# Supplementary material for: Interpreting Functional Impact of Genetic Variations by Network QTL for Genotype–Phenotype Association Study
Source: Frontiers journal article supplement (doi:10.3389/fcell.2021.720321), 2022-01-26

**(A) EHMT1 --- CDYL**

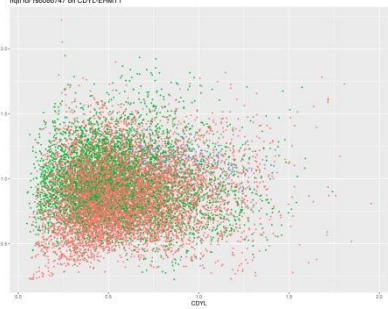

**(B) OAS1 --- GBP1**

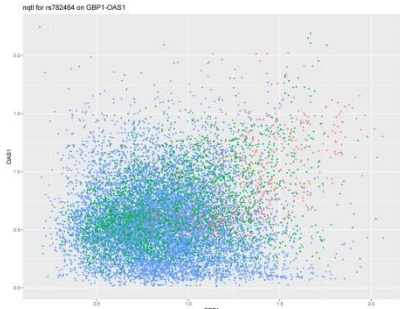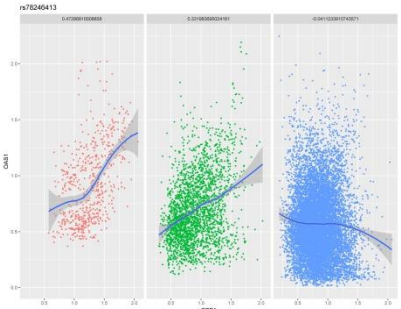

**(C) ELOC --- HERC6**

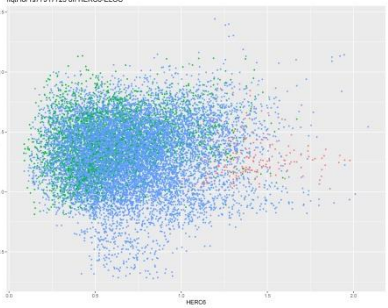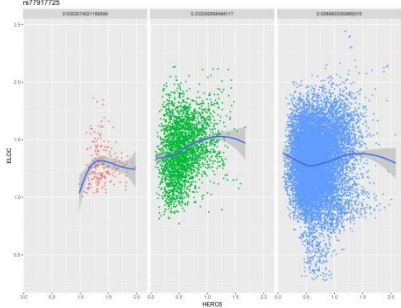

**(D) VPS72 --- HISTH2AC**

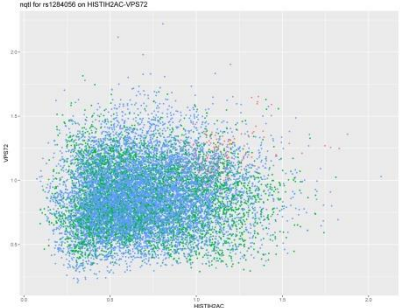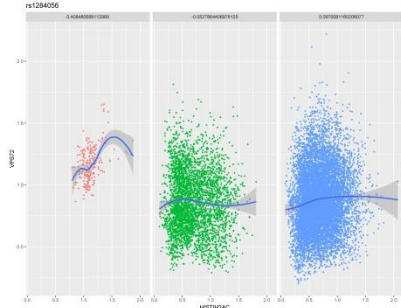

**(E) HLA-C --- IFIT3**

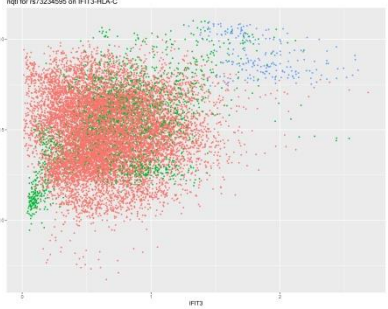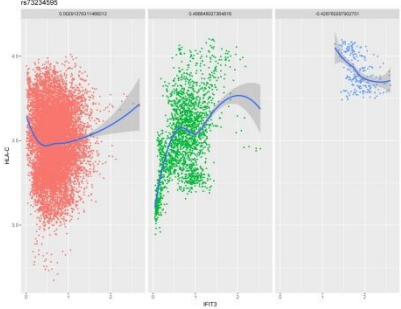

**(F) HLA-E --- IFIT3**

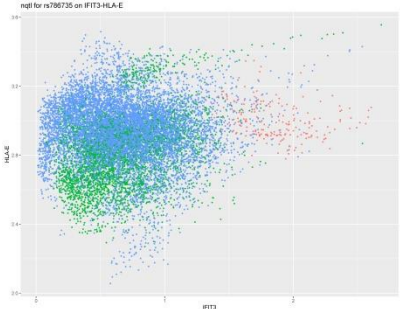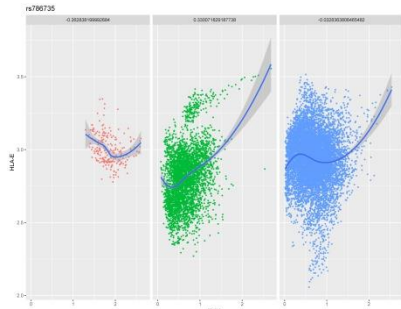

**(G) IFIT2 --- IFIT3**

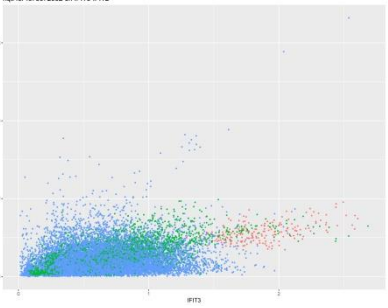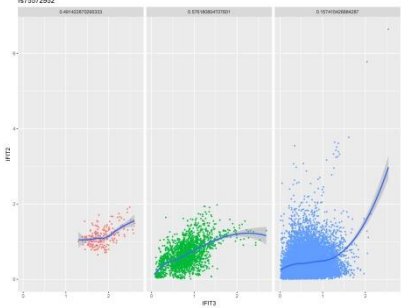

**(H) IFIT3 --- IFIT4**

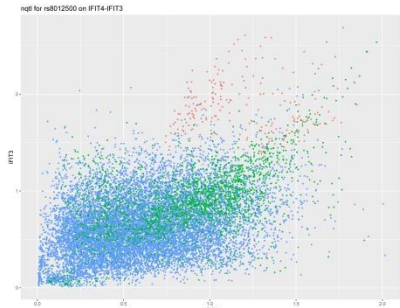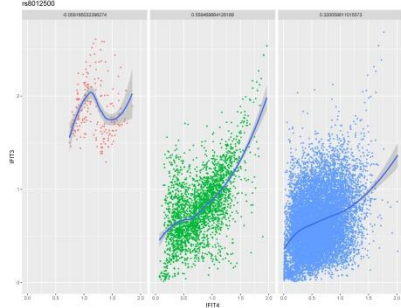

**(I) MX1 --- MX2**

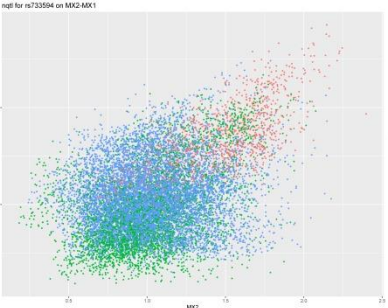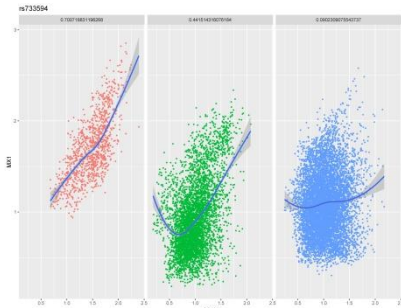

**(J) RPL27A --- RPL29**

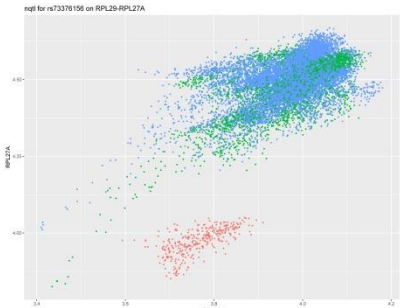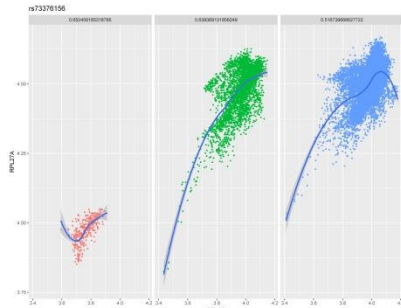

**(K) HECTD1 --- SMURF1**

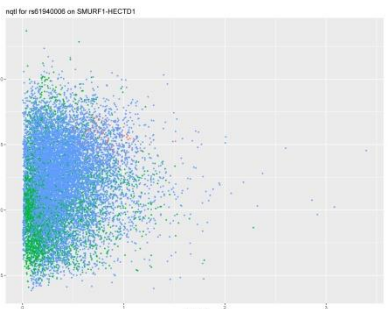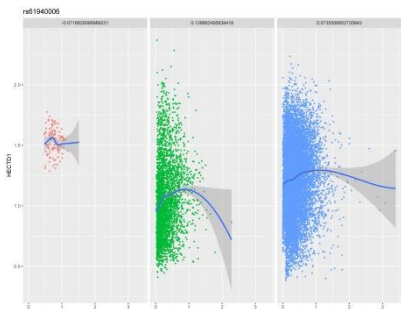

Supplement: Data_Sheet_1.ZIP [file Data_Sheet_1.ZIP]
