# Supplementary material for: Interpreting Functional Impact of Genetic Variations by Network QTL for Genotype–Phenotype Association Study
Source: Frontiers journal article supplement (doi:10.3389/fcell.2021.720321), 2022-01-26

ROC Curve of module 1

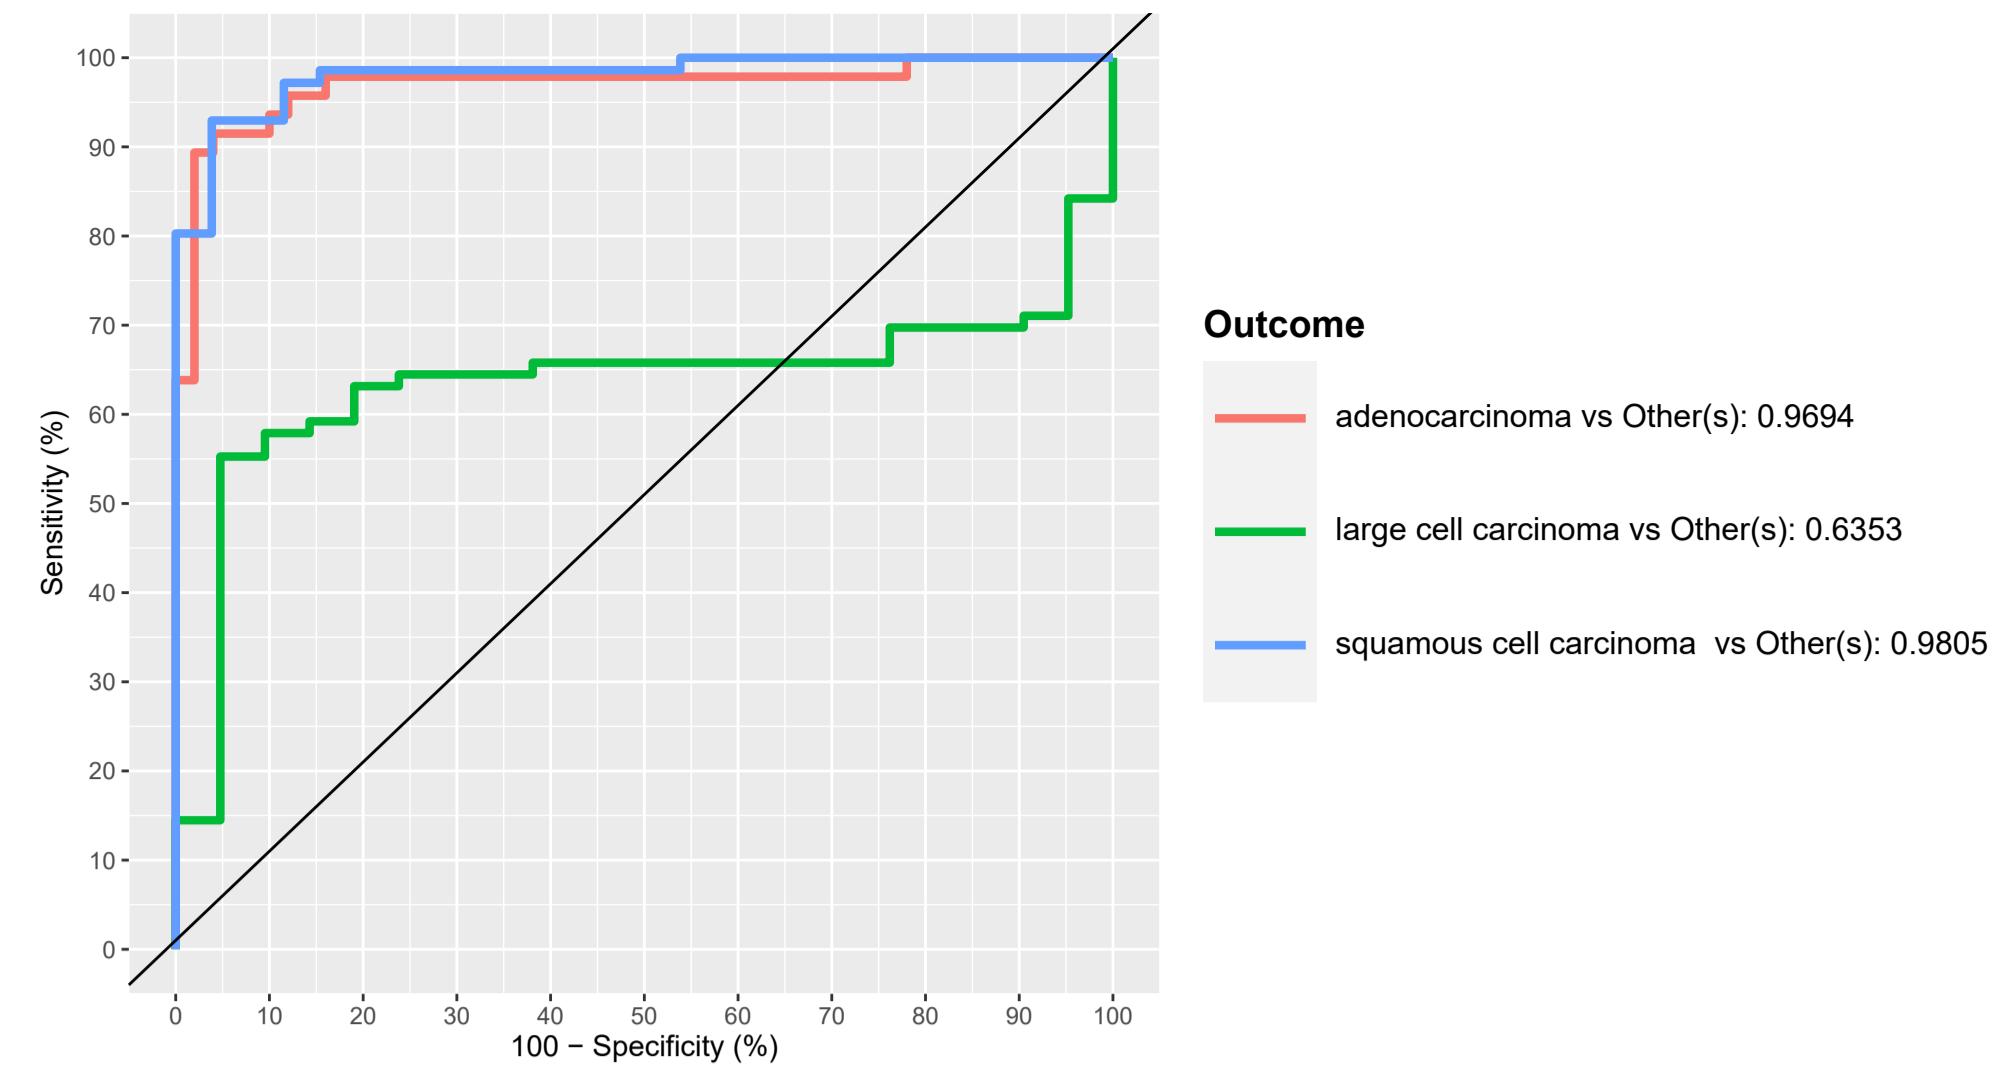

ROC Curve Comp of module 2

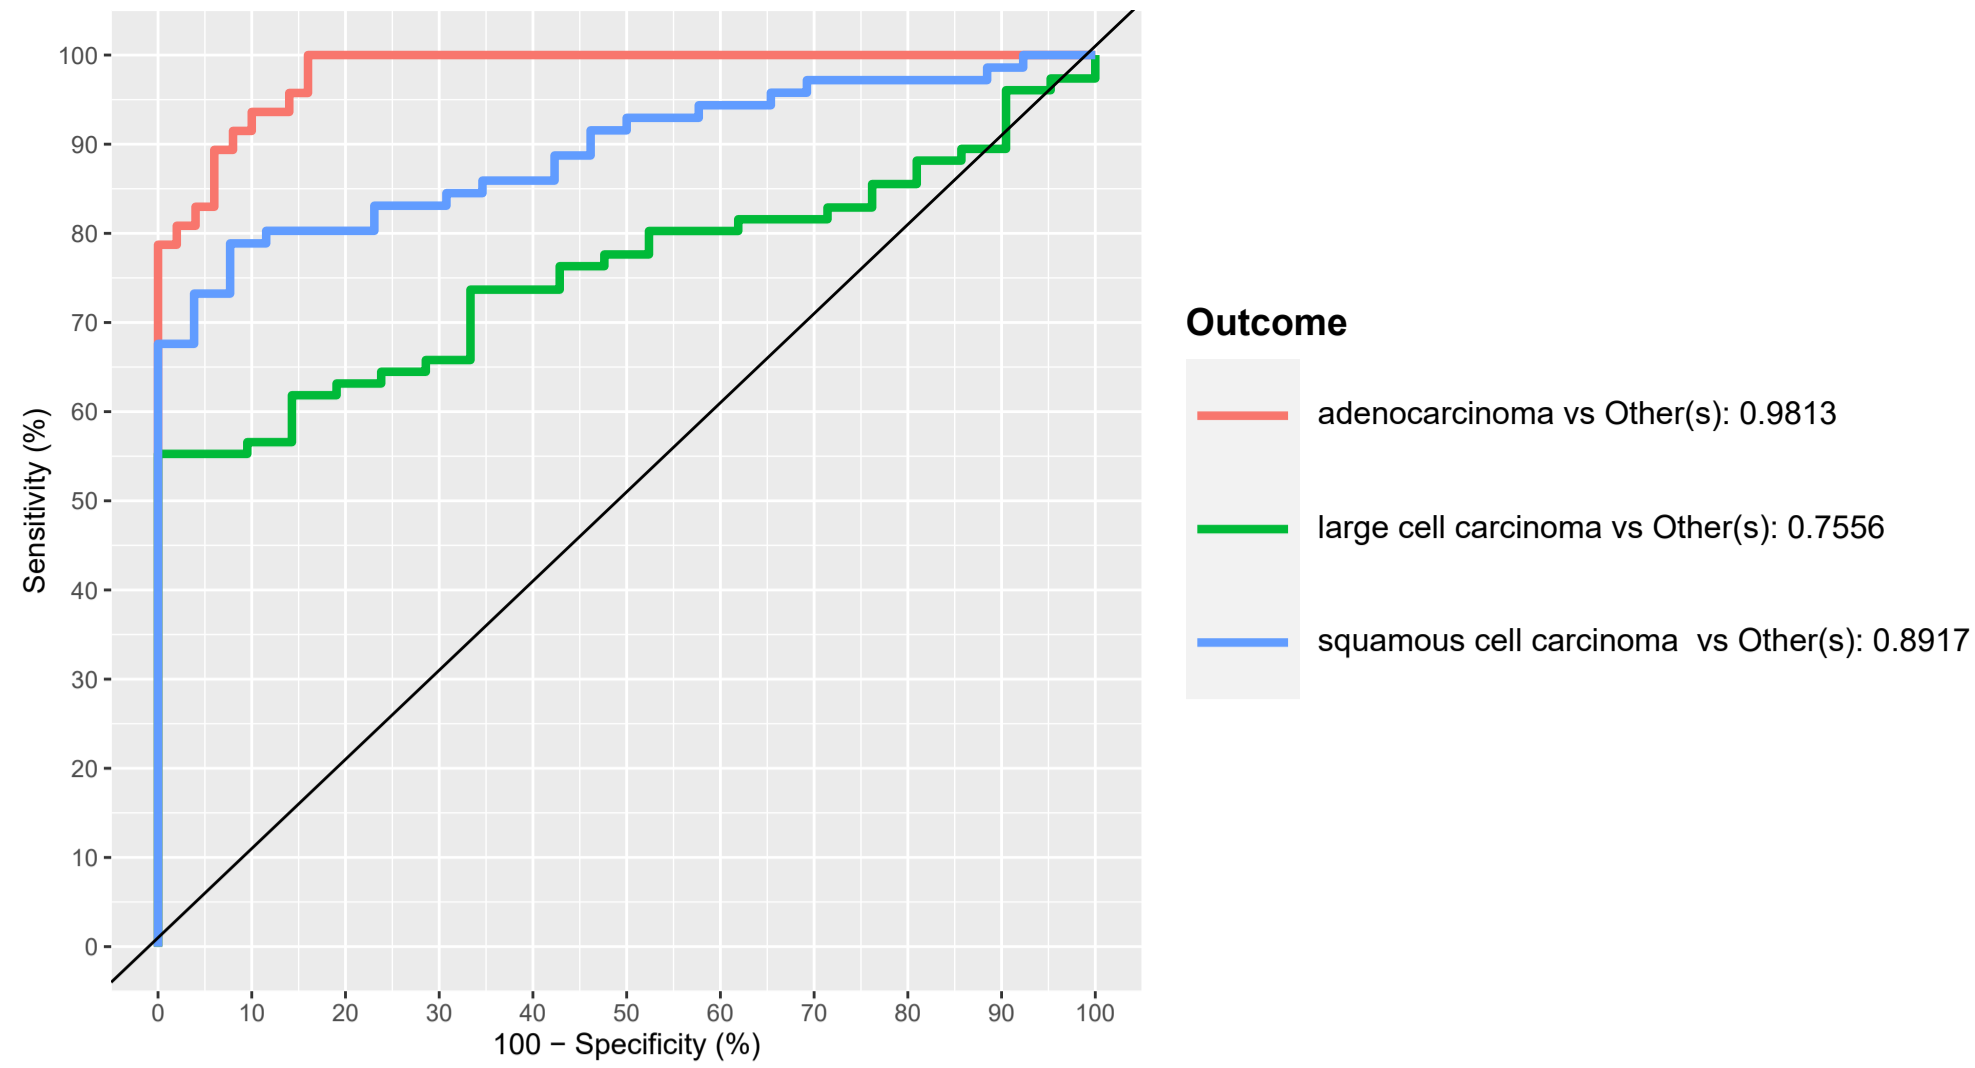

ROC Curve of module 3

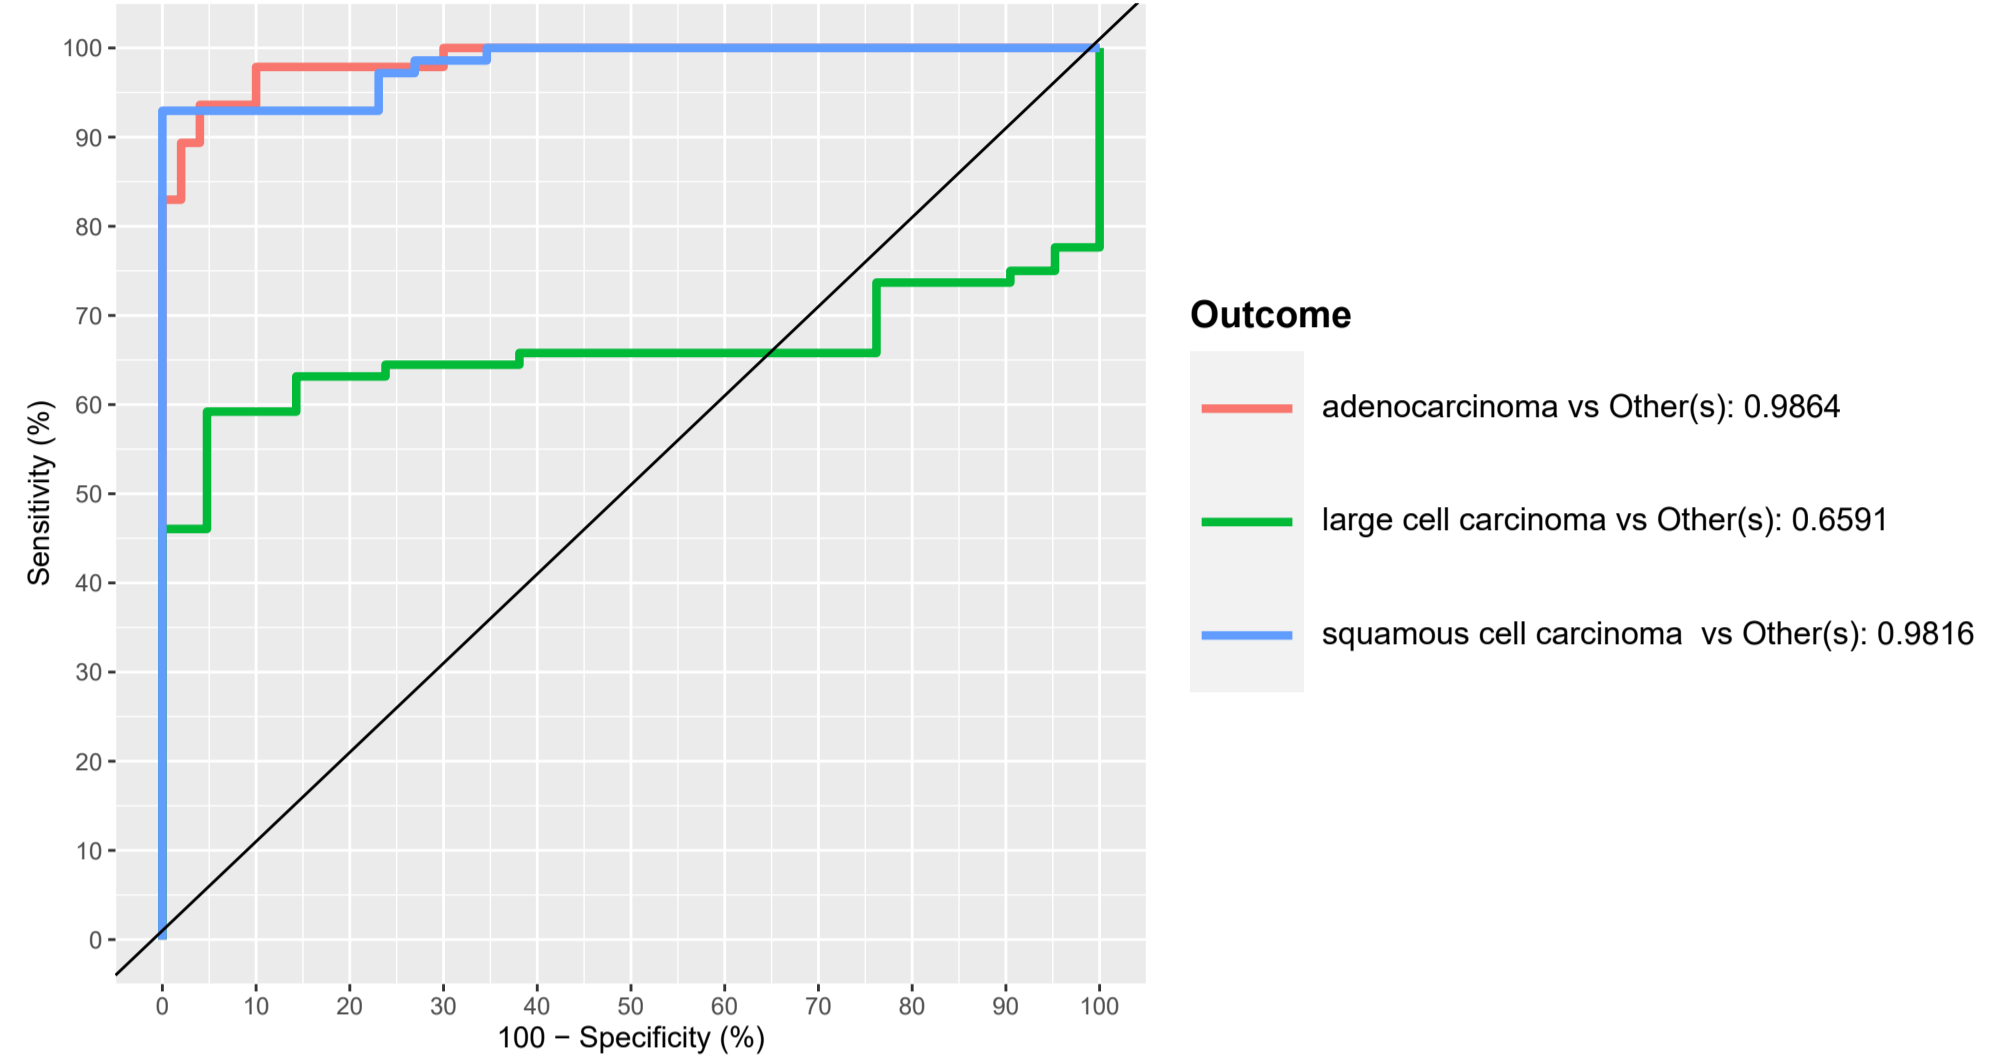

ROC Curve of module 4

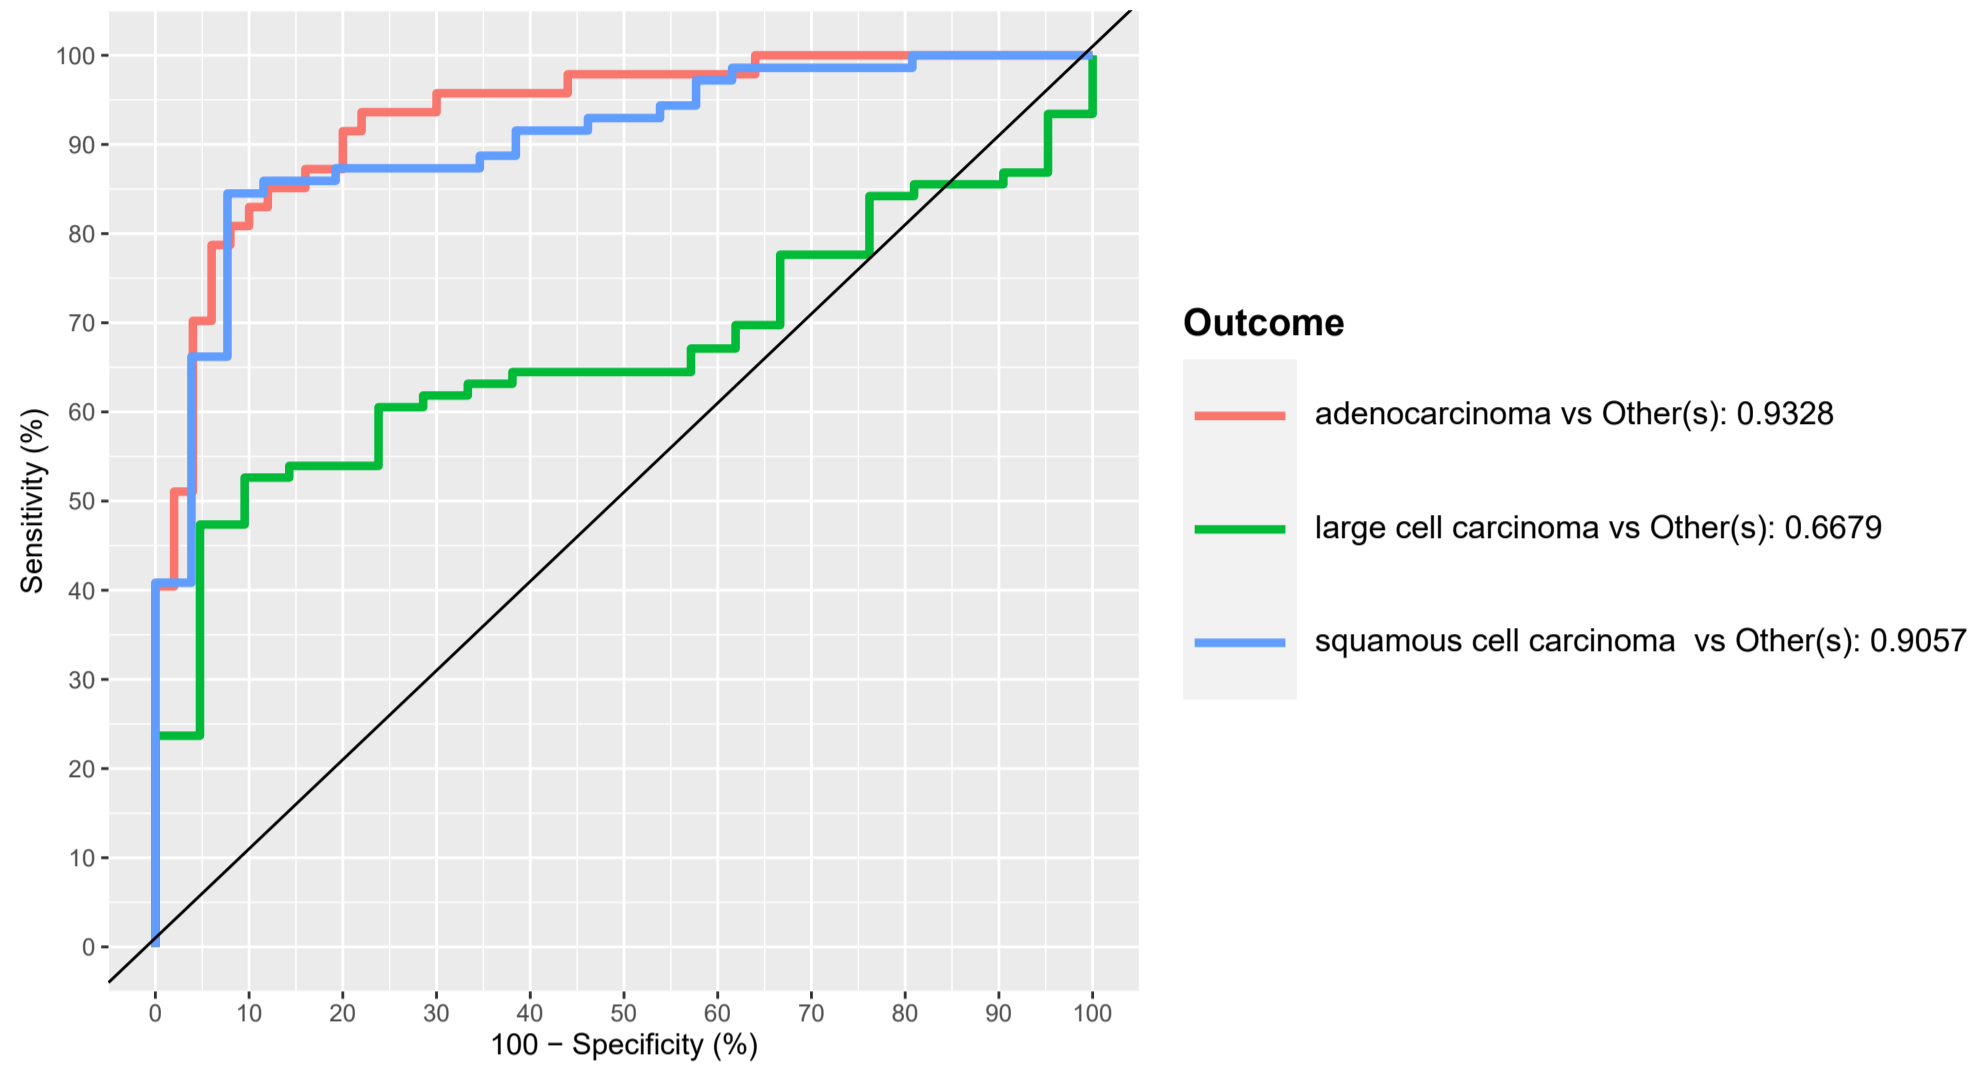

ROC Curve of module 5

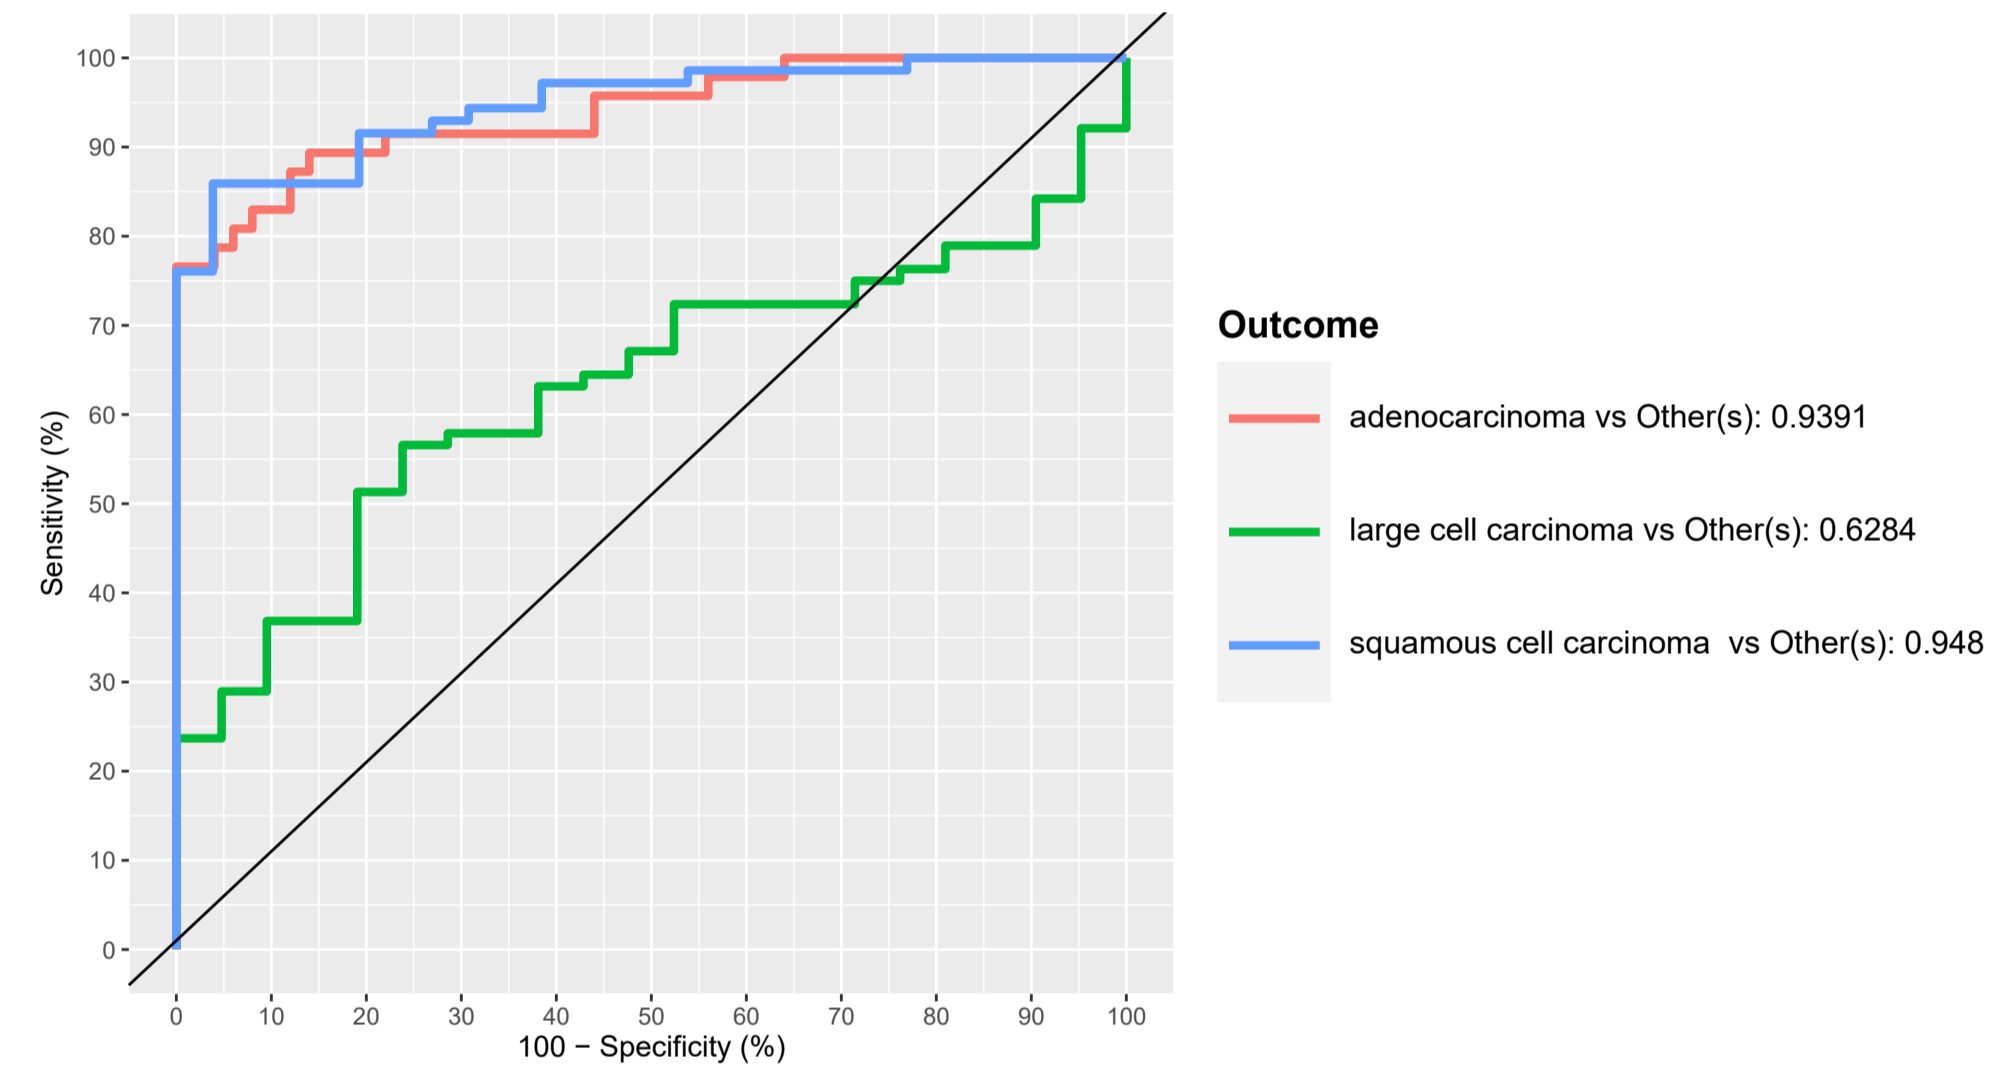

ROC Curve of module 6

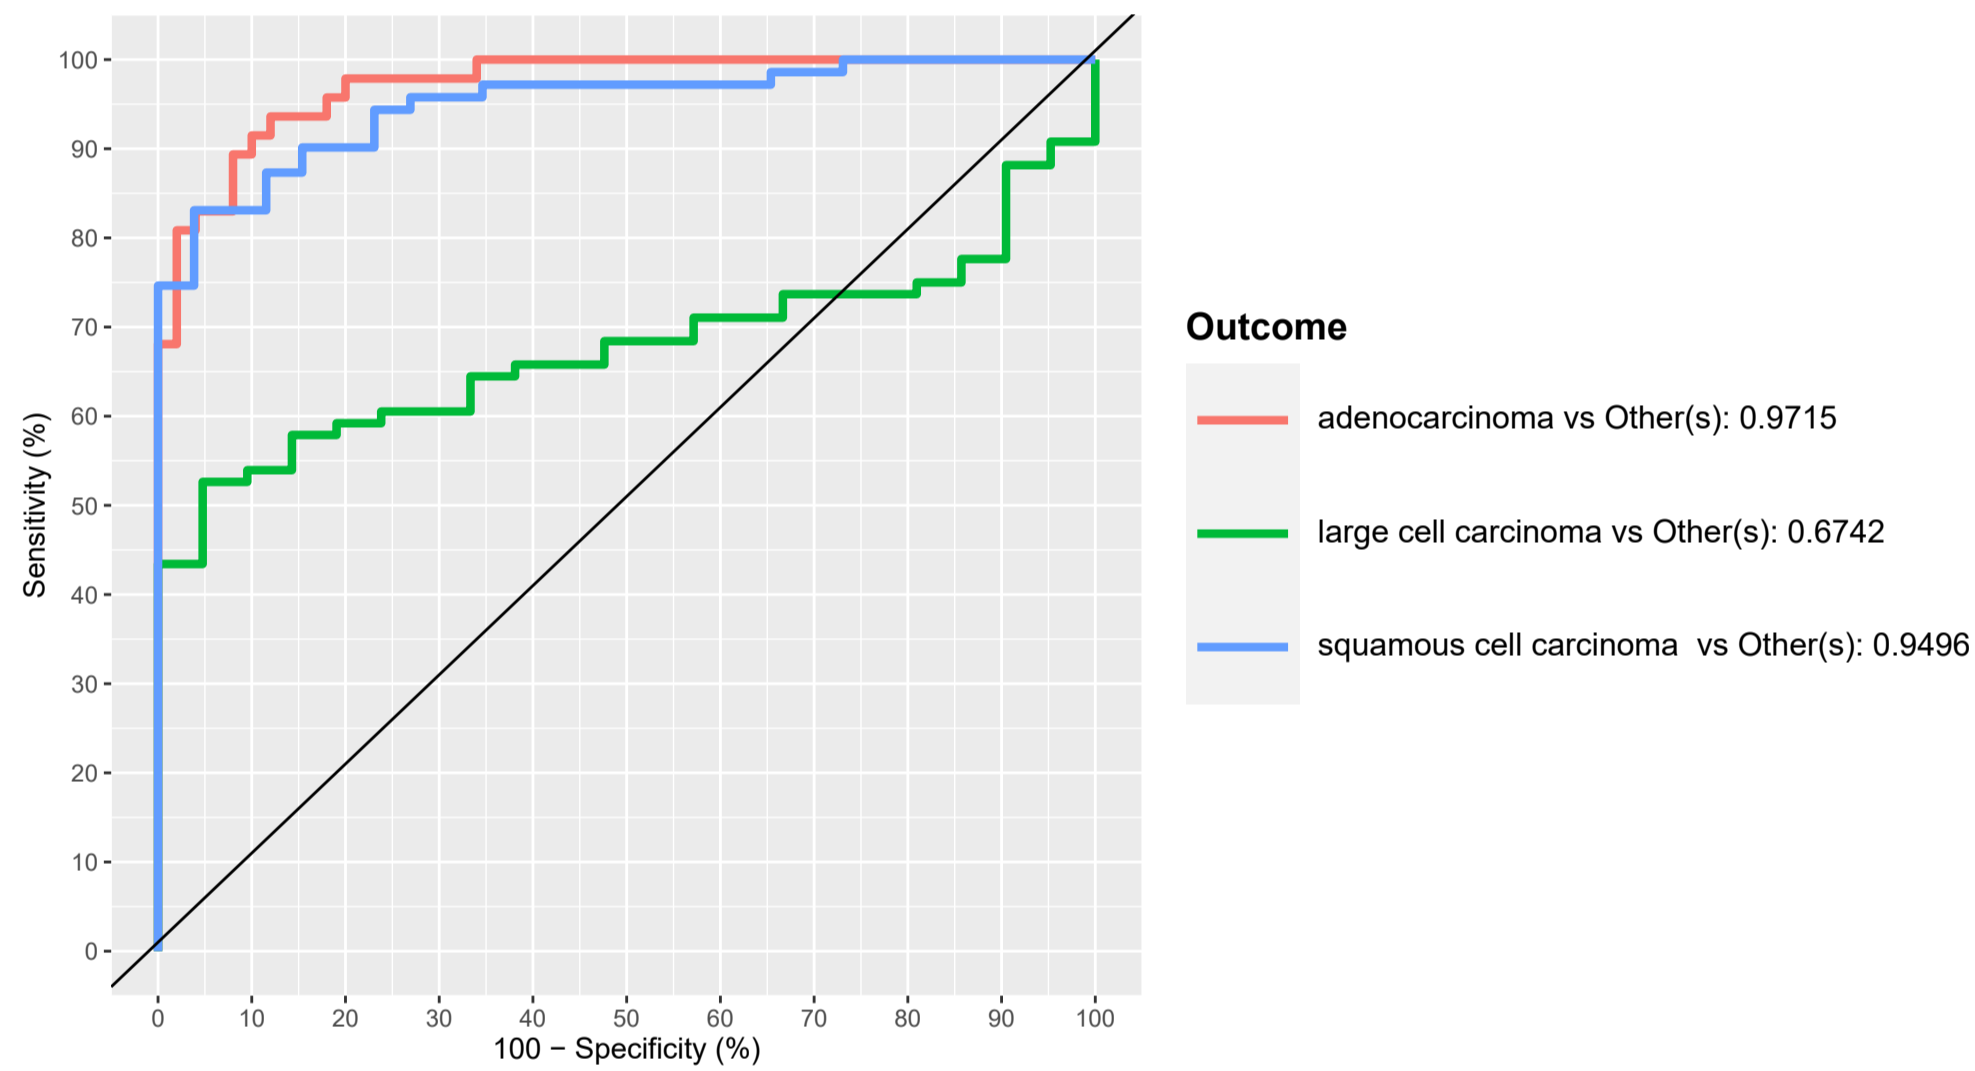

ROC Curve of module 7

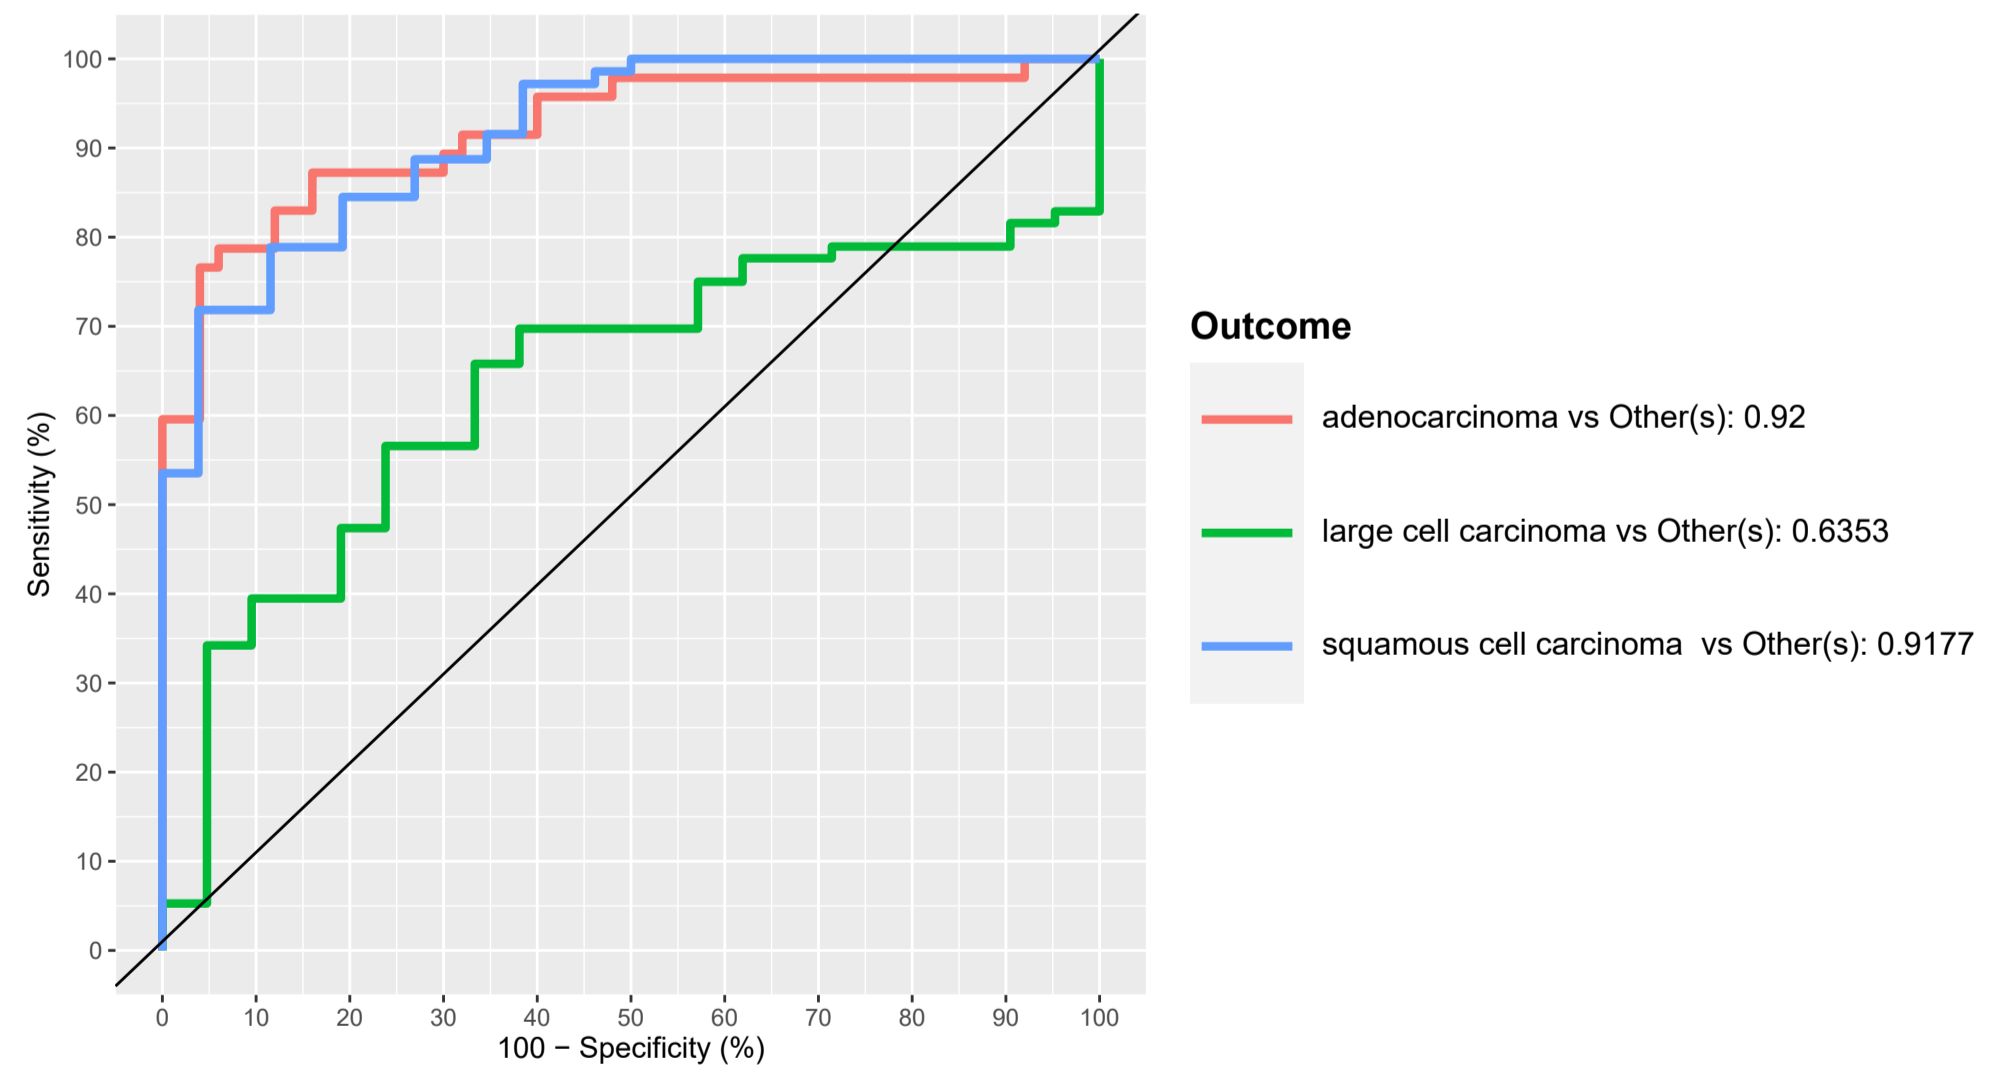

ROC Curve of module 8

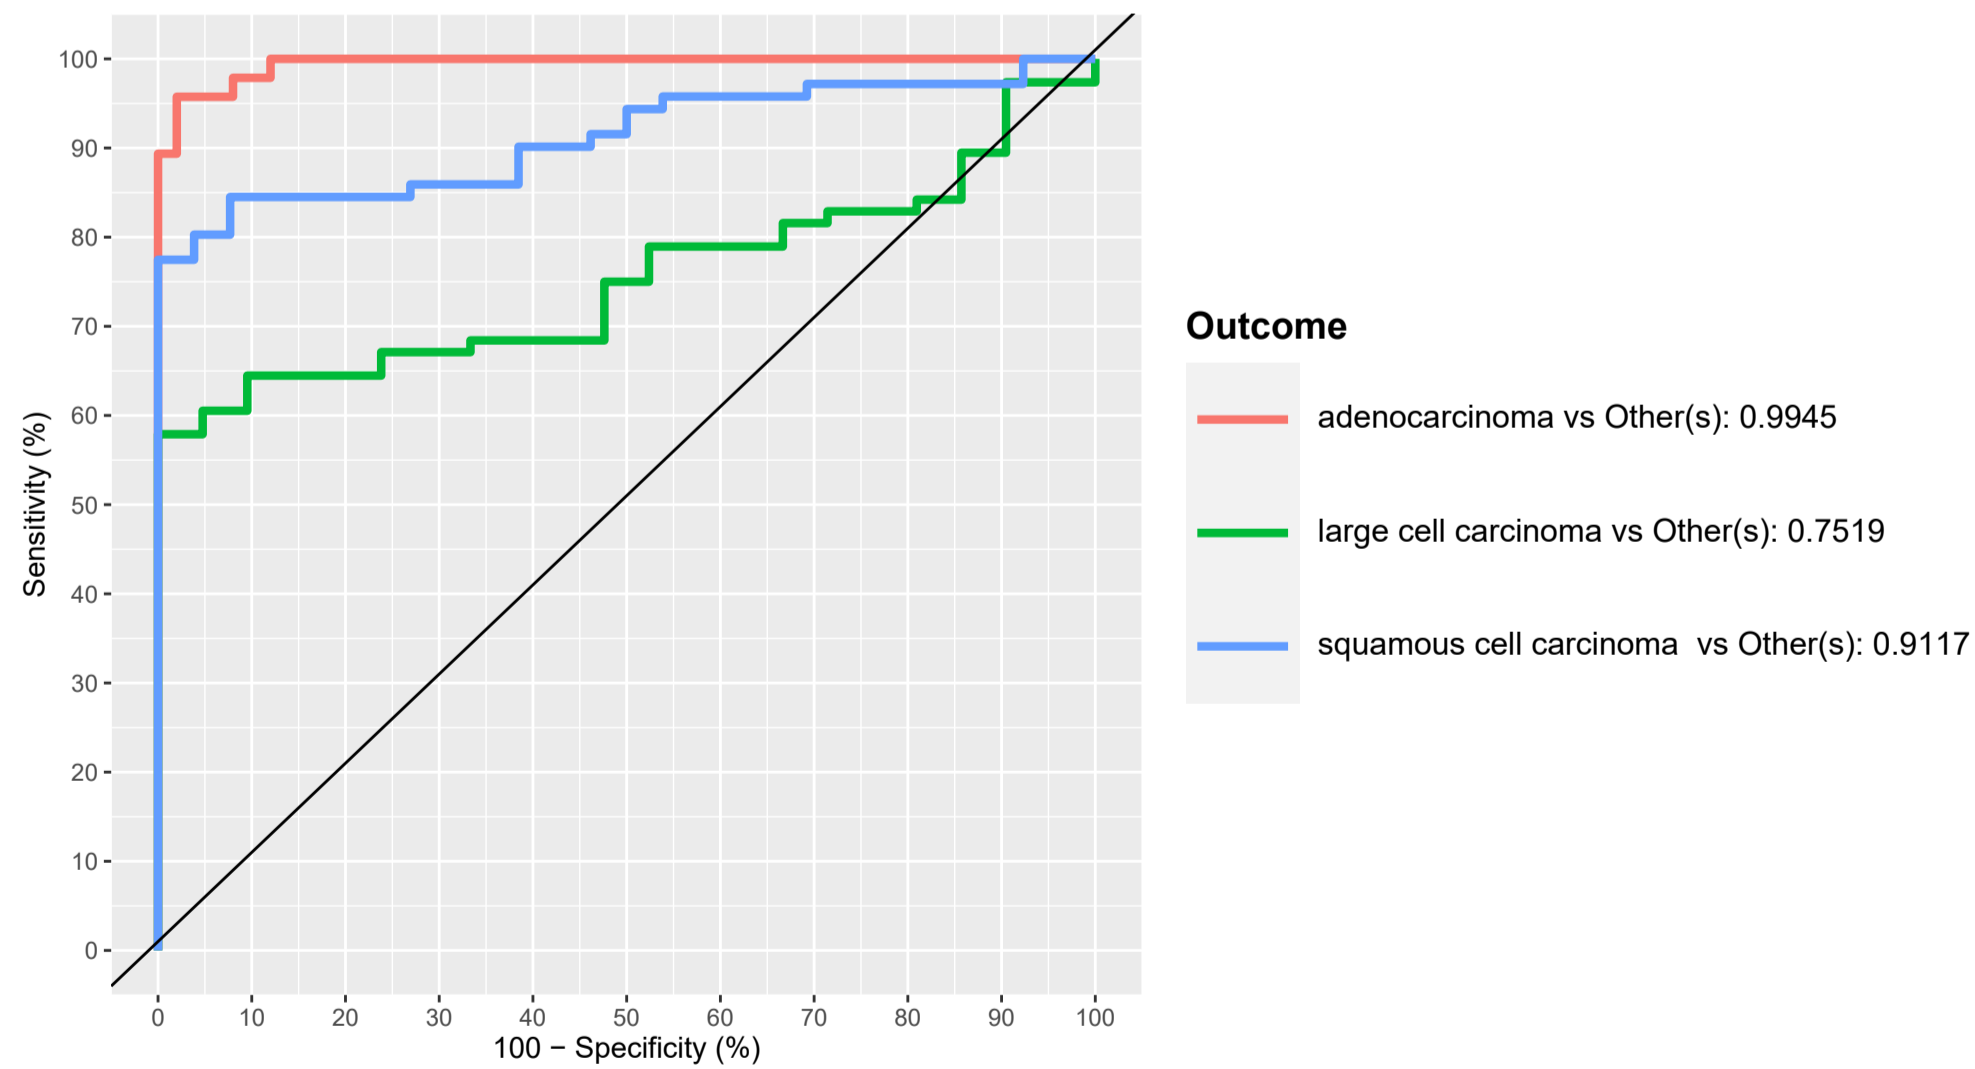

ROC Curve of module 9

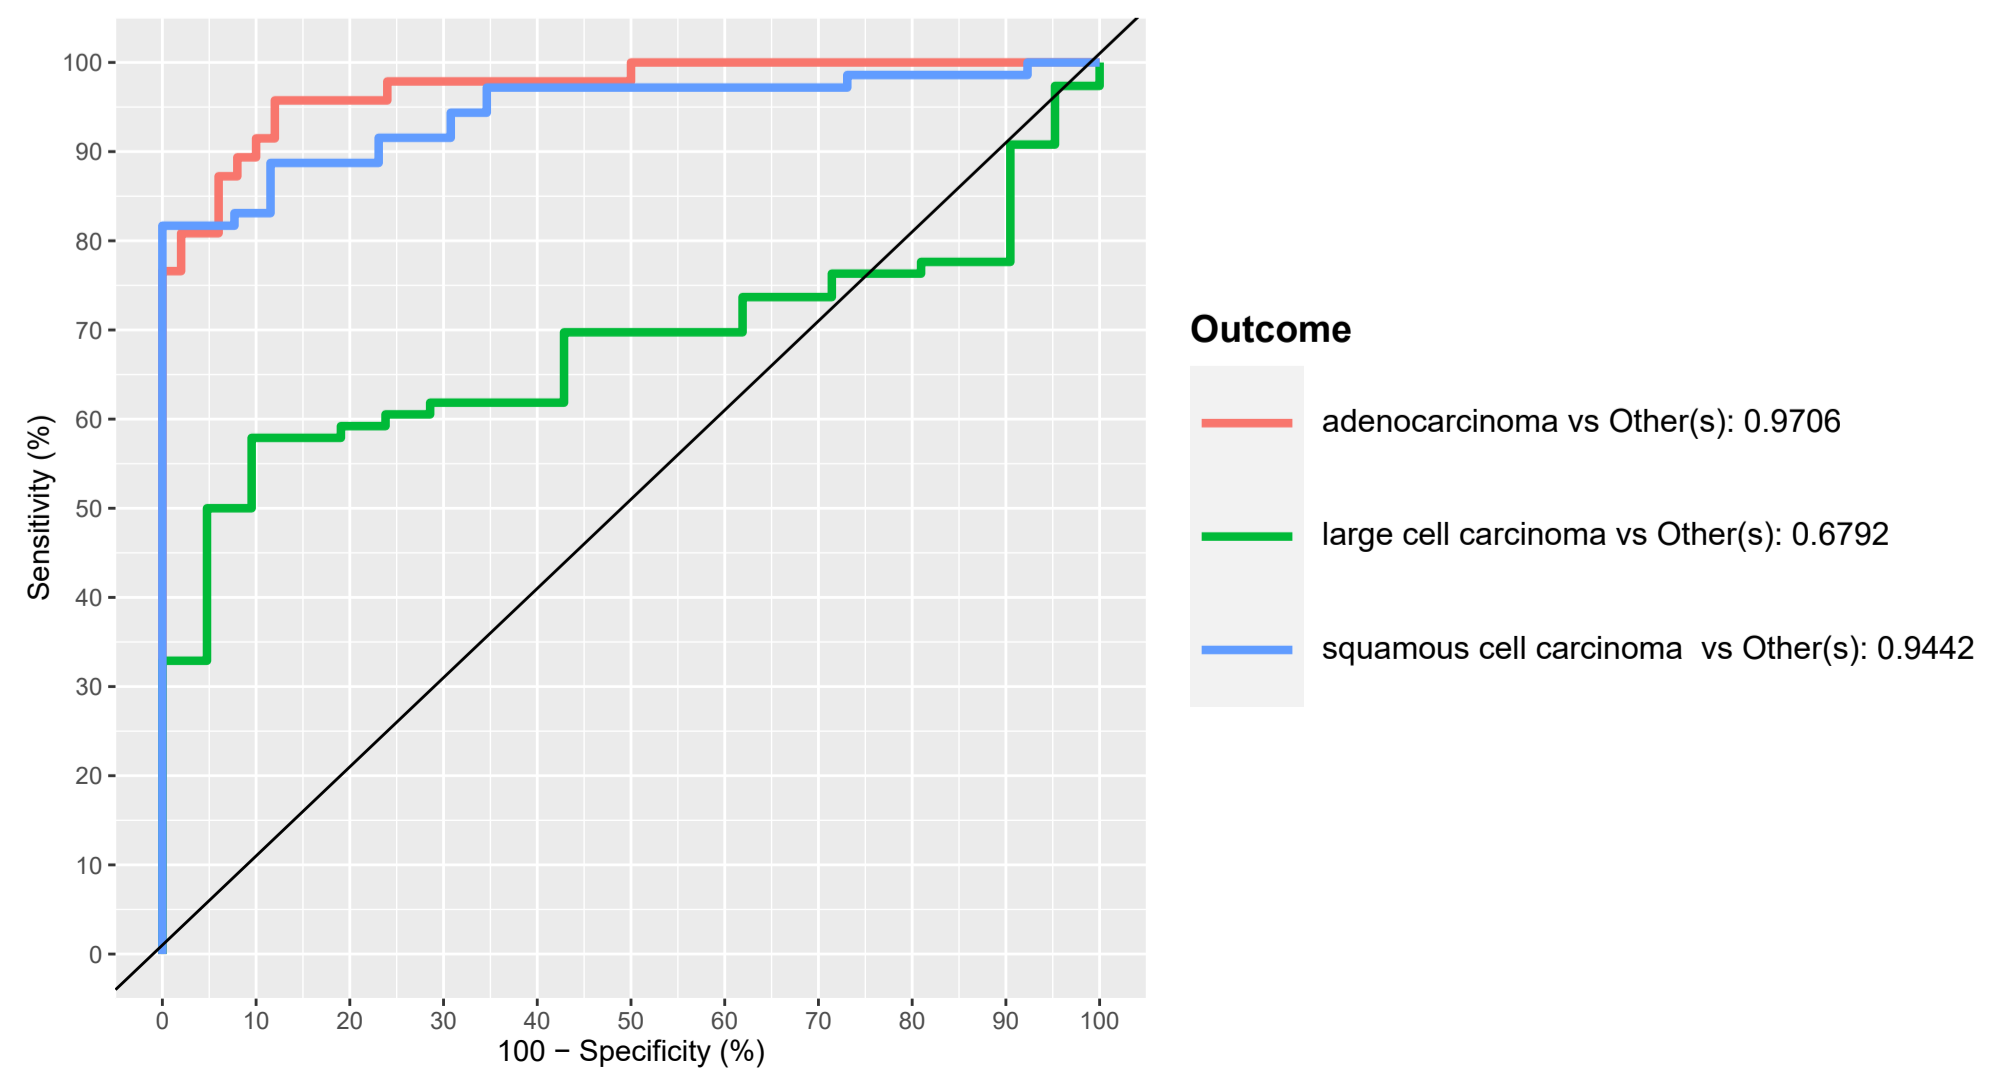

ROC Curve of module 10

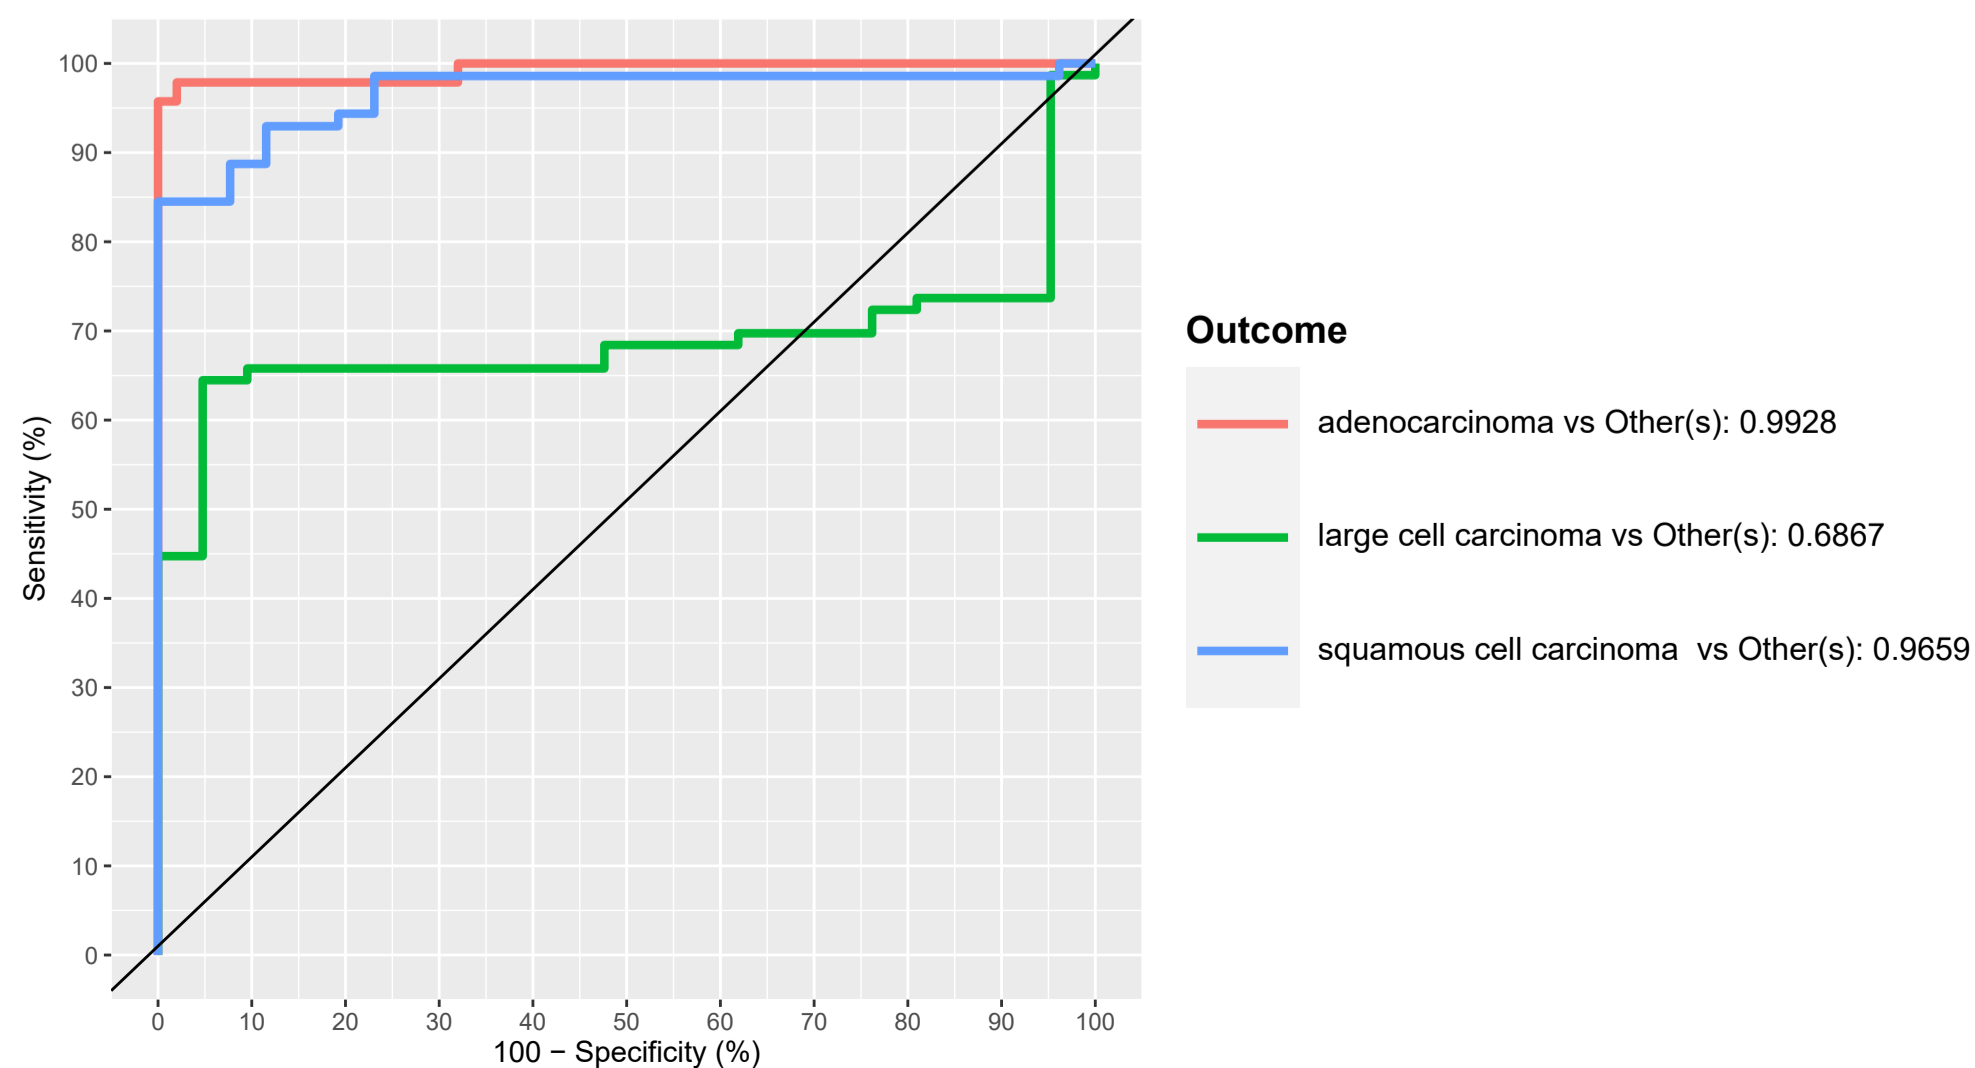

Supplement: Data_Sheet_1.ZIP [file Data_Sheet_1.ZIP]
