# Supplementary material for: Interpreting Functional Impact of Genetic Variations by Network QTL for Genotype–Phenotype Association Study
Source: Frontiers journal article supplement (doi:10.3389/fcell.2021.720321), 2022-01-26
Supplement: Data_Sheet_1.ZIP [file Data_Sheet_1.ZIP]

Kidney - KIPAN - TCGA Kidney PAN cancer TCGA June 2016 (runwebz v1.13 Sep/11/2015) 2019-04-09 02:32

Kidney - KIPAN - TCGA Kidney PAN cancer TCGA June 2016 (runwebz v1.13 Sep/11/2015) 2019-04-09 03:12

Kidney - KIPAN - TCGA Kidney PAN cancer TCGA June 2016 (unpublished) (13 Sep 11 2015) 2016-04-09 02:50

Kidney - KIPAN - TCGA Kidney PAN cancer TCGA June 2016 (runwebz v1.13 Sep'11/15) 2019-04-09 02:21

Kidney - KIPAN - TCGA Kidney PAN cancer TCGA June 2018 (version v1.12 Sep11/2018) 2018-05-09 02:11

Kilowatt-hours: MIDAS, TRQA; Kilowatts: BASIN, TRQA; June 2018

Kidney - KIPAN - TCGA Kidney PAN cancer TCGA June 2016 (unwebb.v1.13 Sep/11/2015) 2016-04-08 02:35

|     |     |     |     |    |    |    |   |   |   |   |   |   |
|-----|-----|-----|-----|----|----|----|---|---|---|---|---|---|
| 396 | 290 | 197 | 130 | 73 | 39 | 23 | 9 | 1 | 0 | 0 | 0 | 0 |
|-----|-----|-----|-----|----|----|----|---|---|---|---|---|---|

|     |     |     |     |    |    |    |    |   |   |   |   |   |
|-----|-----|-----|-----|----|----|----|----|---|---|---|---|---|
| 396 | 287 | 194 | 129 | 79 | 43 | 22 | 11 | 2 | 1 | 0 | 0 | 0 |
|-----|-----|-----|-----|----|----|----|----|---|---|---|---|---|

Kidney - KIPAN - TCGA Kidney PAN cancer TCGA June 2016 (number v1.13 Sep 11/2015) 2015-04-09 02:45
