# Supplementary material for: Interpreting Functional Impact of Genetic Variations by Network QTL for Genotype–Phenotype Association Study
Source: Frontiers journal article supplement (doi:10.3389/fcell.2021.720321), 2022-01-26

QQ-plot for haematopoietic and lymphoid tissue

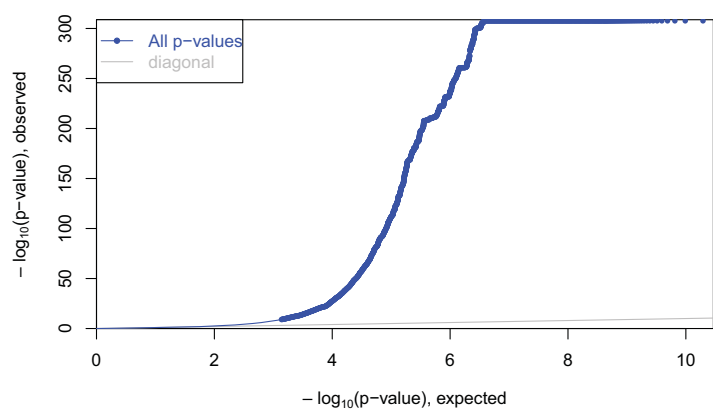

QQ-plot for haematopoietic and lymphoid tissue

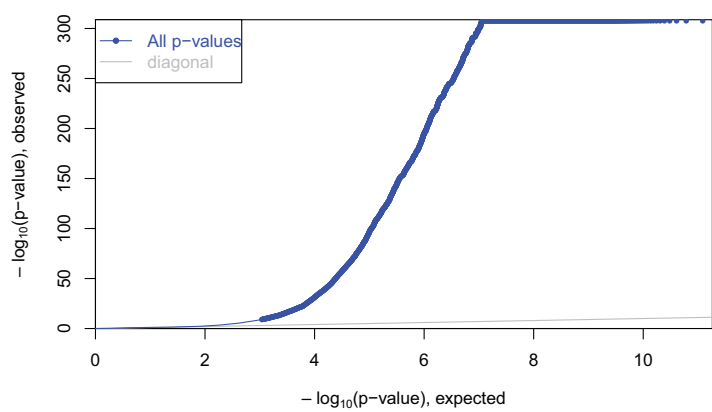

Supplement: Data_Sheet_1.ZIP [file Data_Sheet_1.ZIP]
