# Supplementary material for: Interpreting Functional Impact of Genetic Variations by Network QTL for Genotype–Phenotype Association Study
Source: Frontiers journal article supplement (doi:10.3389/fcell.2021.720321), 2022-01-26
Supplement: Data_Sheet_1.ZIP [file Data_Sheet_1.ZIP]

nQTL/eQTL

Genotype profile in different samples (sequencing)

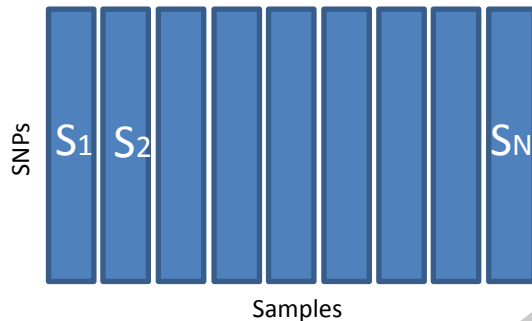

Co-expression QTL

Gene expression profile  
in different samples (Inferring)

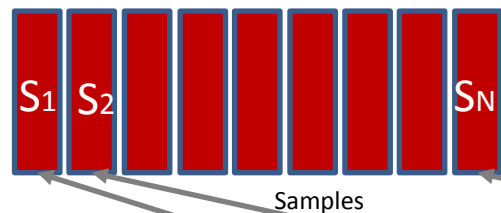

Gene correlation profile  
in different samples (Inferring)

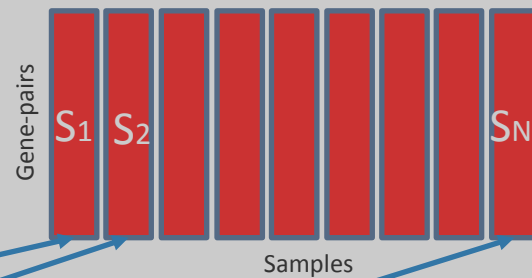

Gene expression average

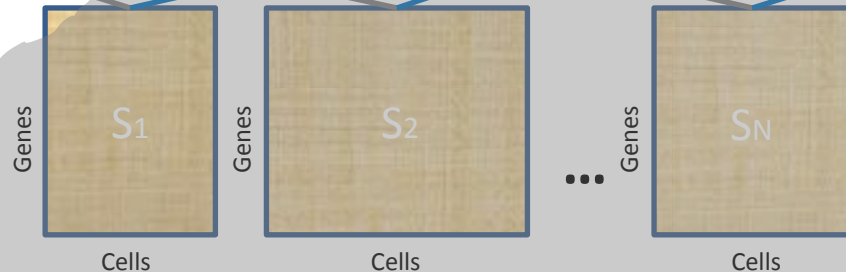

scRNA of one type cell in different samples (sequencing)

Gene-pair co-expression
