# Supplementary material for: Interpreting Functional Impact of Genetic Variations by Network QTL for Genotype–Phenotype Association Study
Source: Frontiers journal article supplement (doi:10.3389/fcell.2021.720321), 2022-01-26
Supplement: Data_Sheet_1.ZIP [file Data_Sheet_1.ZIP]

**(A)**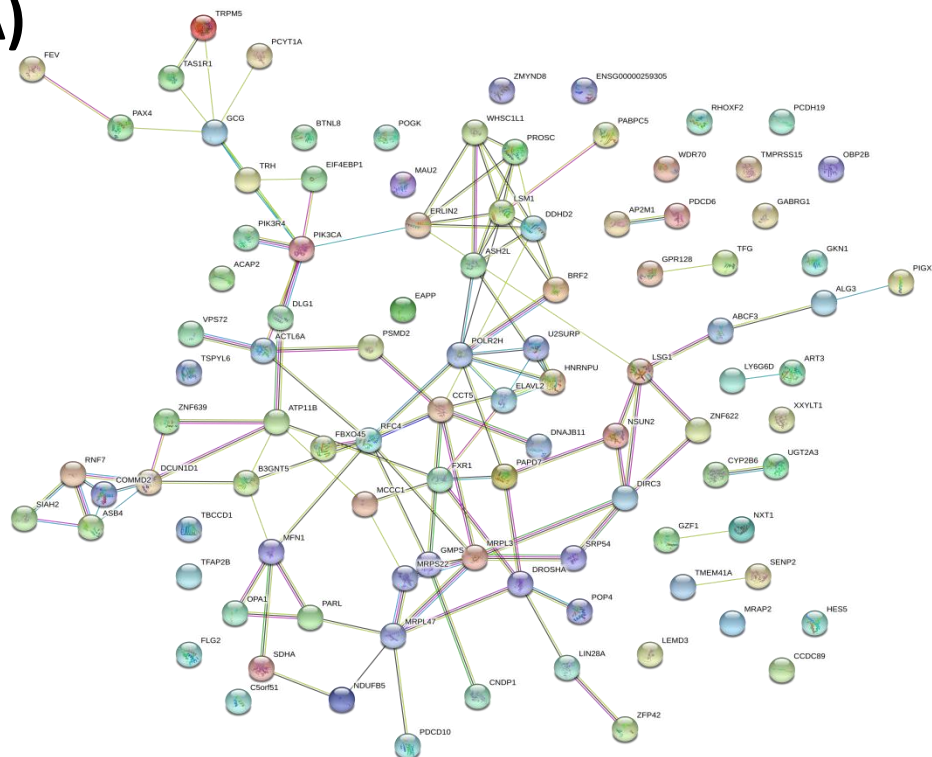

### eQTL: gene-network of top-100 genes

Number of nodes:100

Number of edges:118

Average node degree:2.36

Avg. local clustering coefficient:0.461

Expected number of edges:62

PPI enrichment p-value:1.45e-10

**(B)**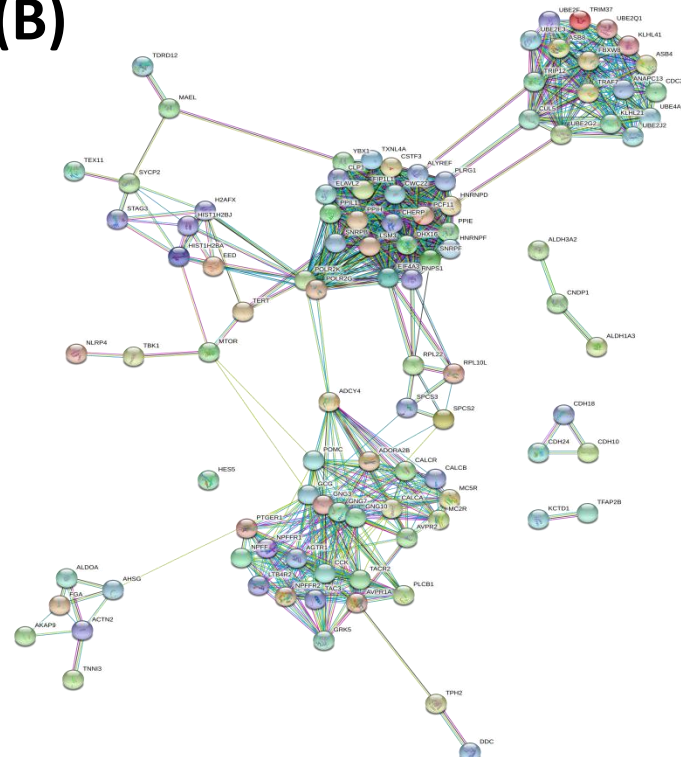

### nQTL: gene-network top-100 genes

Number of nodes:100

Number of edges:687

Average node degree:13.7

Avg. local clustering coefficient:0.829

Expected number of edges:218

PPI enrichment p-value:< 1.0e-16
