# Supplementary material for: Interpreting Functional Impact of Genetic Variations by Network QTL for Genotype–Phenotype Association Study
Source: Frontiers journal article supplement (doi:10.3389/fcell.2021.720321), 2022-01-26

ROC Curve module 1

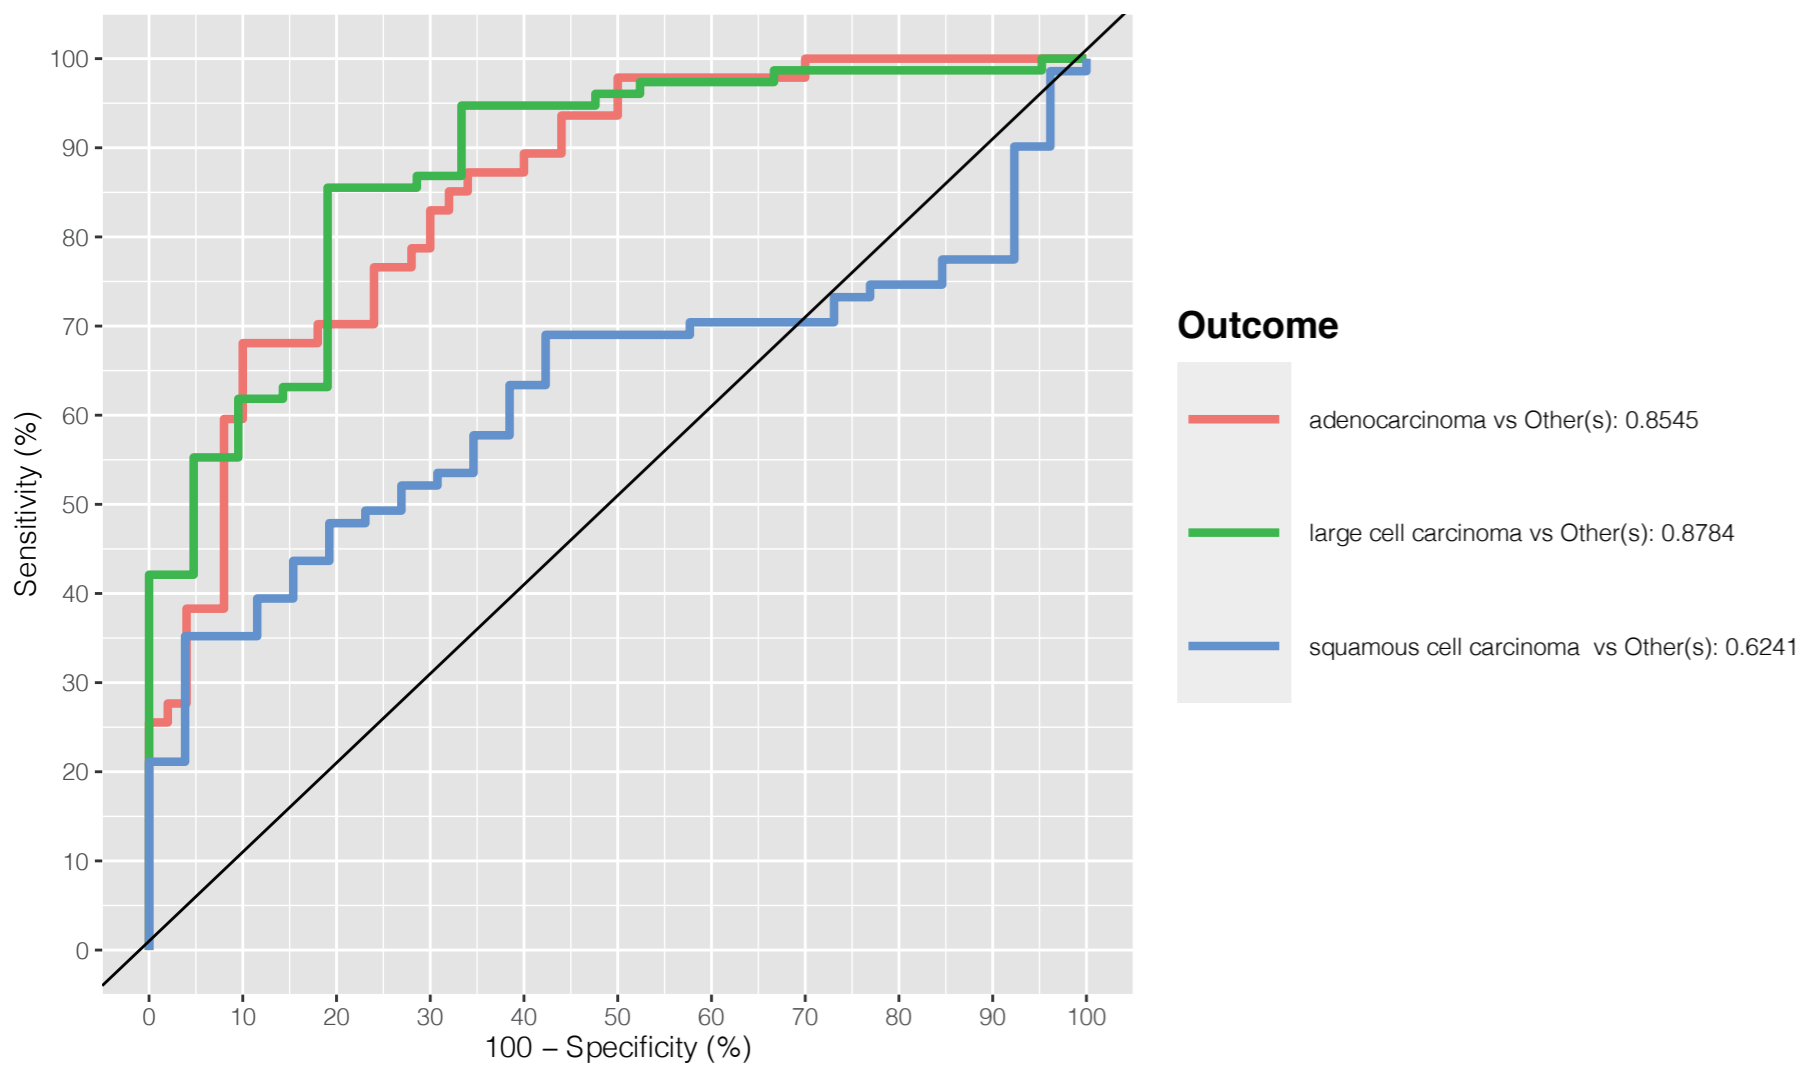

ROC Curve module 2

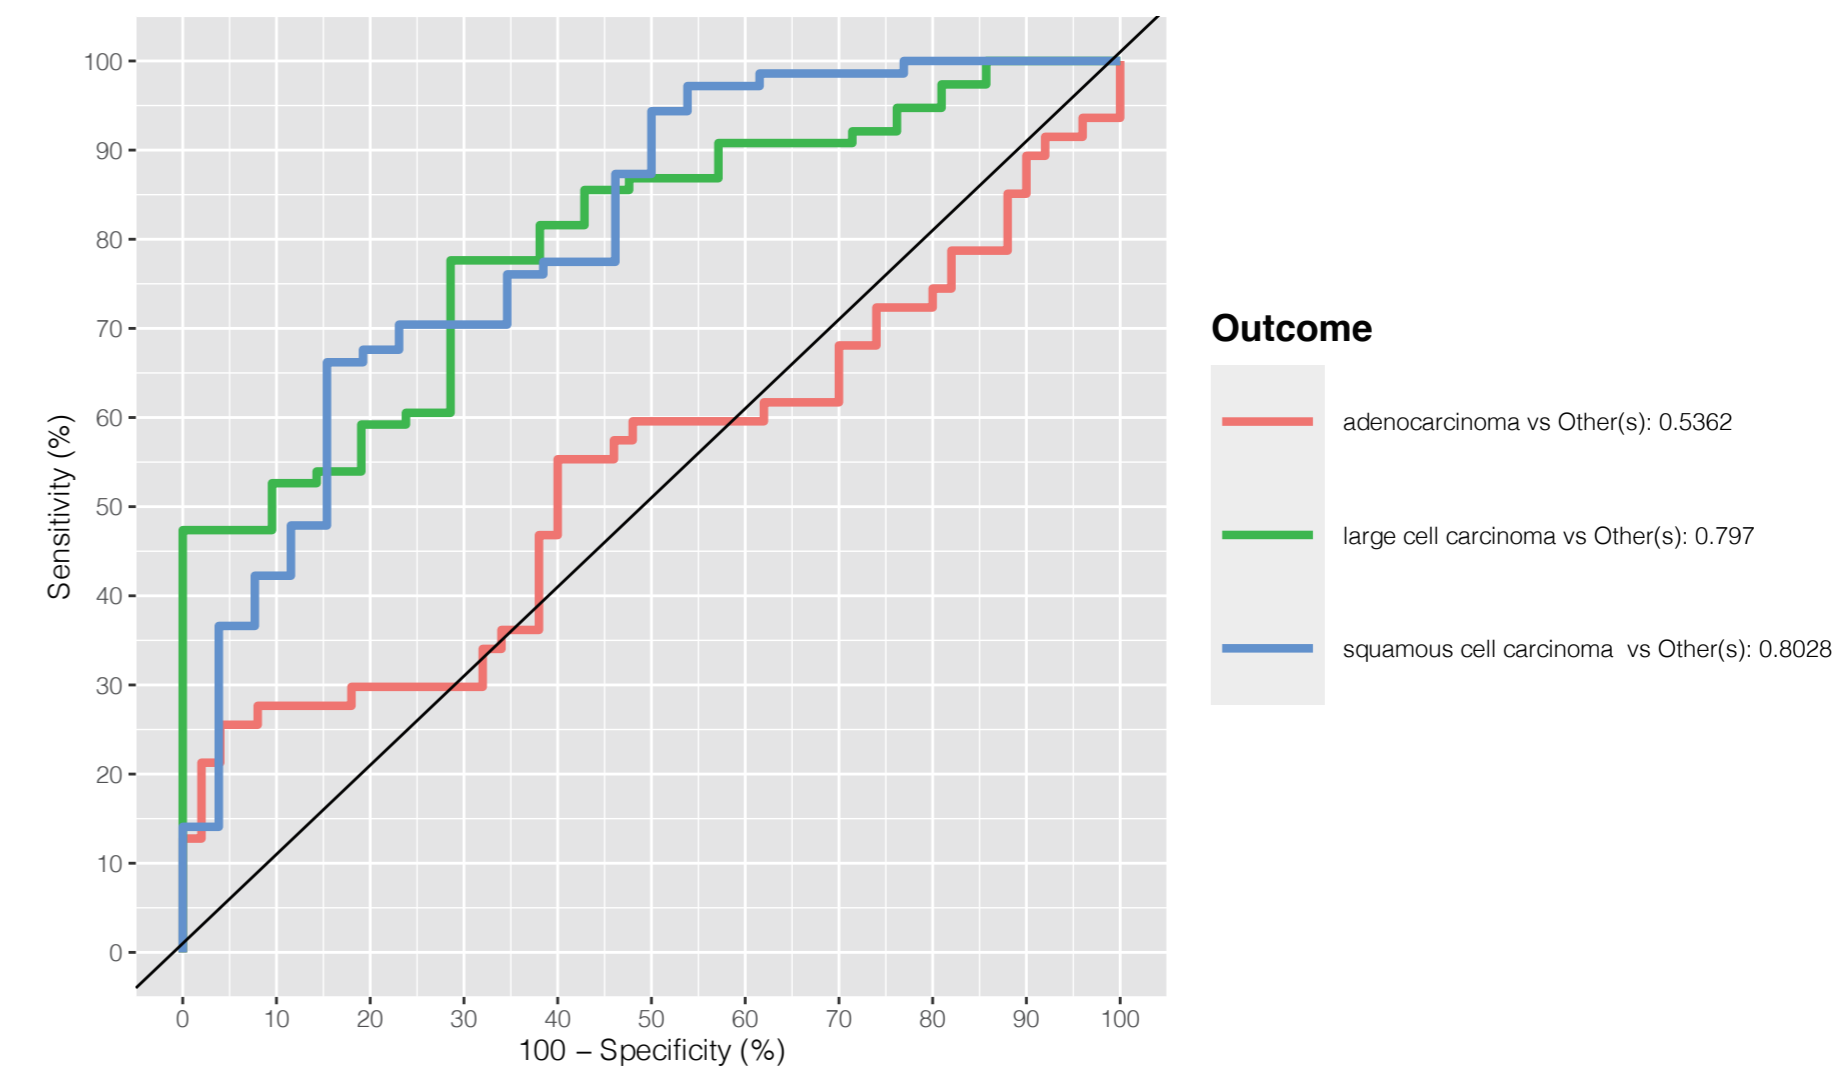

ROC Curve module 3

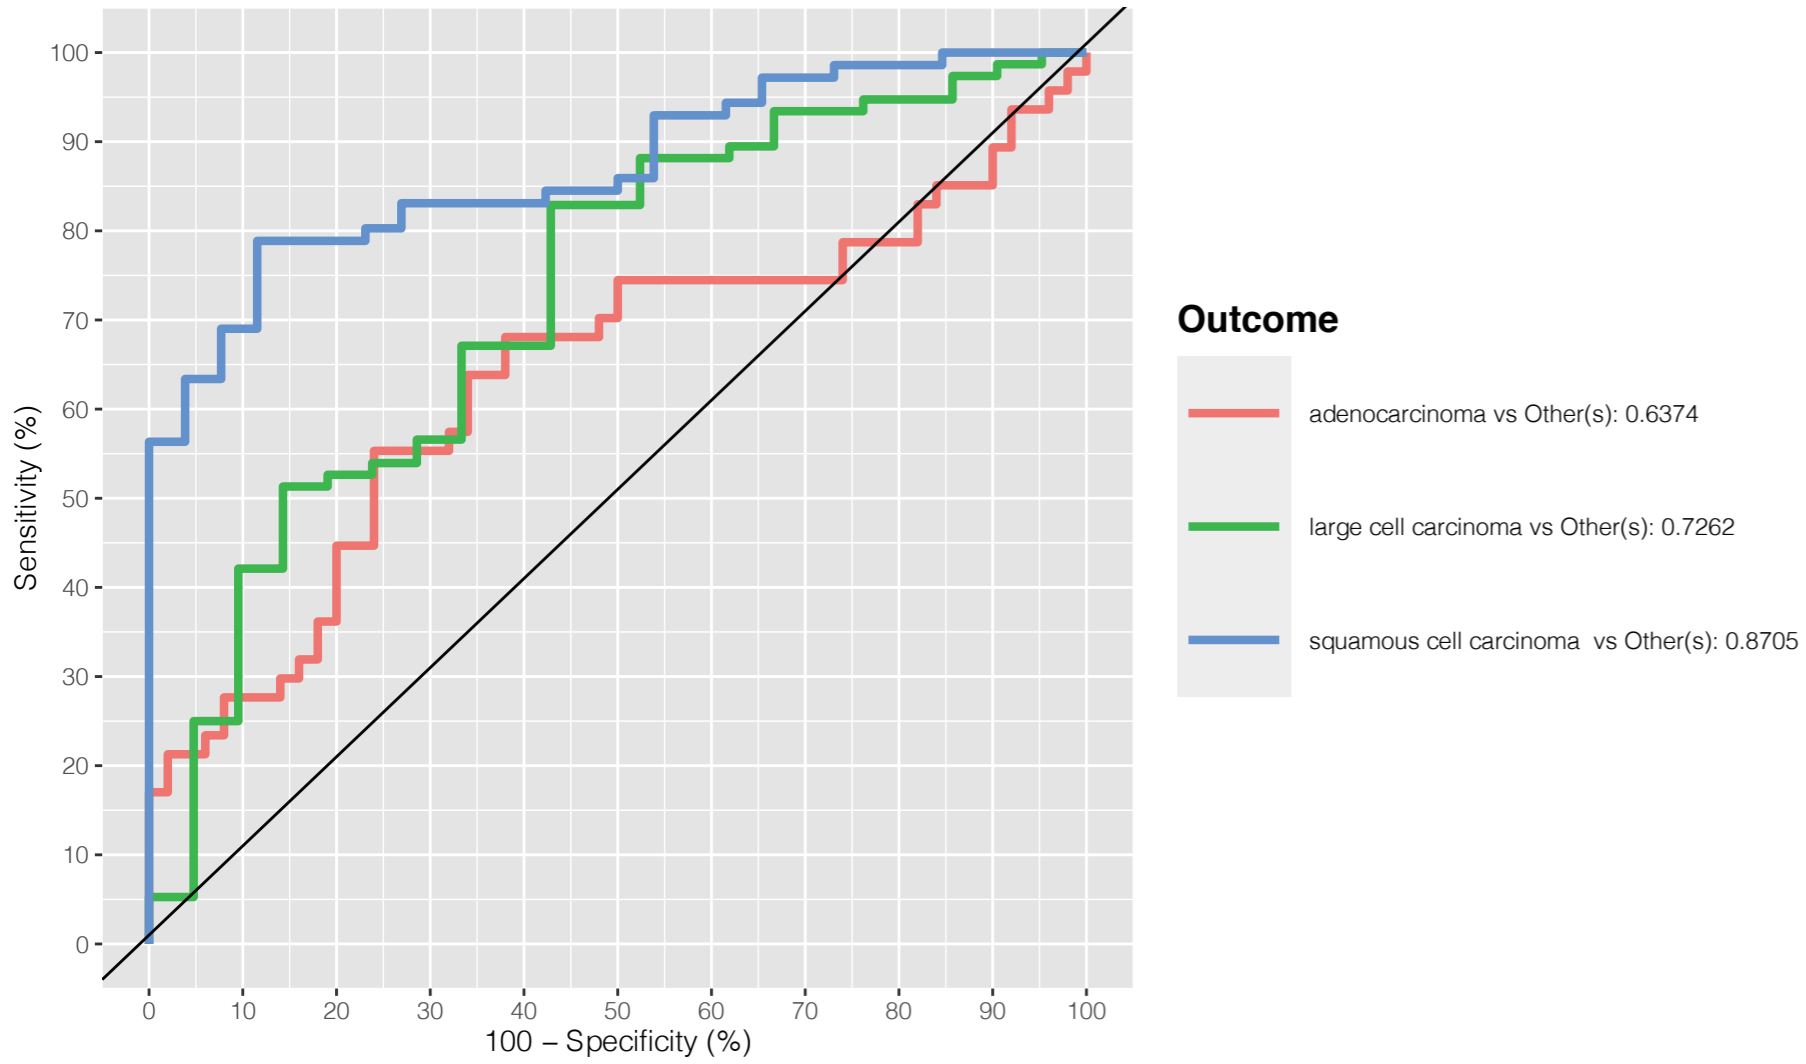

ROC Curve mofule 4

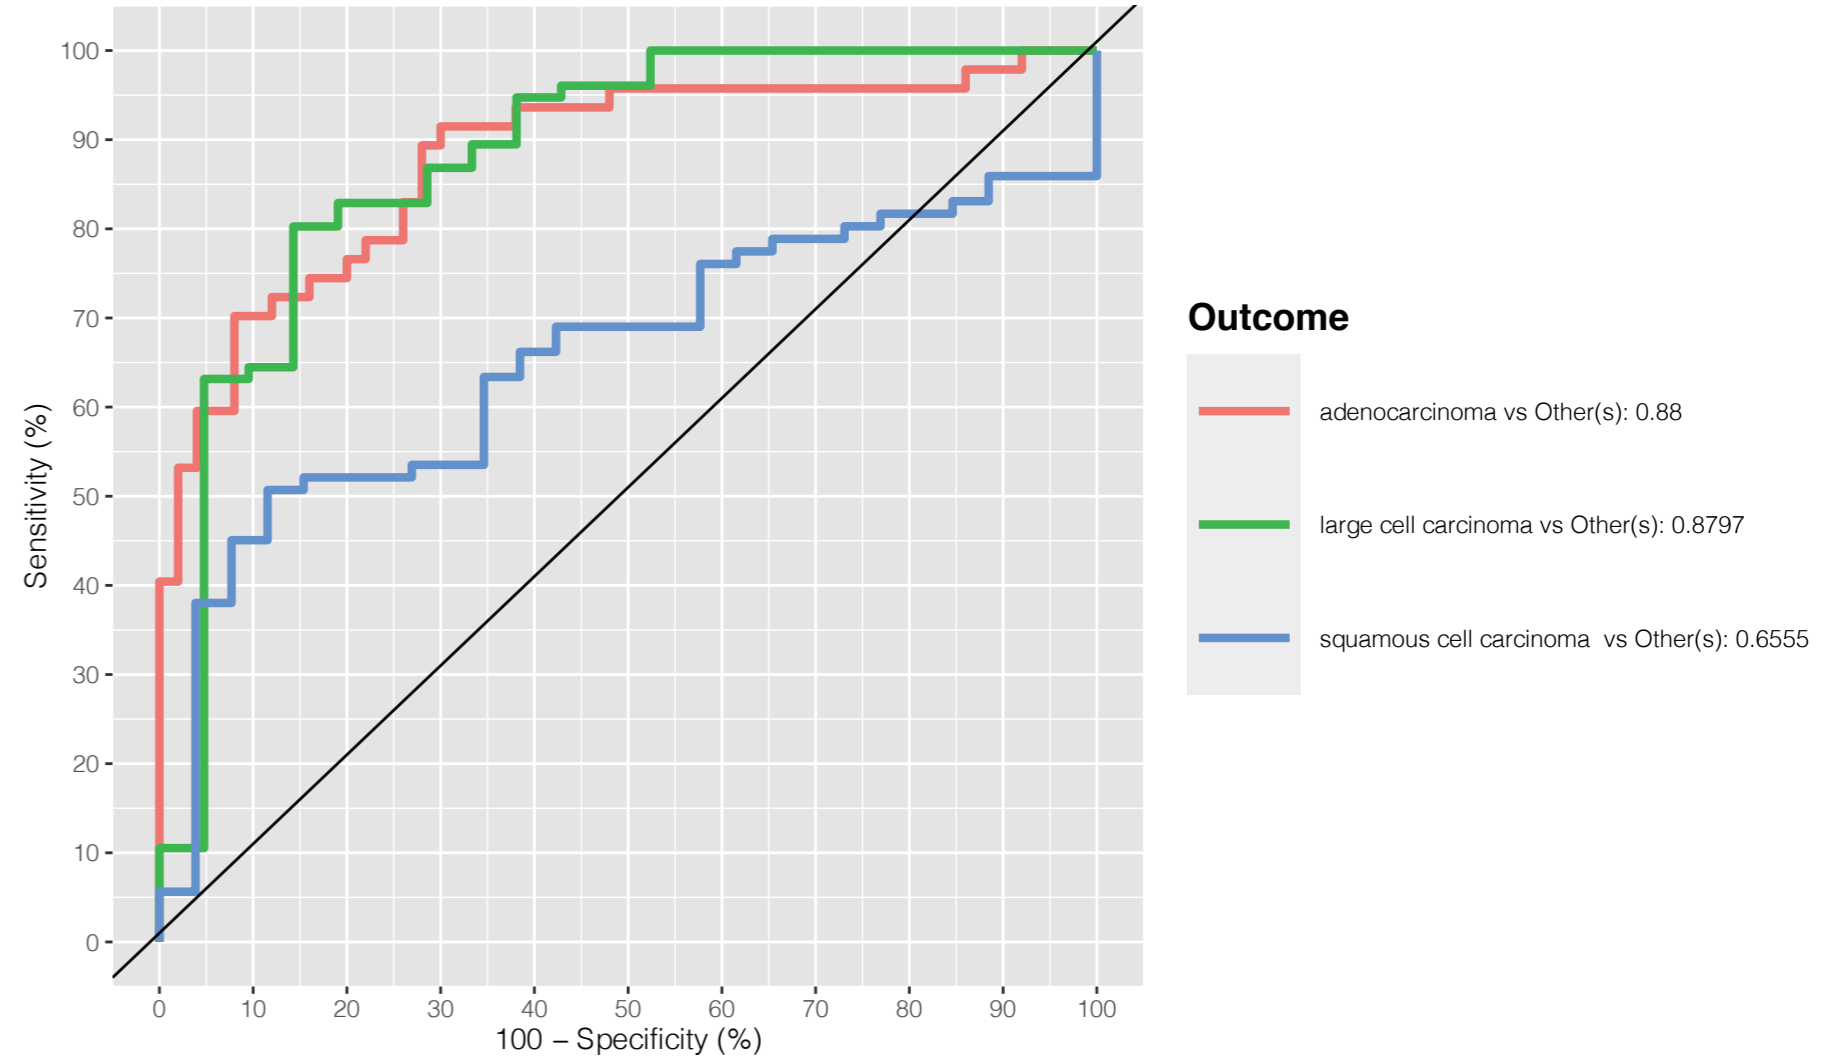

ROC Curve module 5

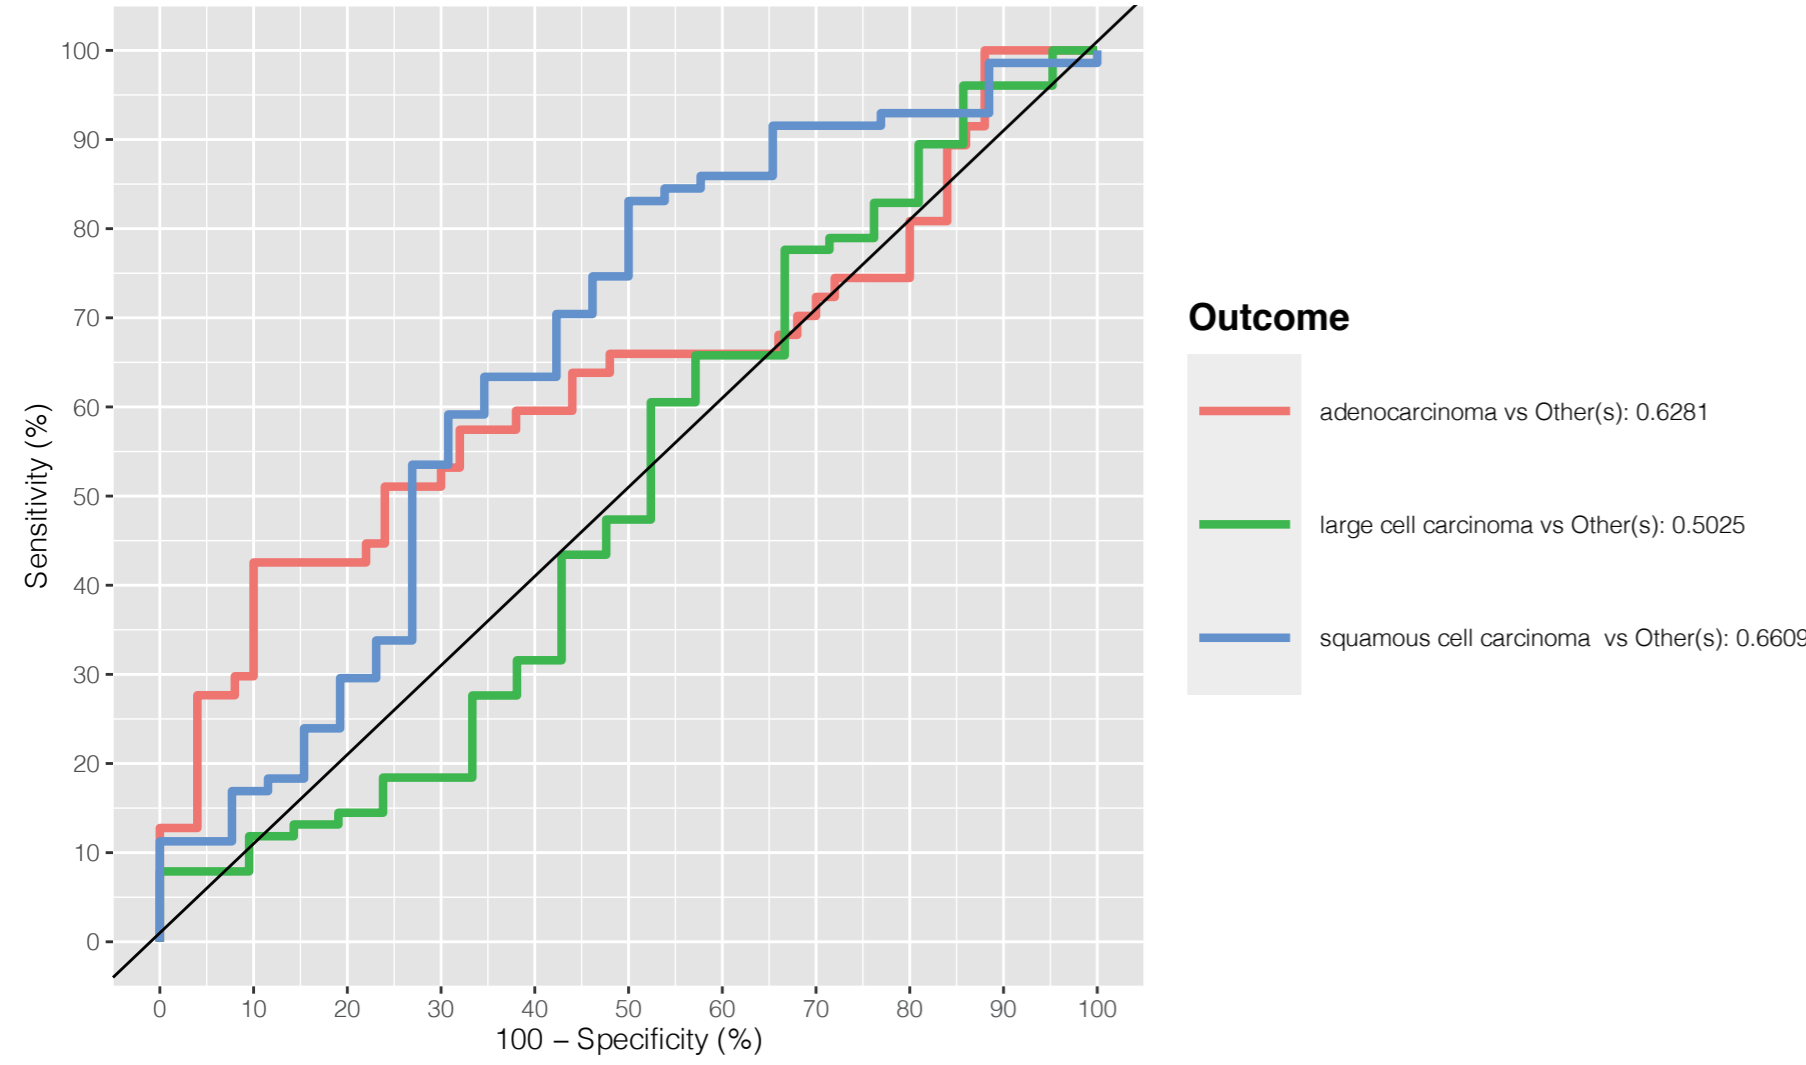

ROC Curve module 6

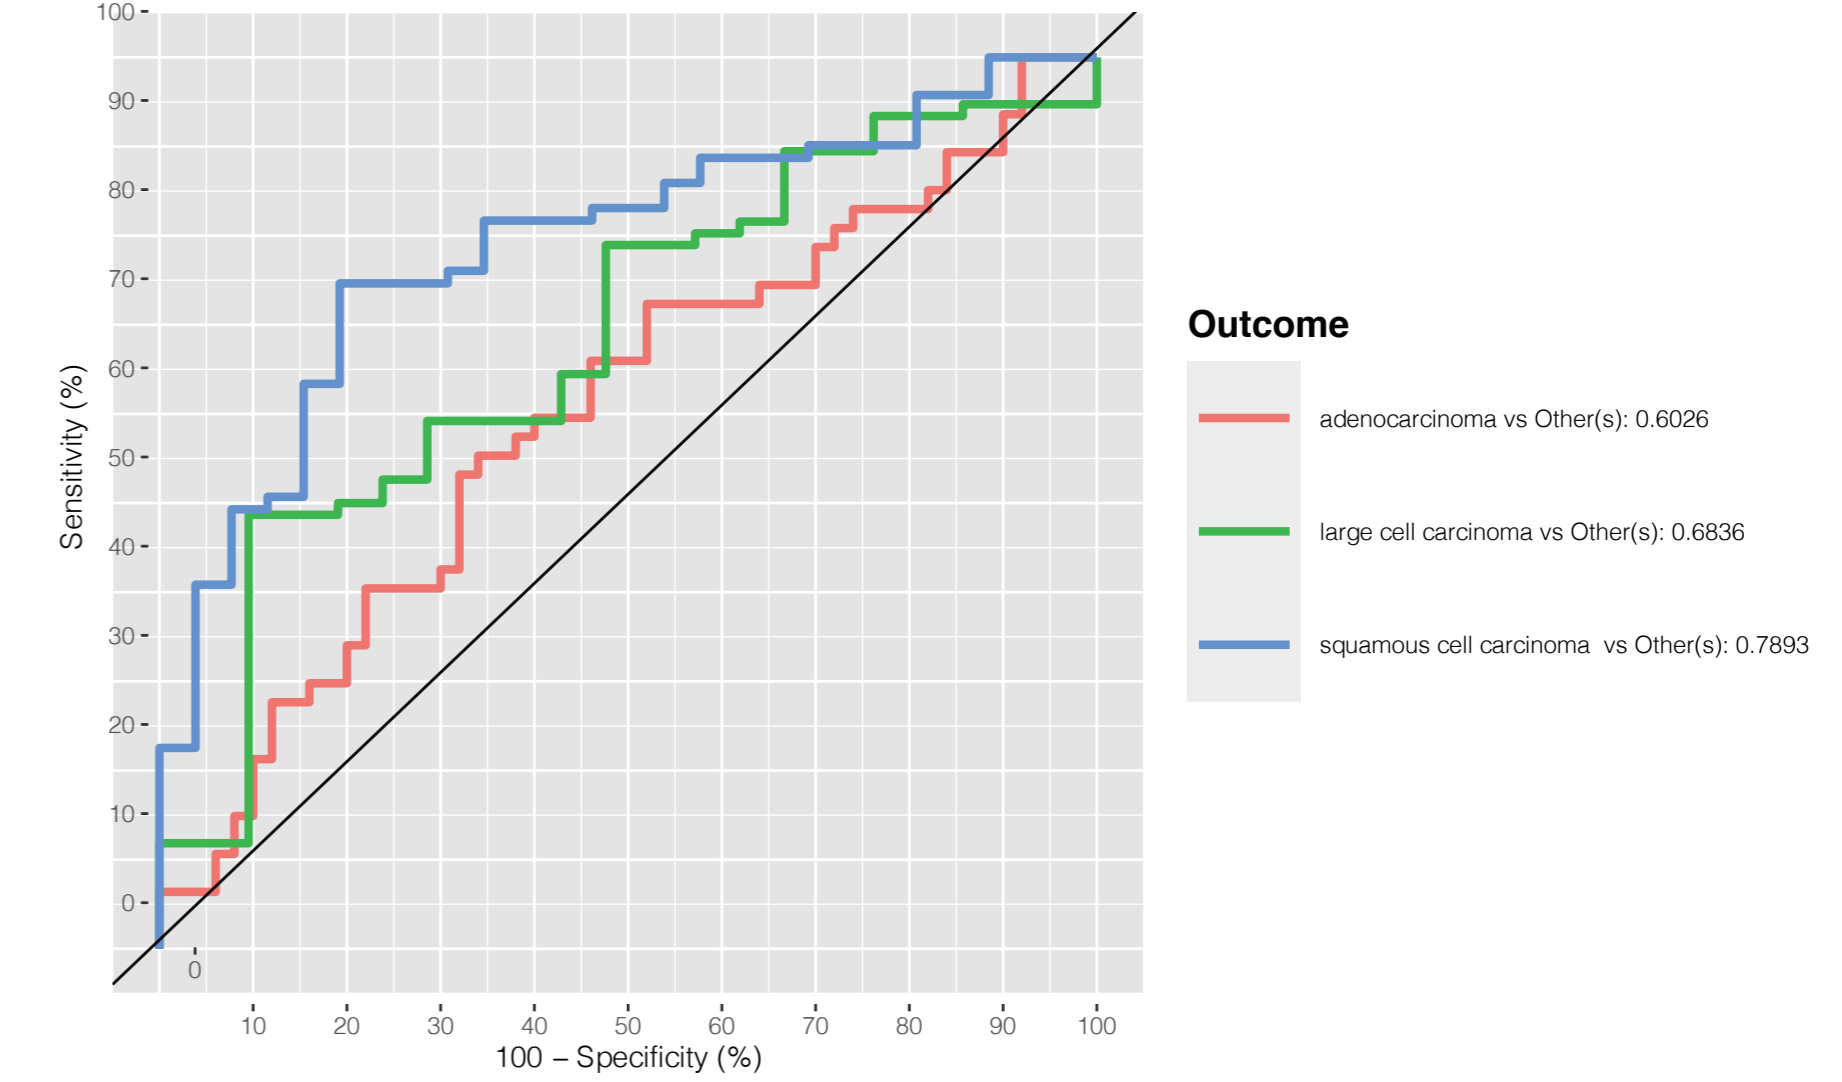

ROC Curve module 7

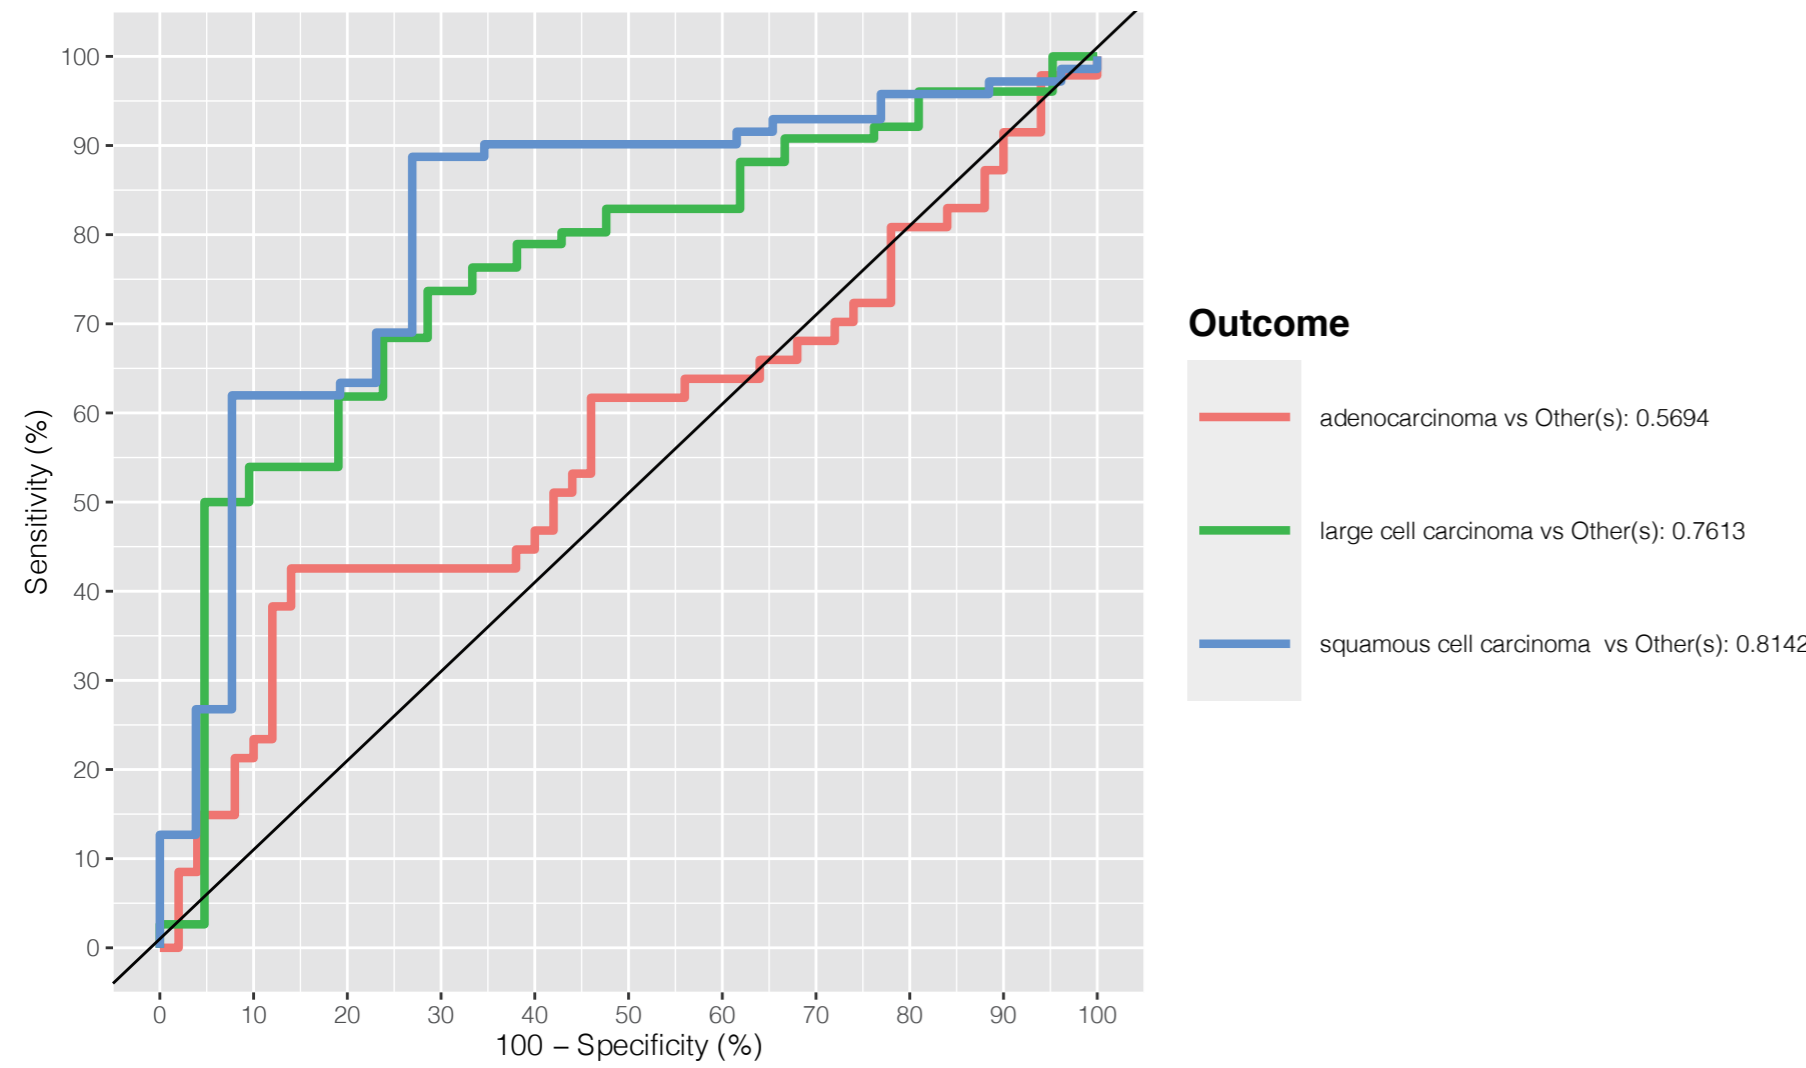

ROC Curve module 8

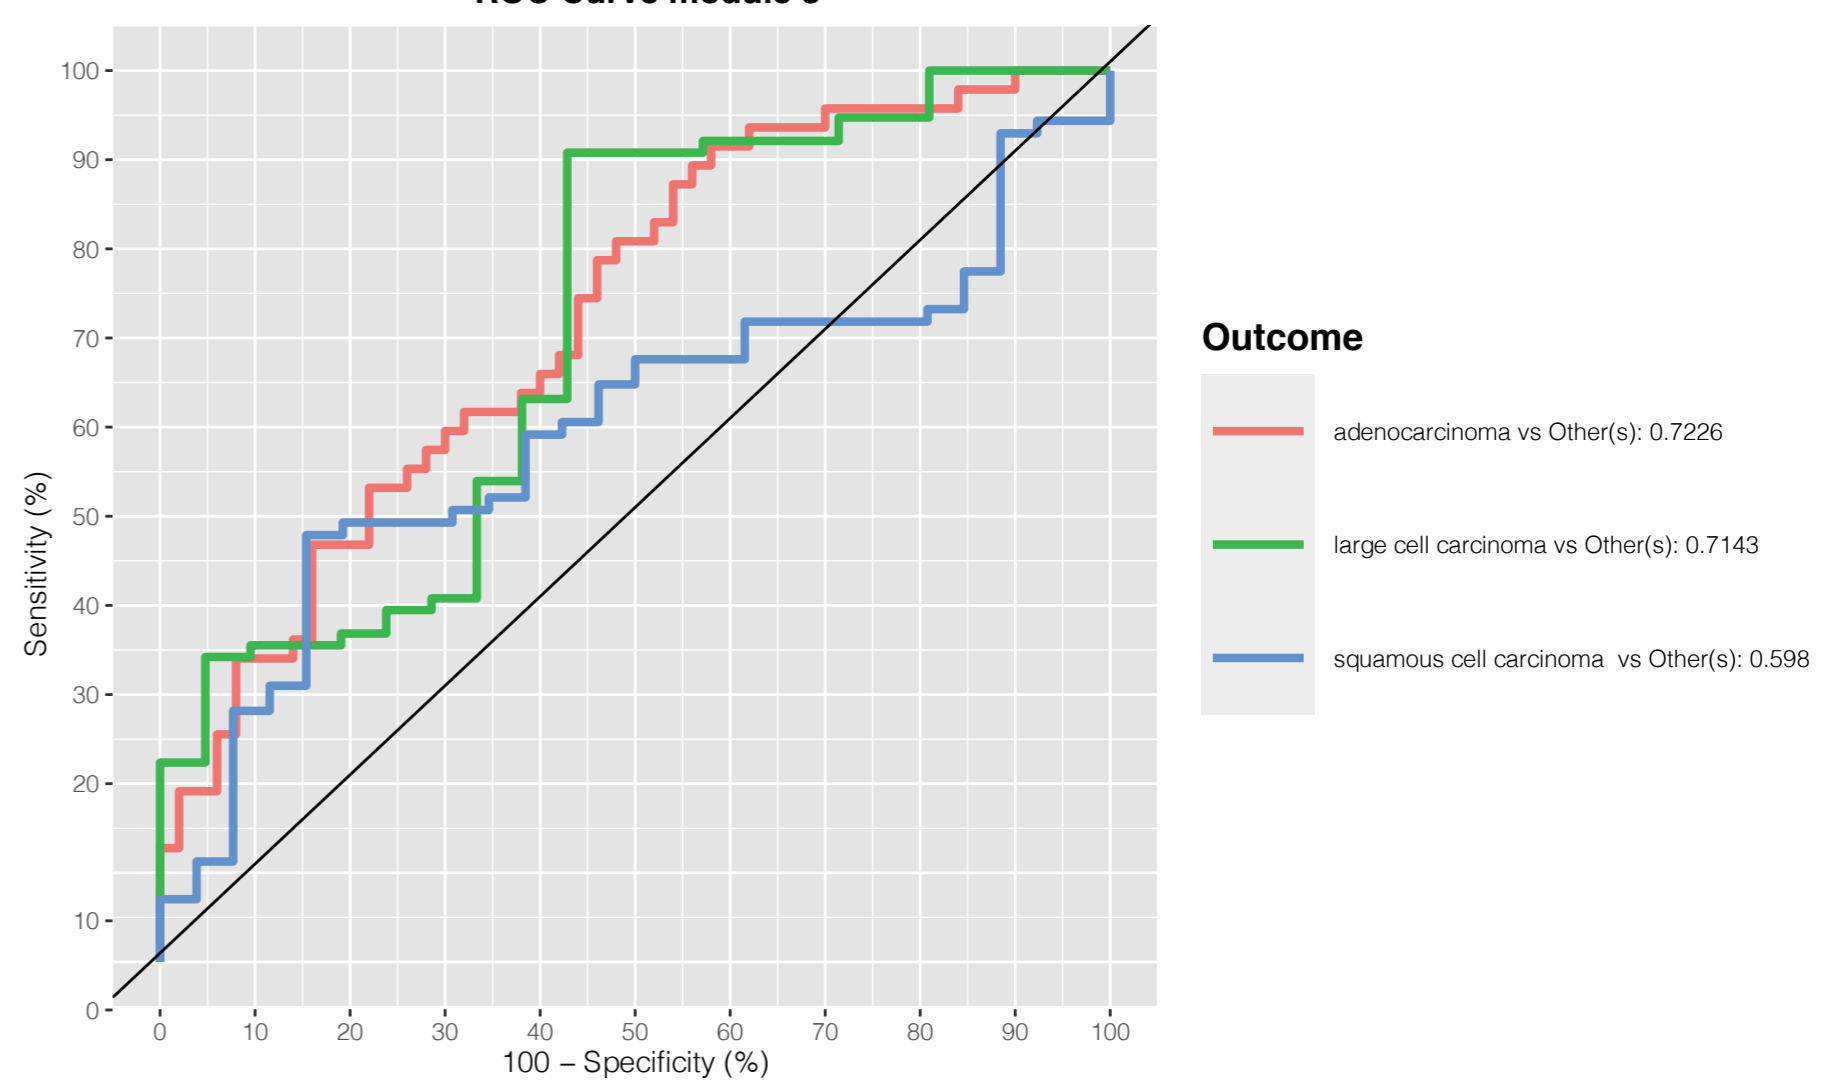

ROC Curve module 9

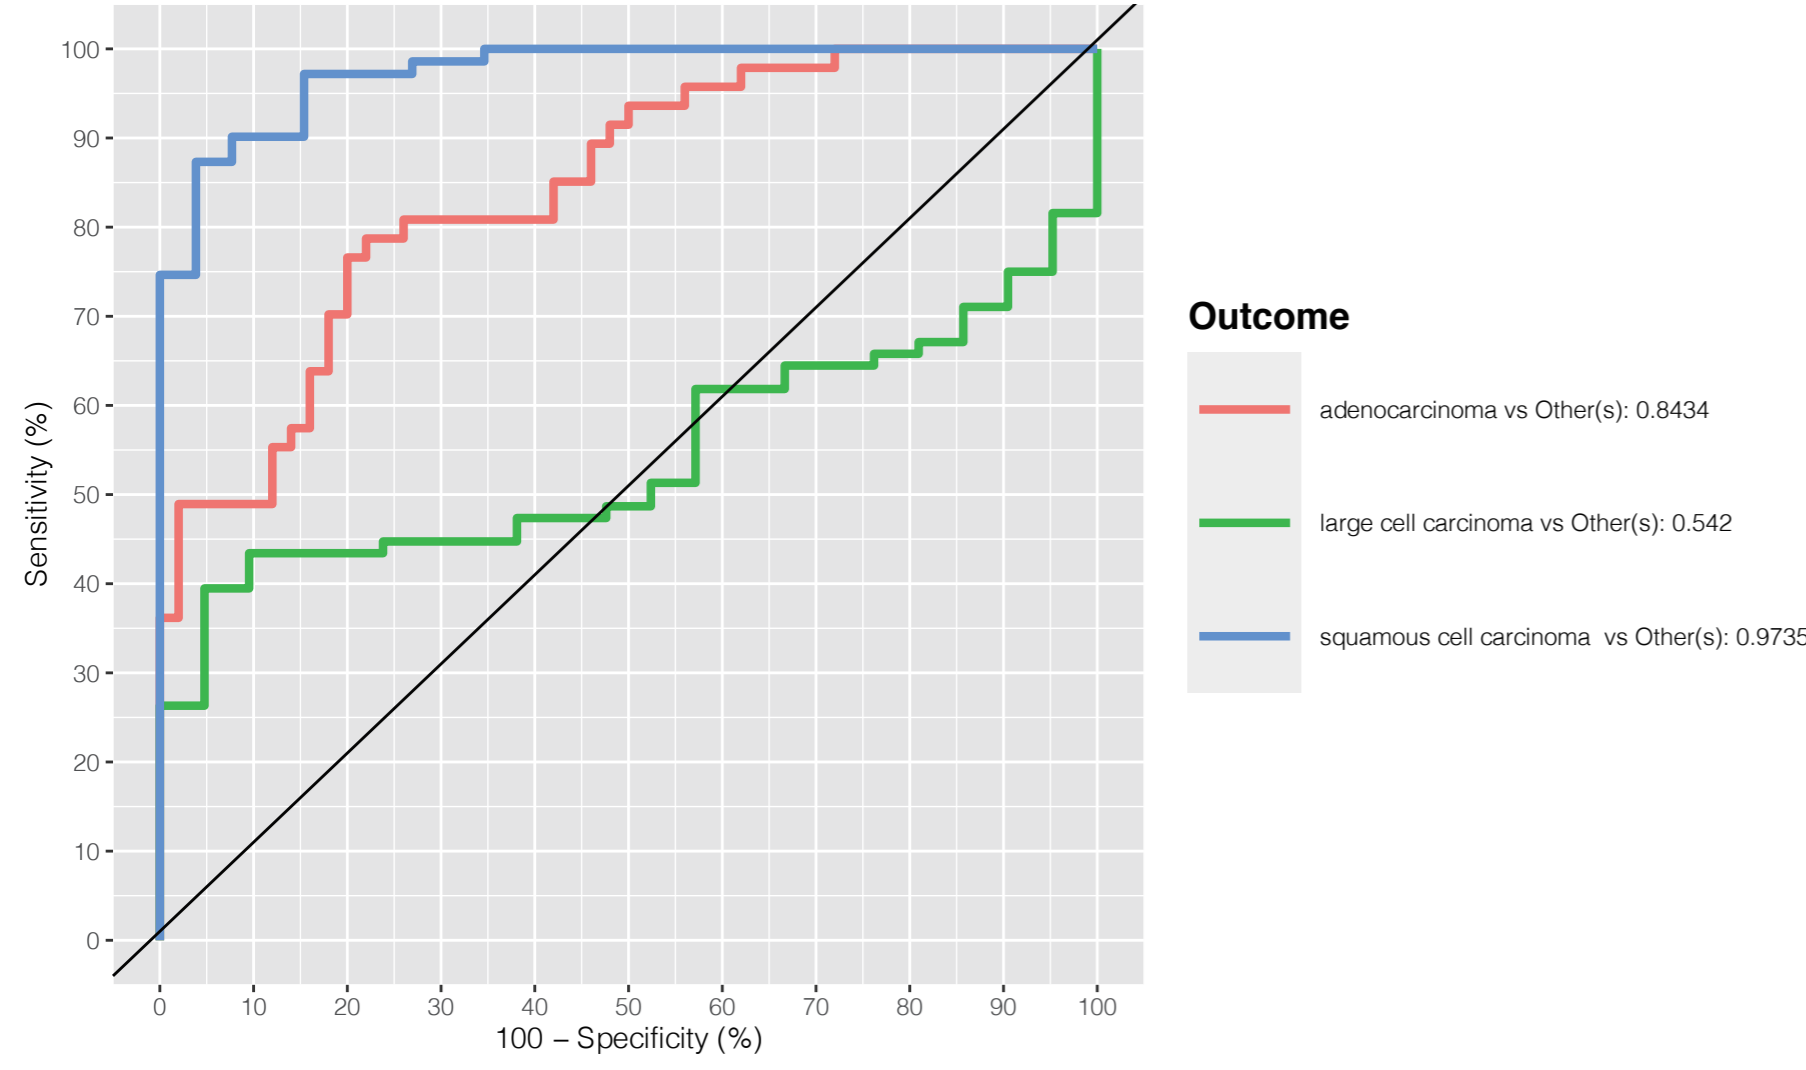

ROC Curve module 10

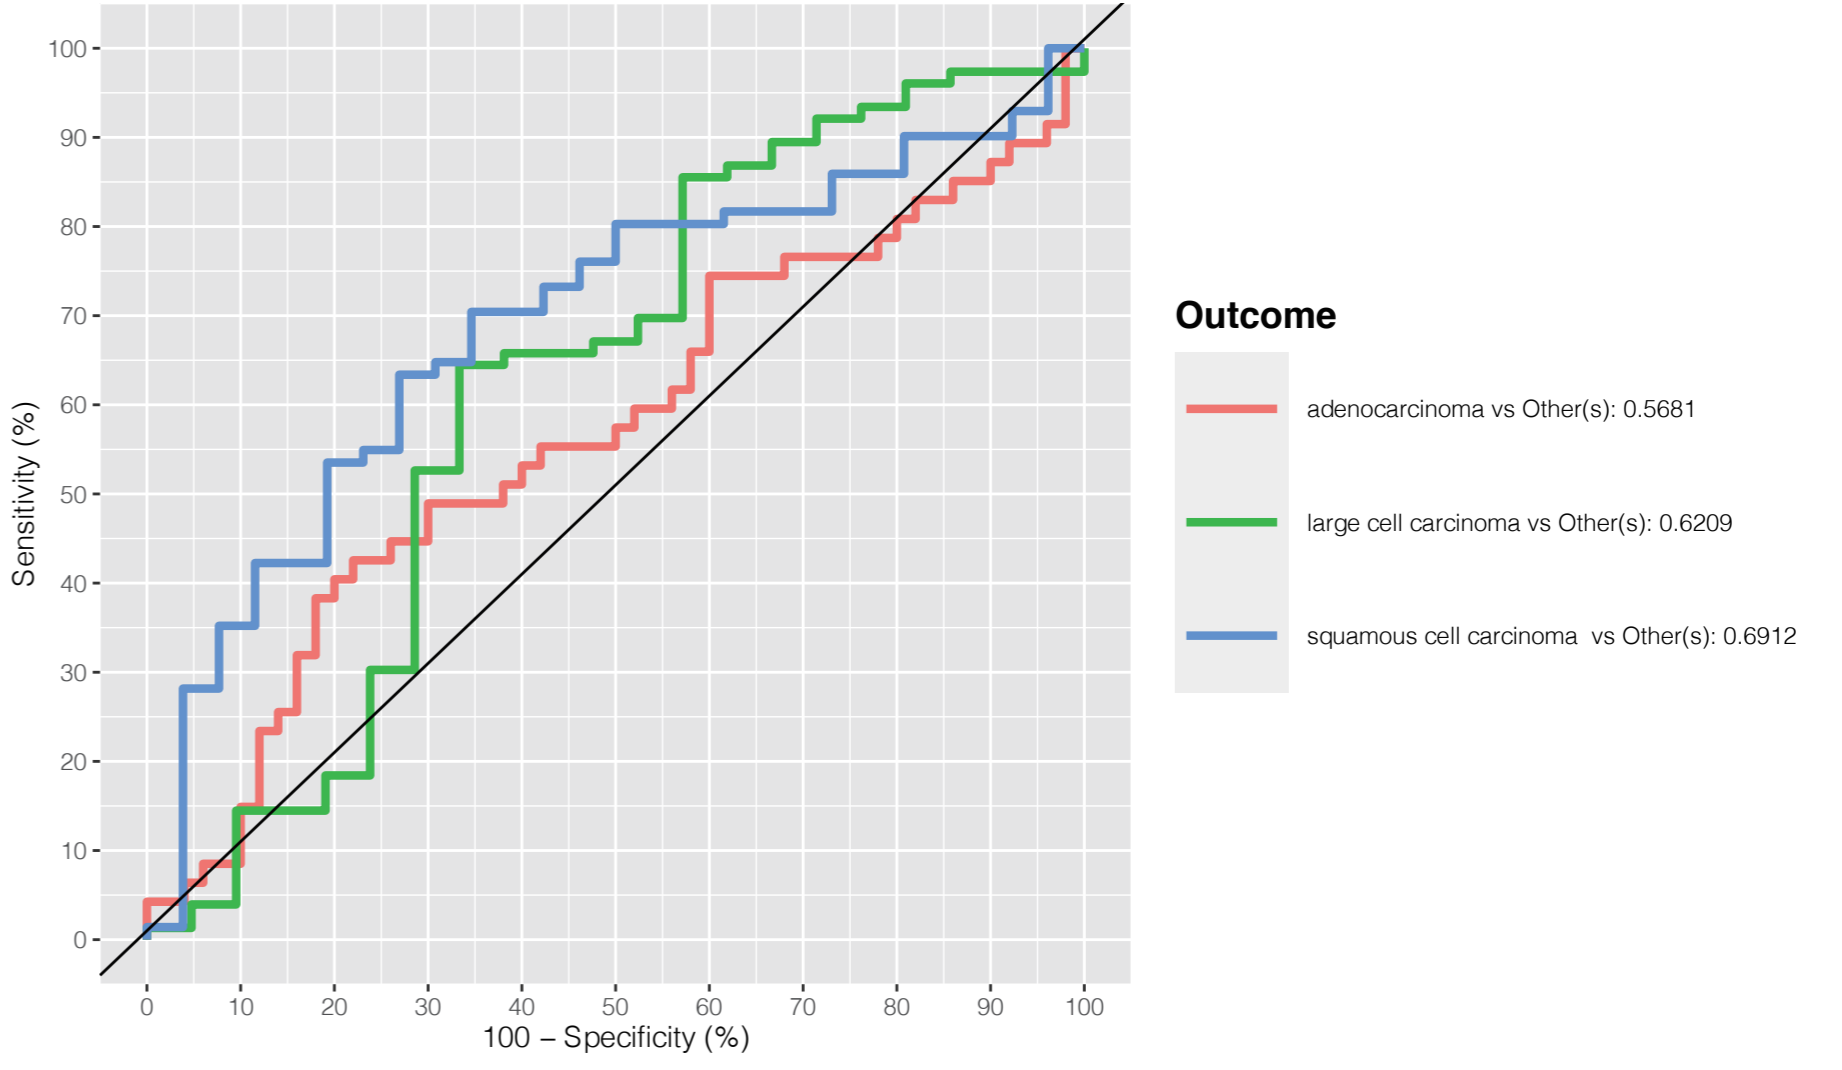

Supplement: Data_Sheet_1.ZIP [file Data_Sheet_1.ZIP]
