# Supplementary material for: Interpreting Functional Impact of Genetic Variations by Network QTL for Genotype–Phenotype Association Study
Source: Frontiers journal article supplement (doi:10.3389/fcell.2021.720321), 2022-01-26
Supplement: Data_Sheet_1.ZIP [file Data_Sheet_1.ZIP]

**(A)**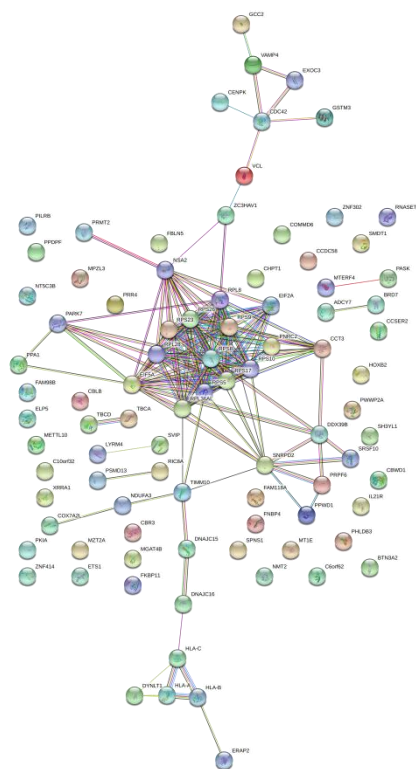

**eQTL: gene-network of top-100 genes**

Number of nodes:90

Number of edges:147

Average node degree:3.27

Avg. local clustering coefficient:0.427

Expected number of edges:65

PPI enrichment p-value:<1.0e-16

**(B)**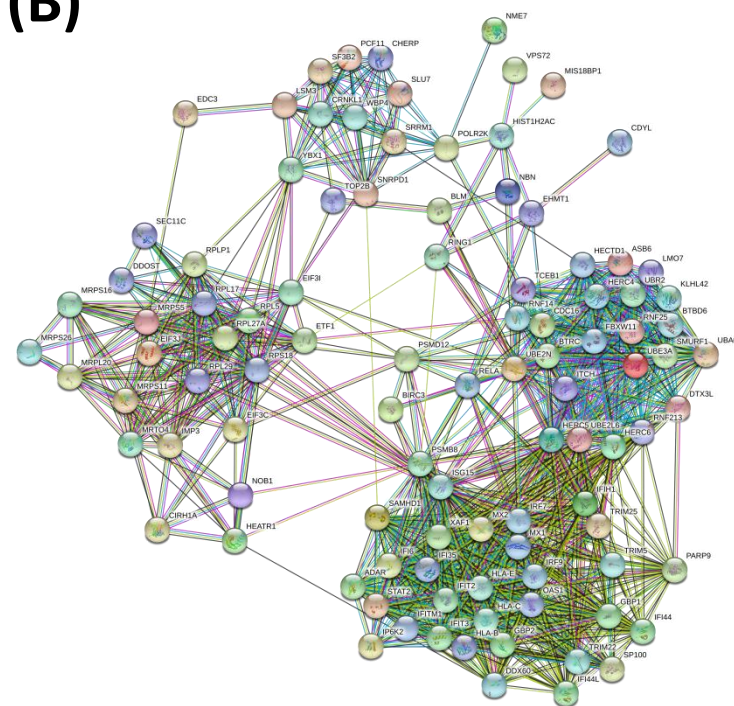

**nQTL: gene-network top-100 genes**

Number of nodes:103

Number of edges:1024

Average node degree:19.9

Avg. local clustering coefficient:0.746

Expected number of edges:220

PPI enrichment p-value:< 1.0e-16
