# Supplementary material for: Interpreting Functional Impact of Genetic Variations by Network QTL for Genotype–Phenotype Association Study
Source: Frontiers journal article supplement (doi:10.3389/fcell.2021.720321), 2022-01-26
Supplement: Data_Sheet_1.ZIP [file Data_Sheet_1.ZIP]

Ovarian - Ovarian Meta-base: 6 cohorts 22K genes (runweb v1.13 Sep/11/11/2015) 2019-04-09 02:34

Ovarian - Ovarian Meta-base: 6 cohorts 22K genes (runwebz v1.13 Sep/11/2015) 2019-04-09 03:12

[Ovarian - Ovarian Meta-base: 6 cohorts 22K genes](#)
(runweb.r v1.13 Sep/11/2015) 2019-04-09 03:00

Ovarian - Ovarian Meta-base: 6 cohorts 22K genes (runweb: v1.13 Sep/11/2015) 2019-04-09 02:23

Ovarian - Ovarian Meta-base: 6 cohorts 22K genes (numchr v1.13 Sep 11 2015) 2019-04-09 03:11

Ovarian - Ovarian Meta-base: 6 cohorts 22K genes (pubmed v1.13 Sep/11/2015) 2019-04-09 03:00

Ovarian - Ovarian Meta-base: 6 cohorts 22K genes (runweb.r v1.13 Sep'11/1/2015) 2019-04-09 02:36

Ovarian - Ovarian Meta-base: 6 cohorts 22K genes (pubmed v1.13 Sep/11/2015) 2019-04-08 02:41

Ovarian - Ovarian Meta-base: 6 cohorts 22K genes (runwebr.vt.13 Sep(11) 2015) 2019-04-09 02:21

Ovarian - Ovarian Meta-base: 6 cohorts 22K genes (runweb v1.13 Sep'11/2015) 2019-04-09 02:44
