# Supplementary figures and images for: Interpreting Functional Impact of Genetic Variations by Network QTL for Genotype–Phenotype Association Study
Source: Frontiers journal article supplement (doi:10.3389/fcell.2021.720321), 2022-01-26

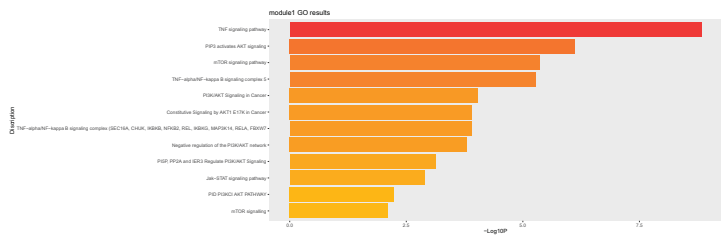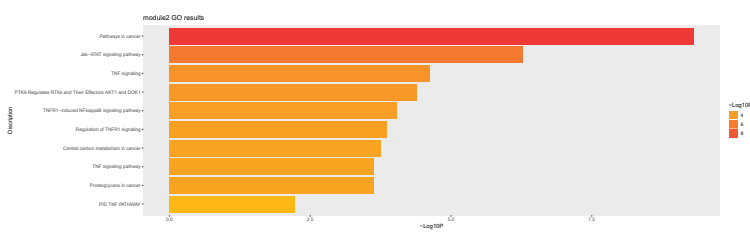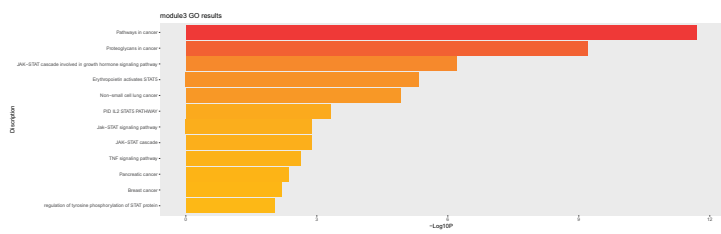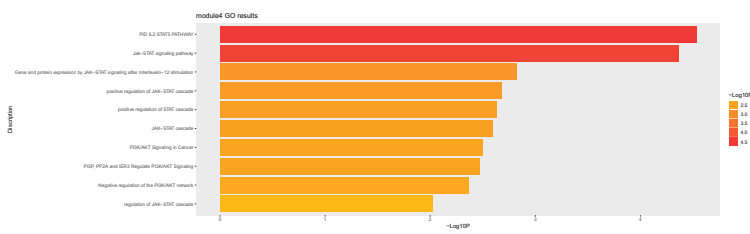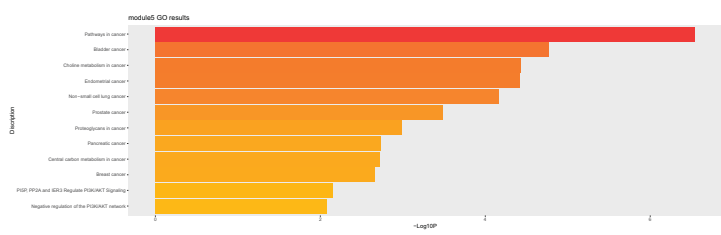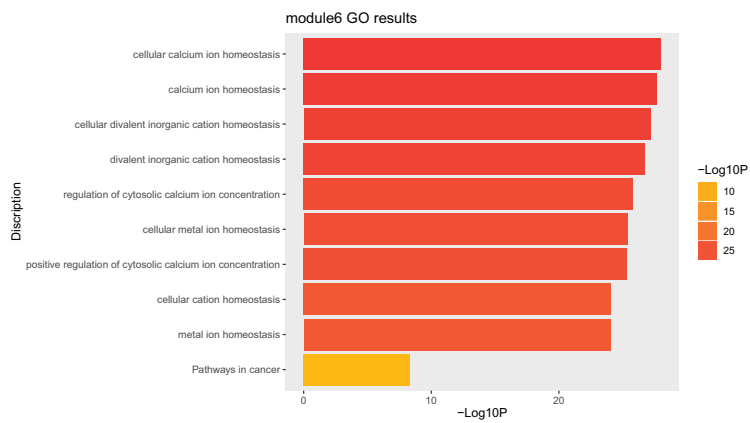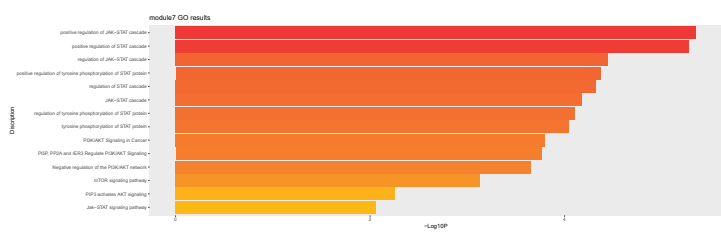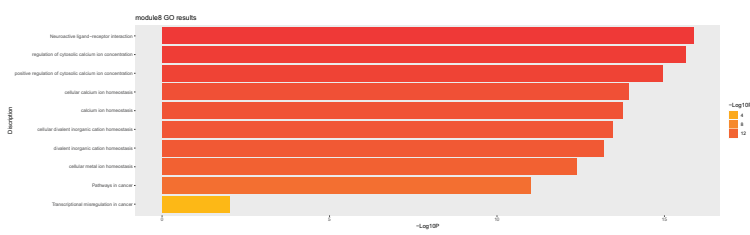

Supplement: Data_Sheet_1.ZIP [file Data_Sheet_1.ZIP]

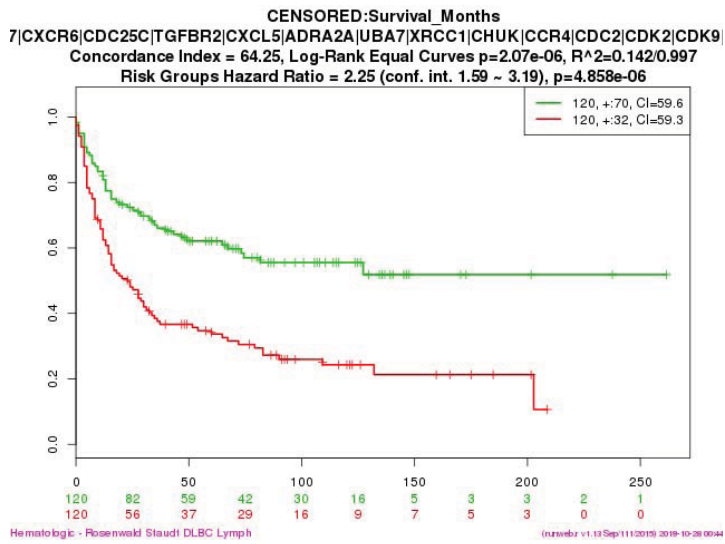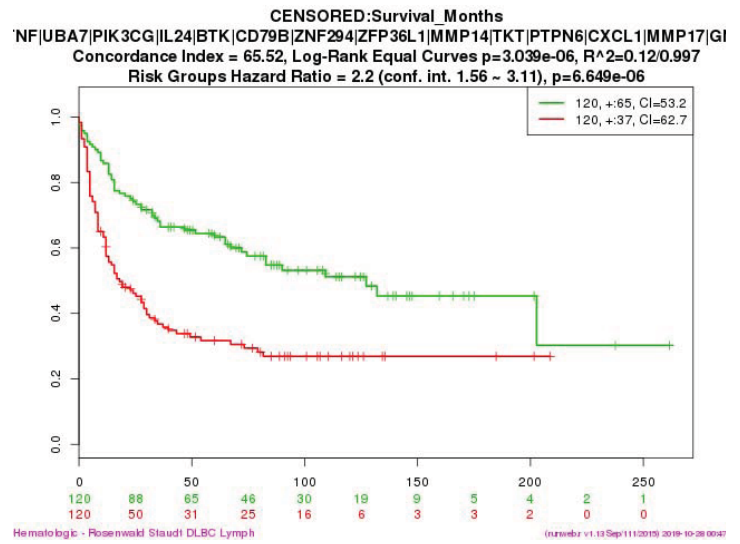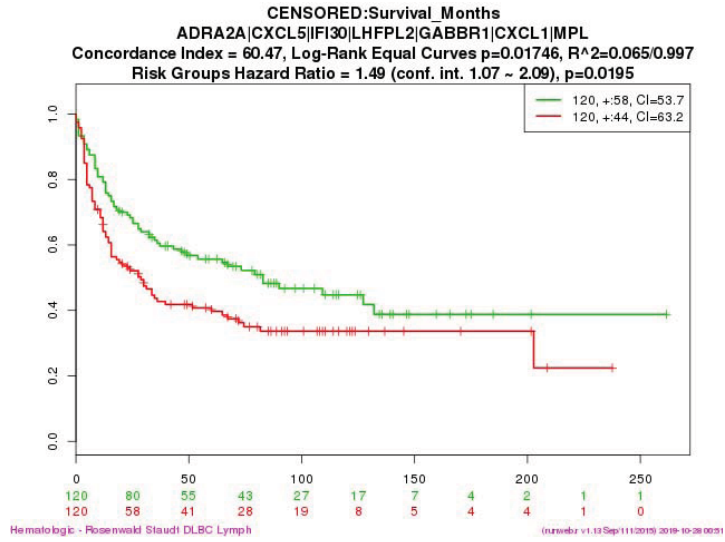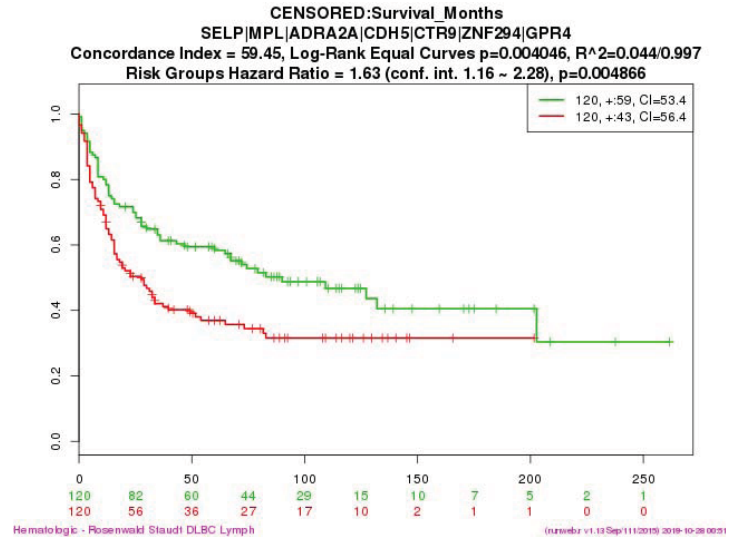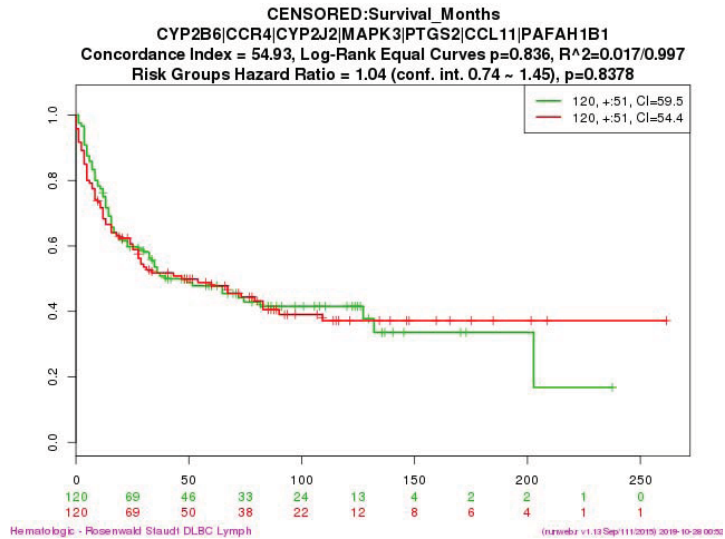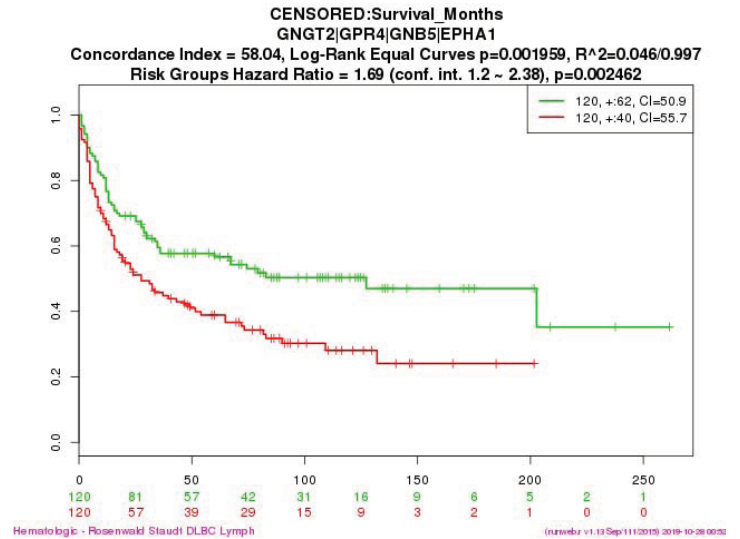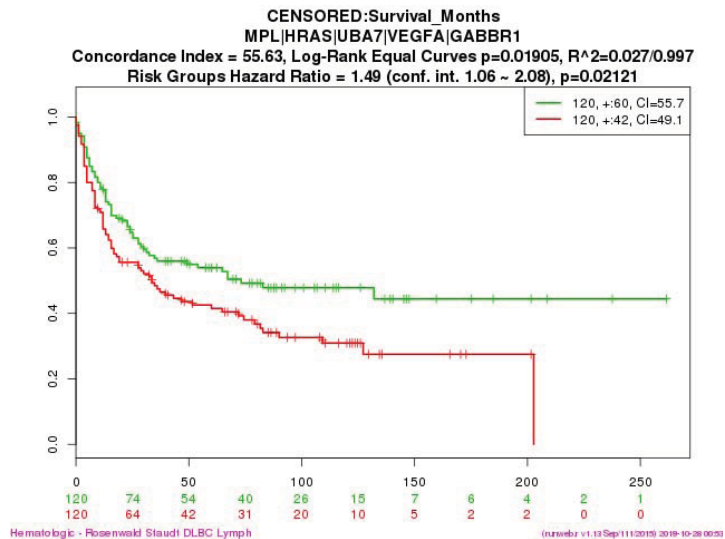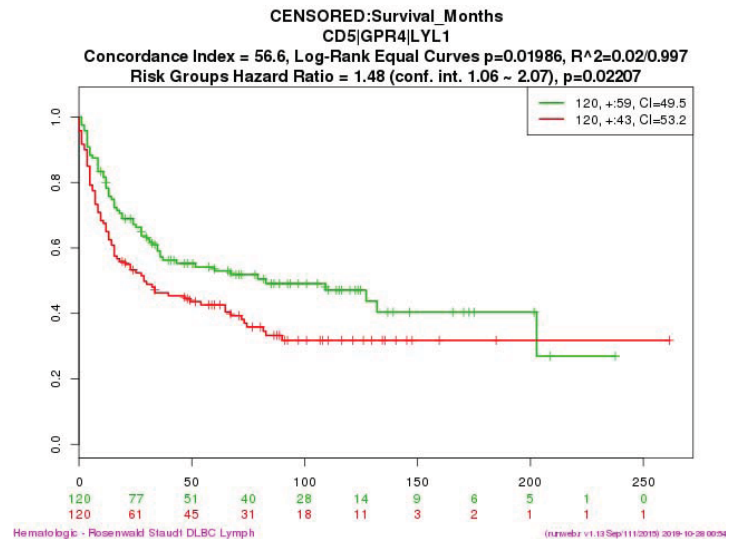

Supplement: Data_Sheet_1.ZIP [file Data_Sheet_1.ZIP]

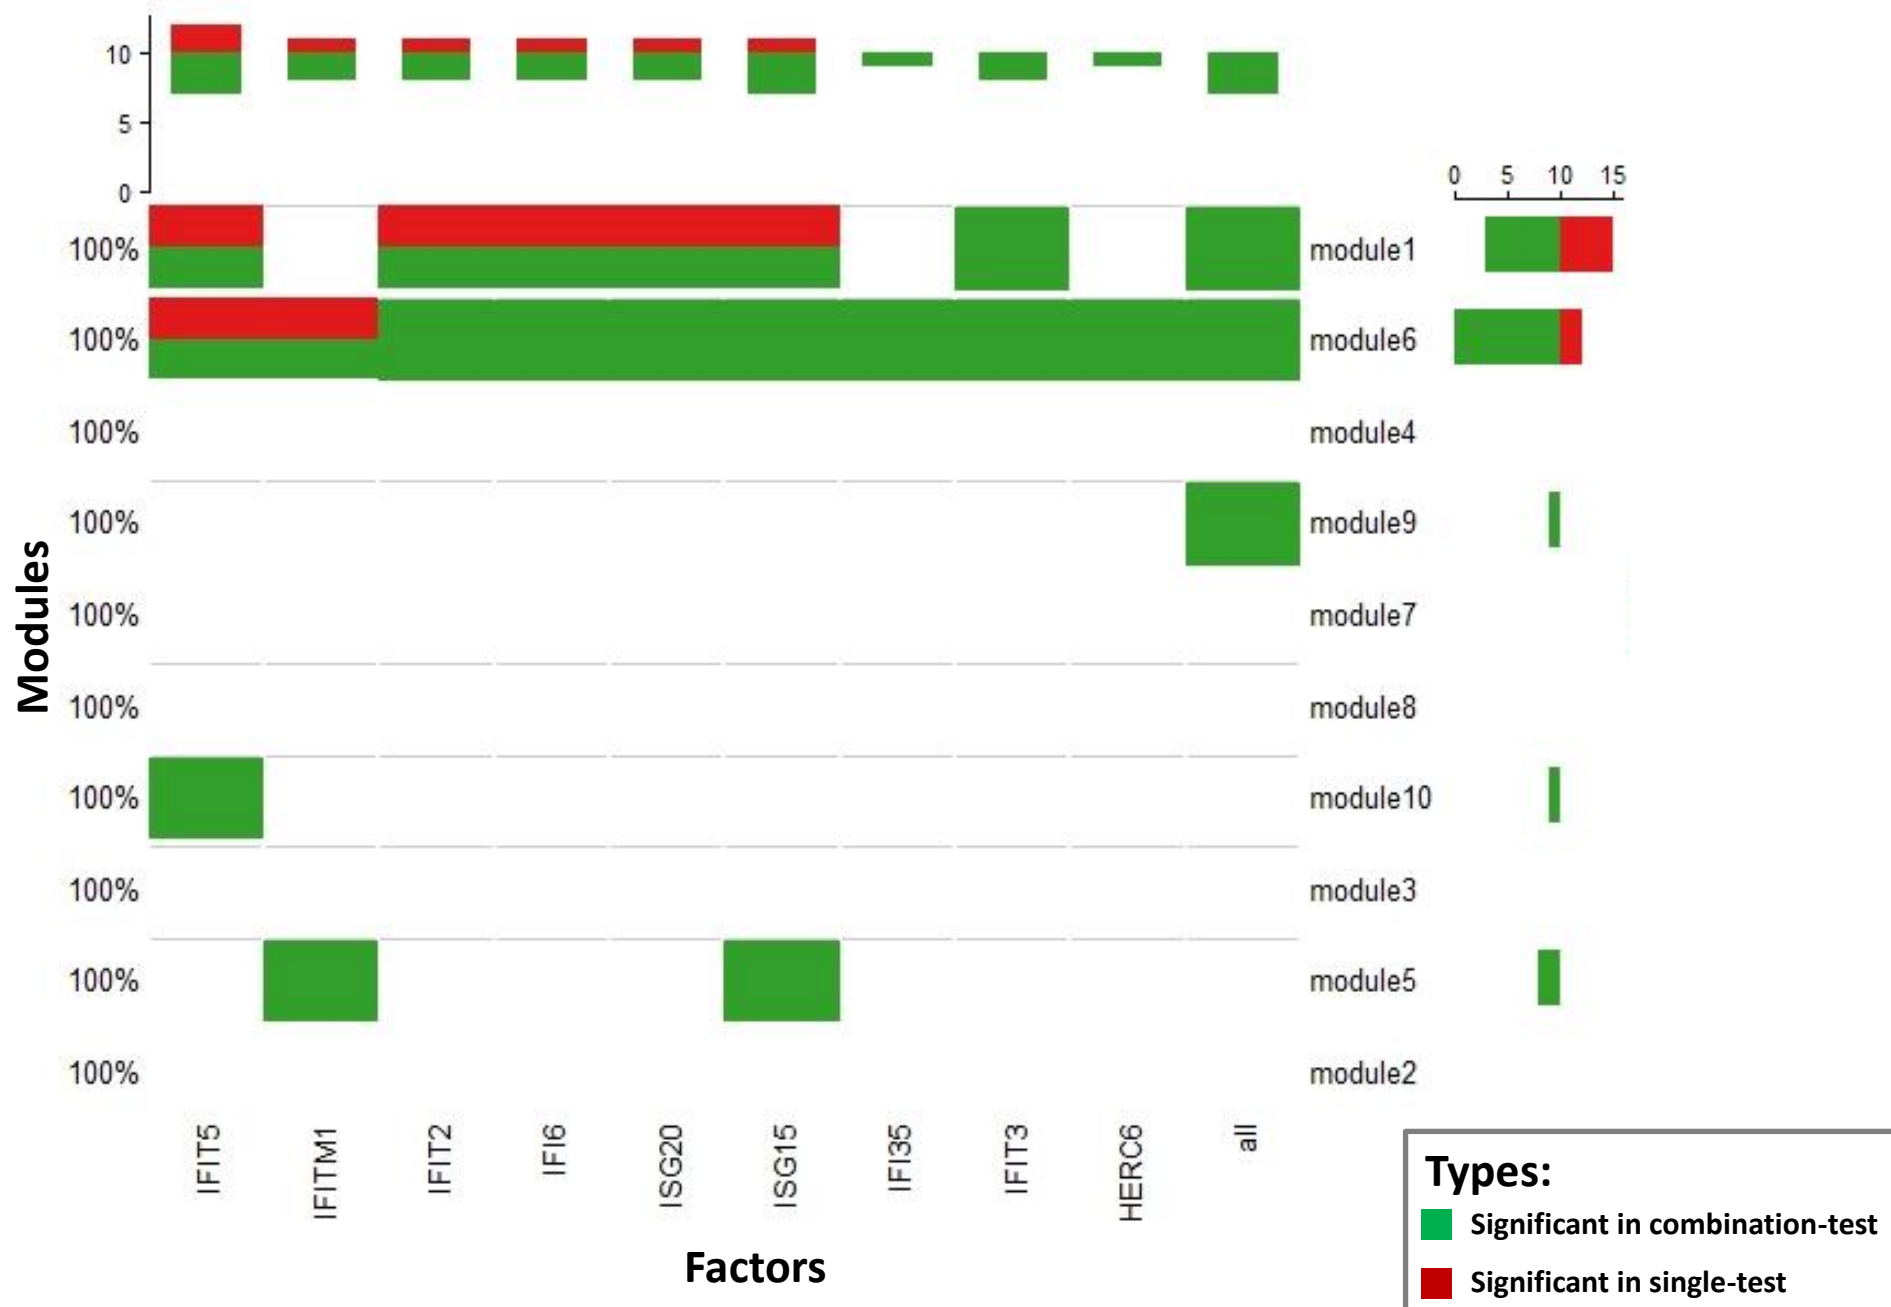

Supplement: Data_Sheet_1.ZIP [file Data_Sheet_1.ZIP]

Gene-pair & Snp association matrix

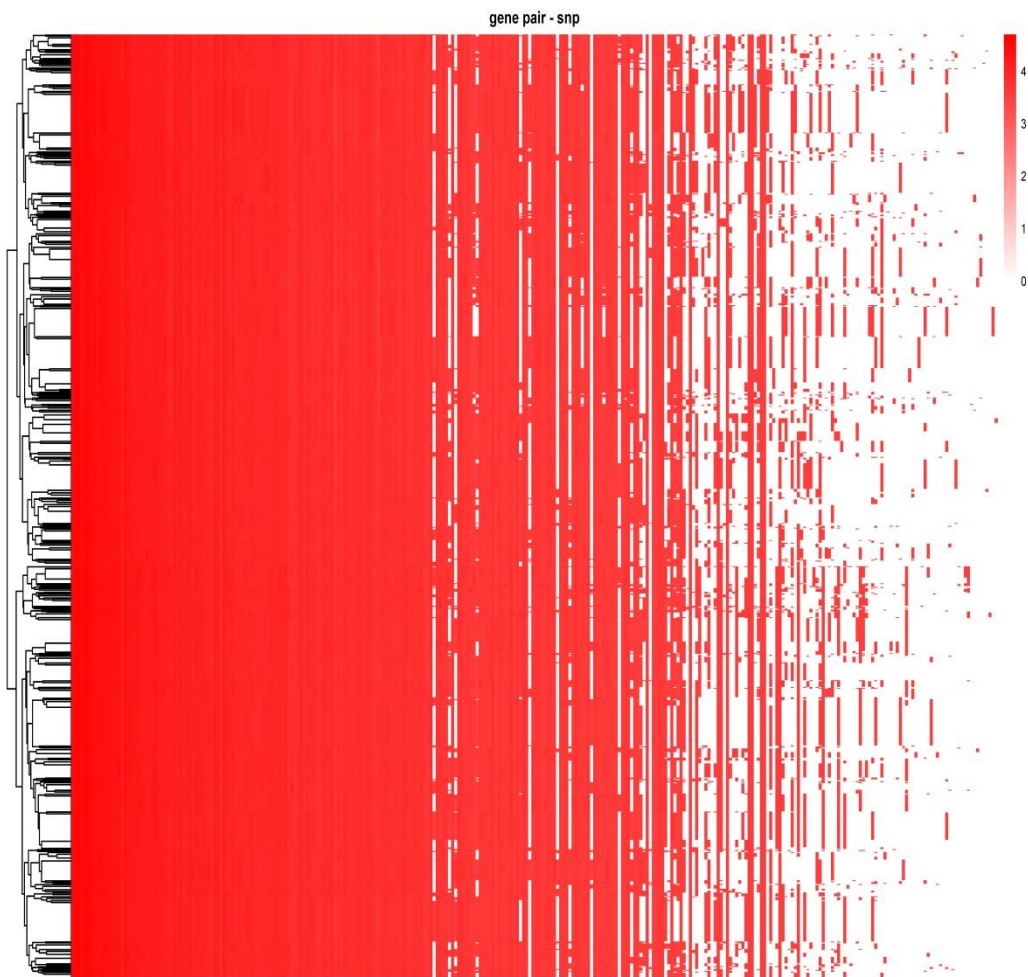

(A)

Gene-pair association matrix

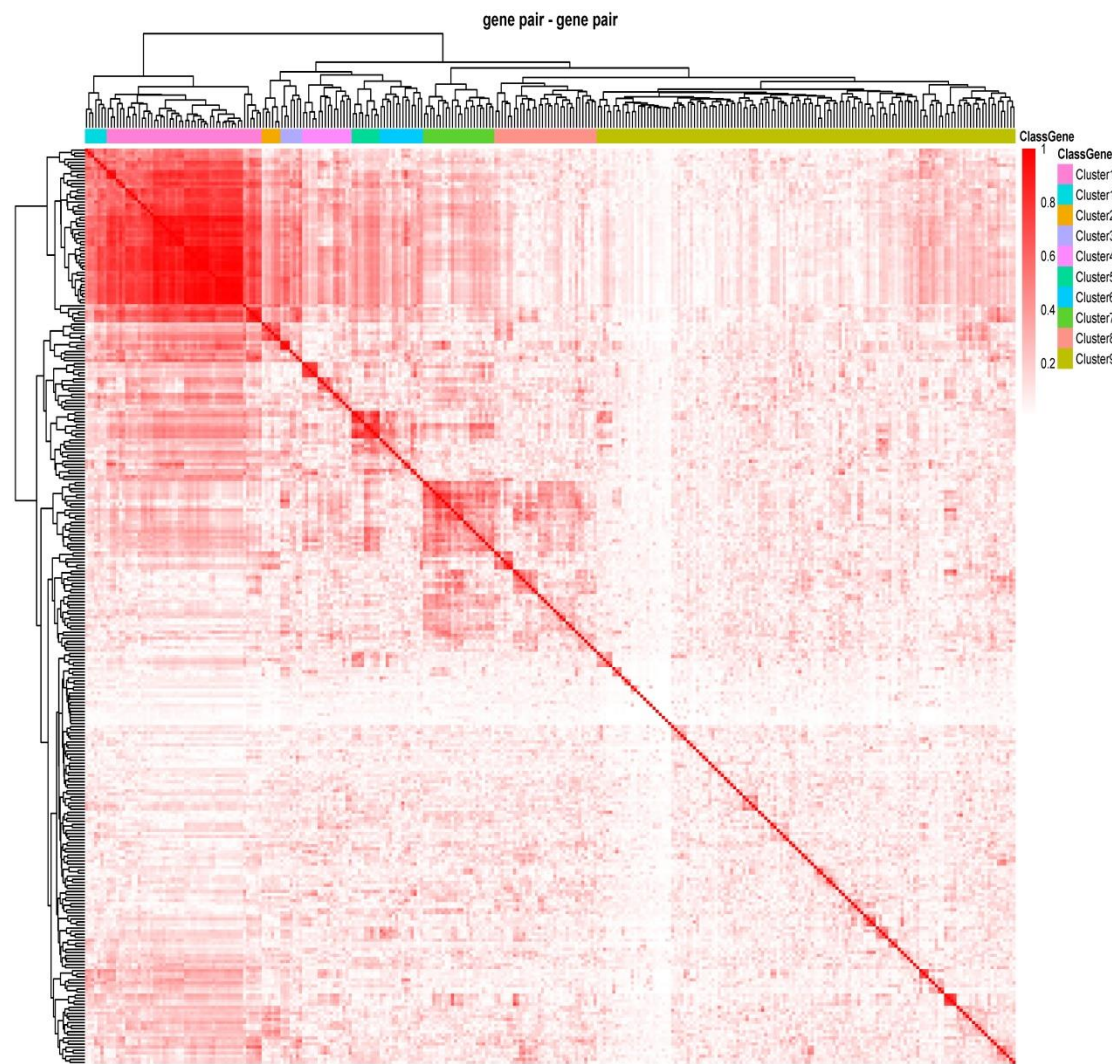

(B)

Supplement: Data_Sheet_1.ZIP [file Data_Sheet_1.ZIP]

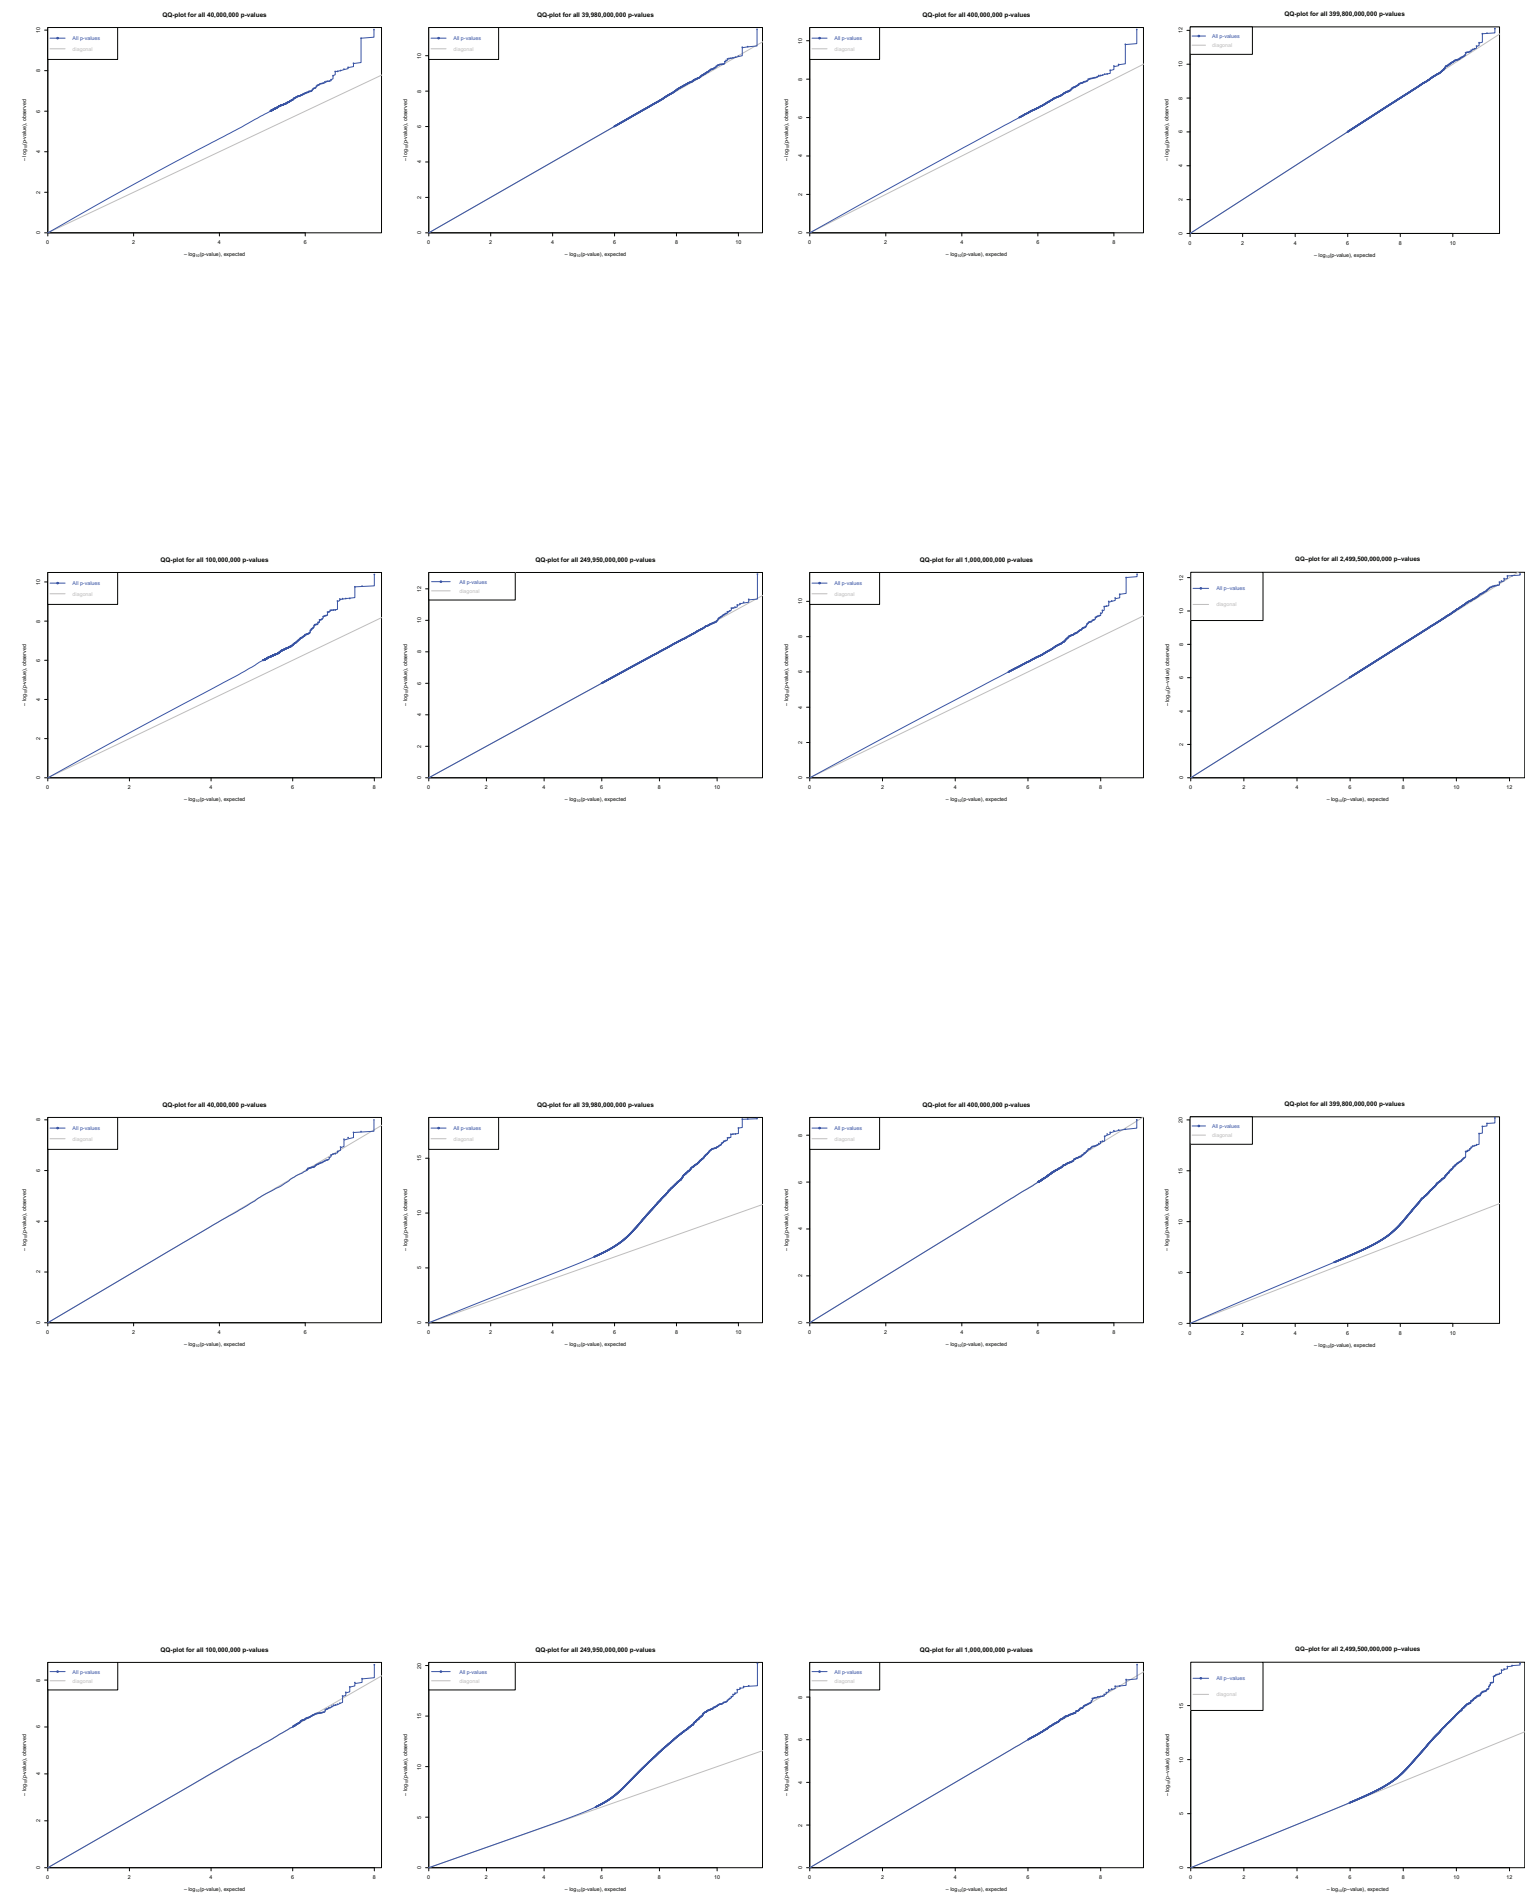

Supplement: Data_Sheet_1.ZIP [file Data_Sheet_1.ZIP]

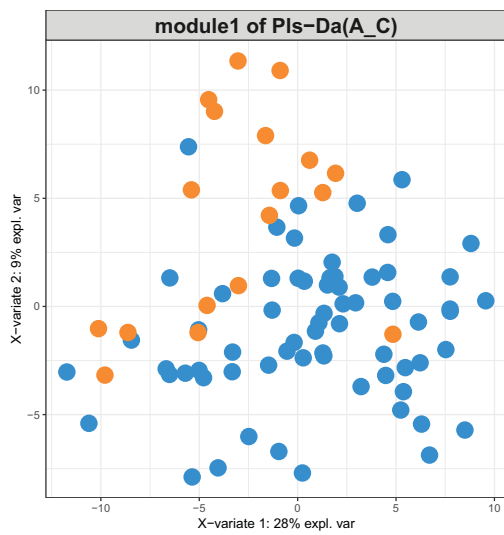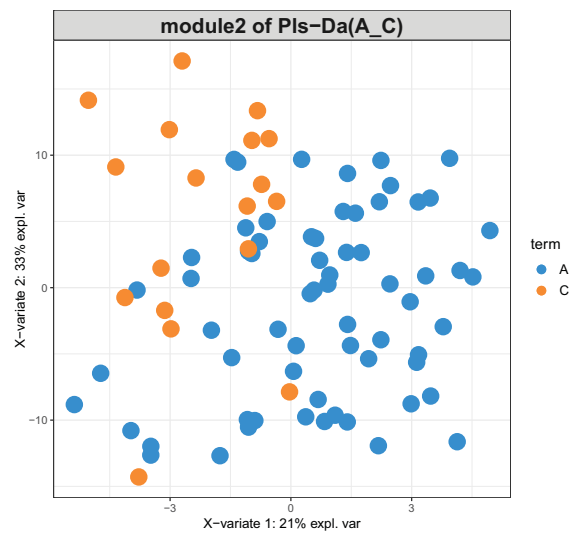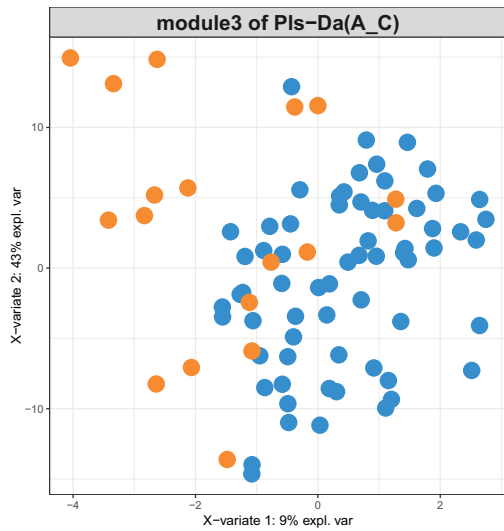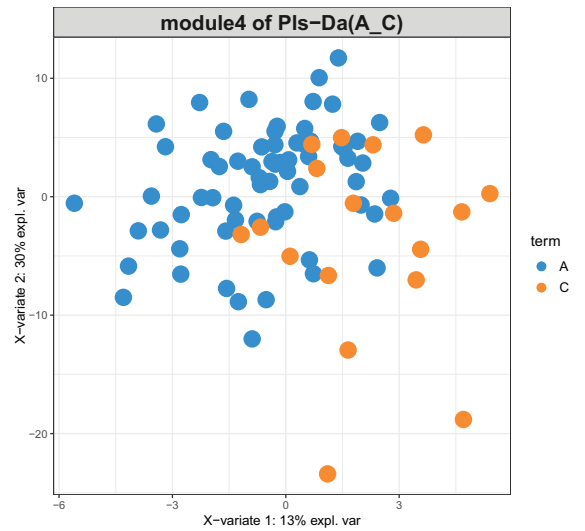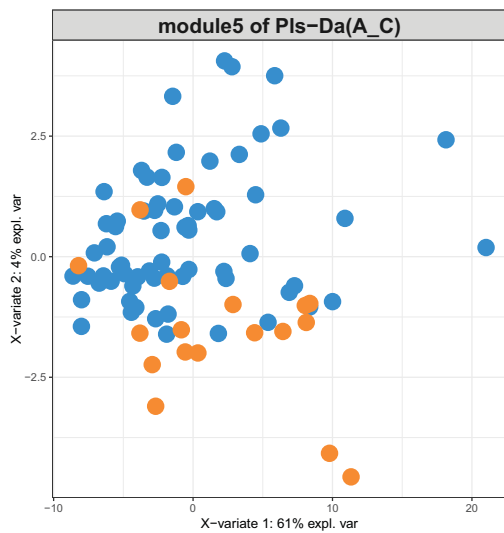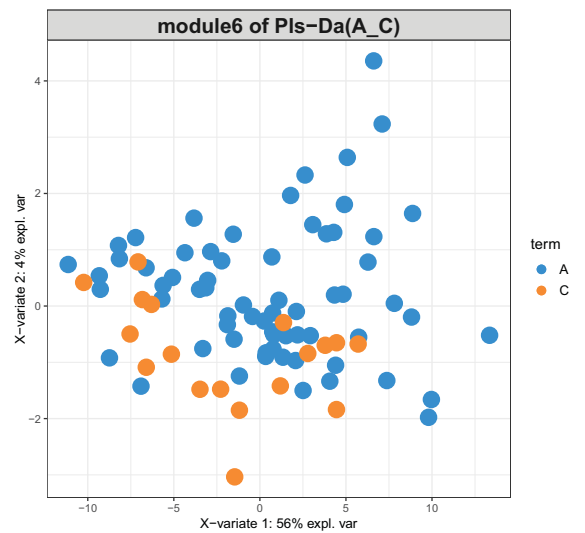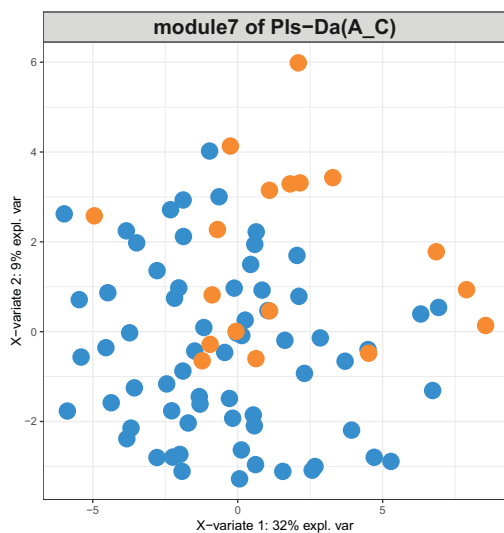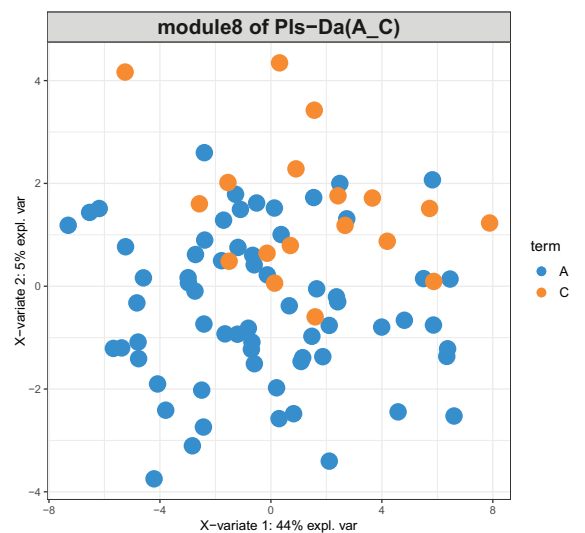

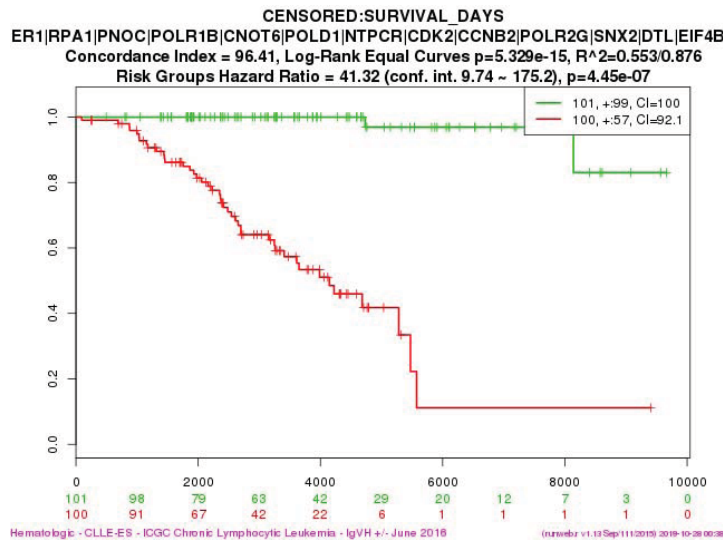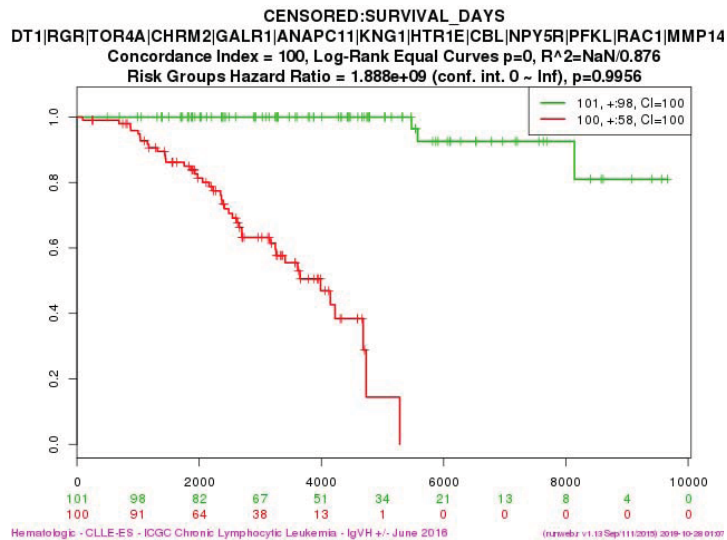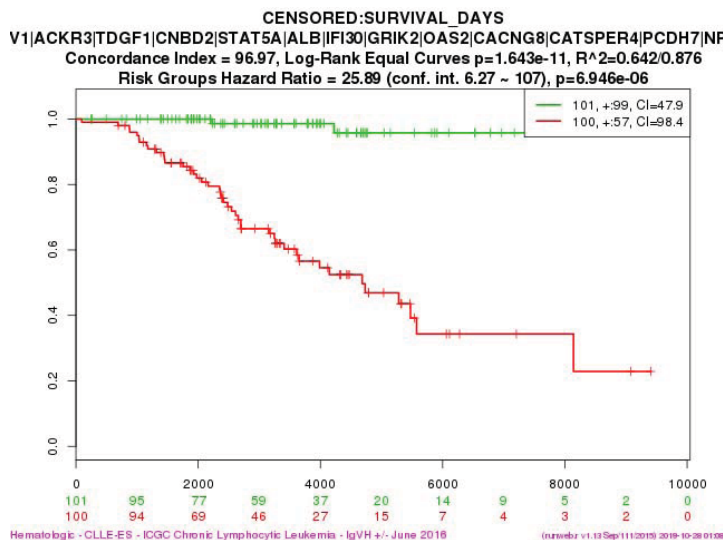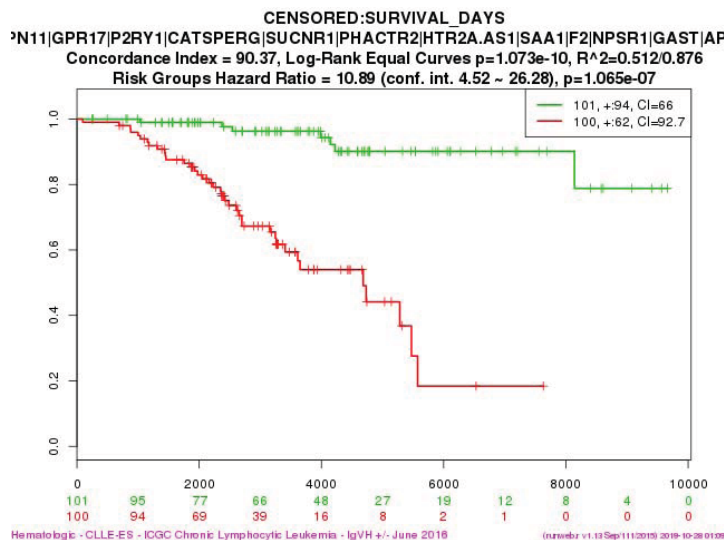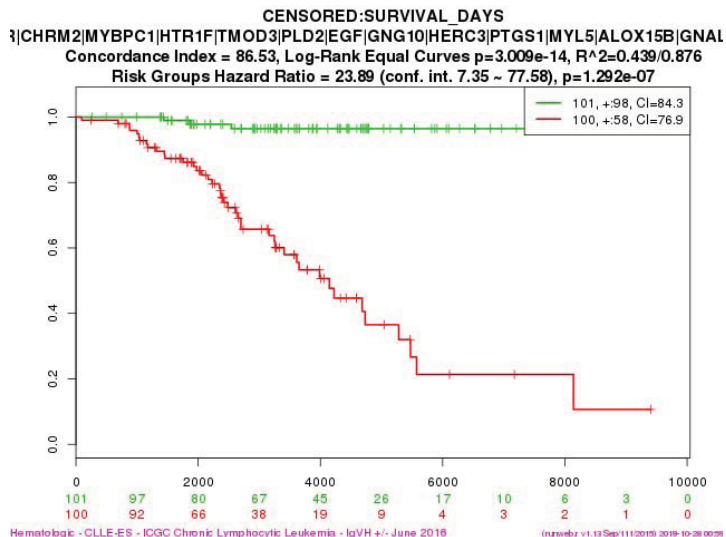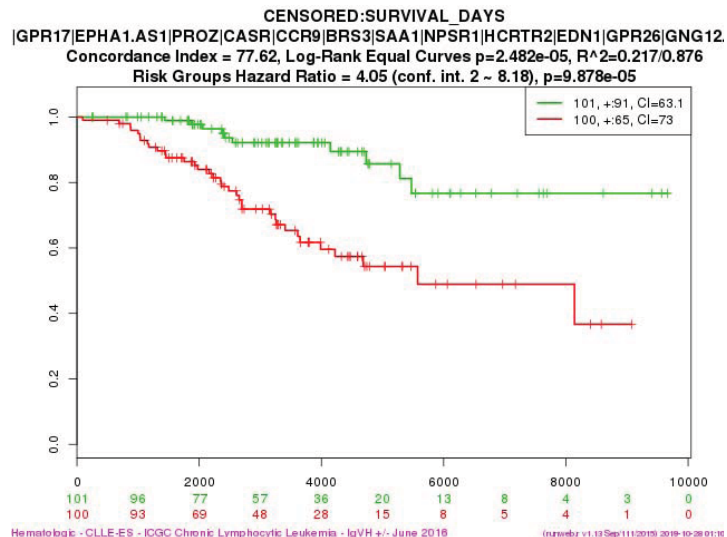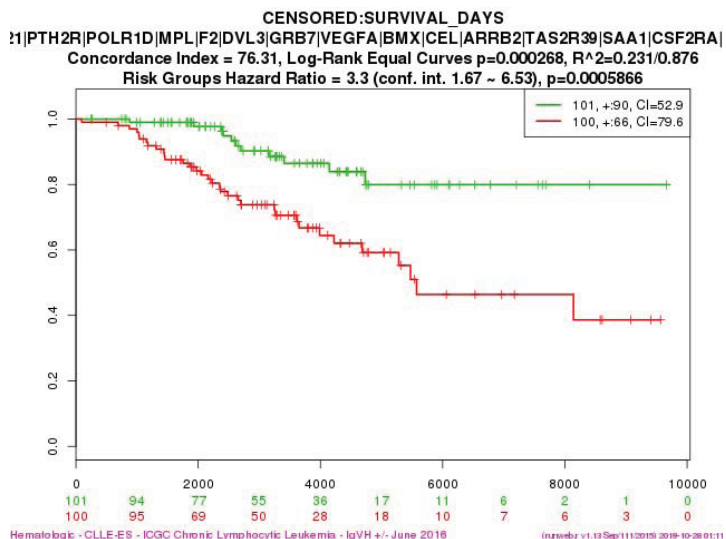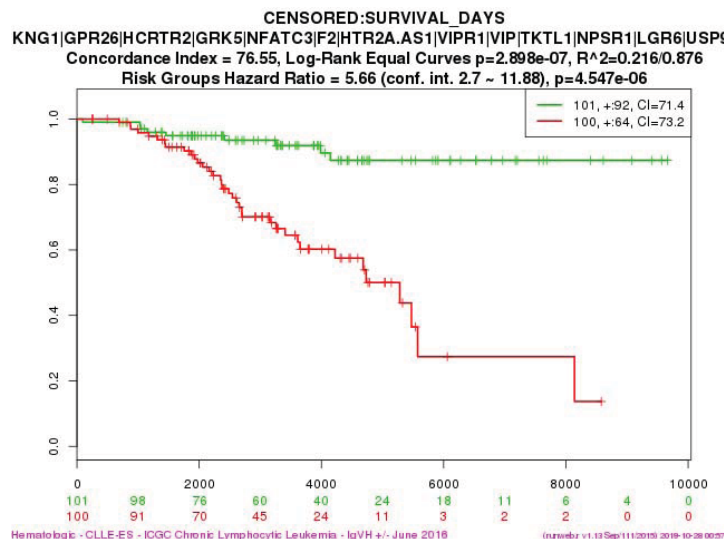



Supplement: Data_Sheet_1.ZIP [file Data_Sheet_1.ZIP]

(A)

Module-1

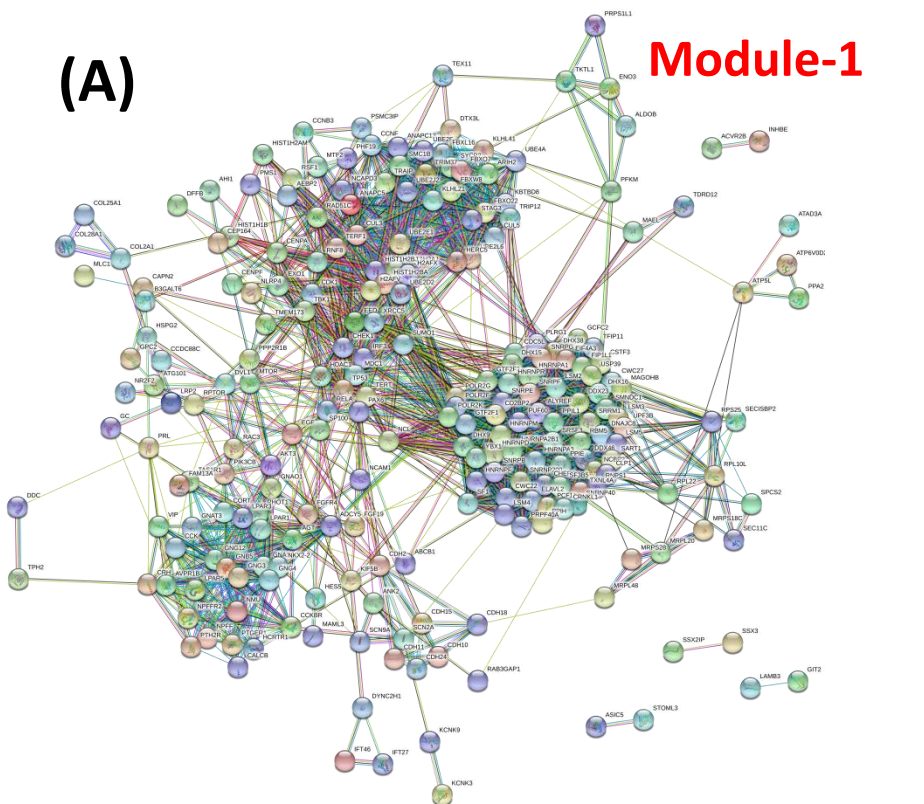

(B)

Module-2

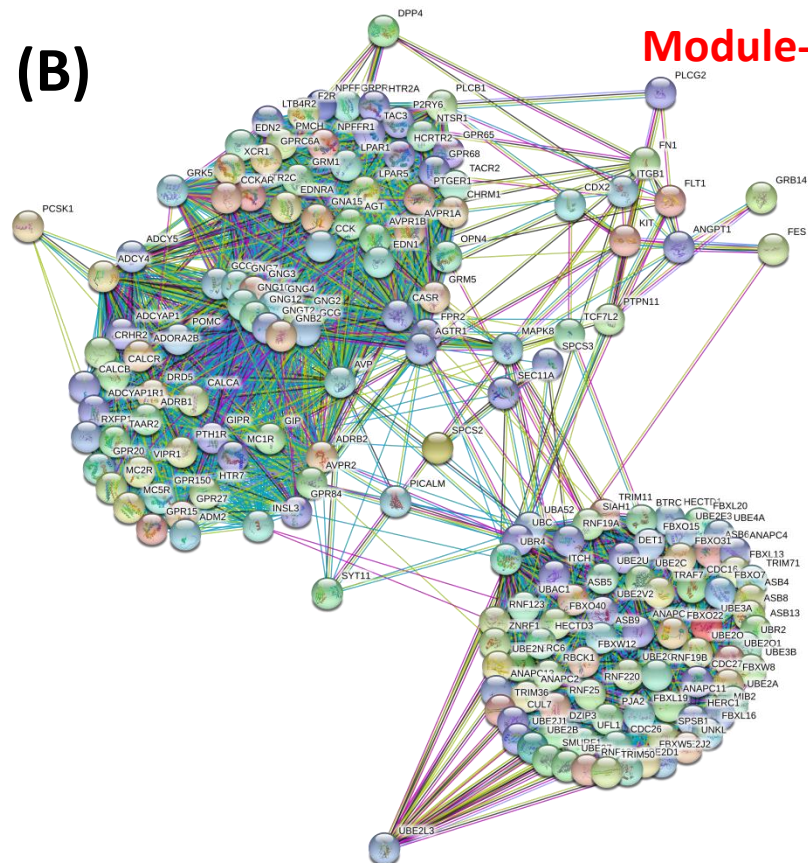

(C)

Module-3

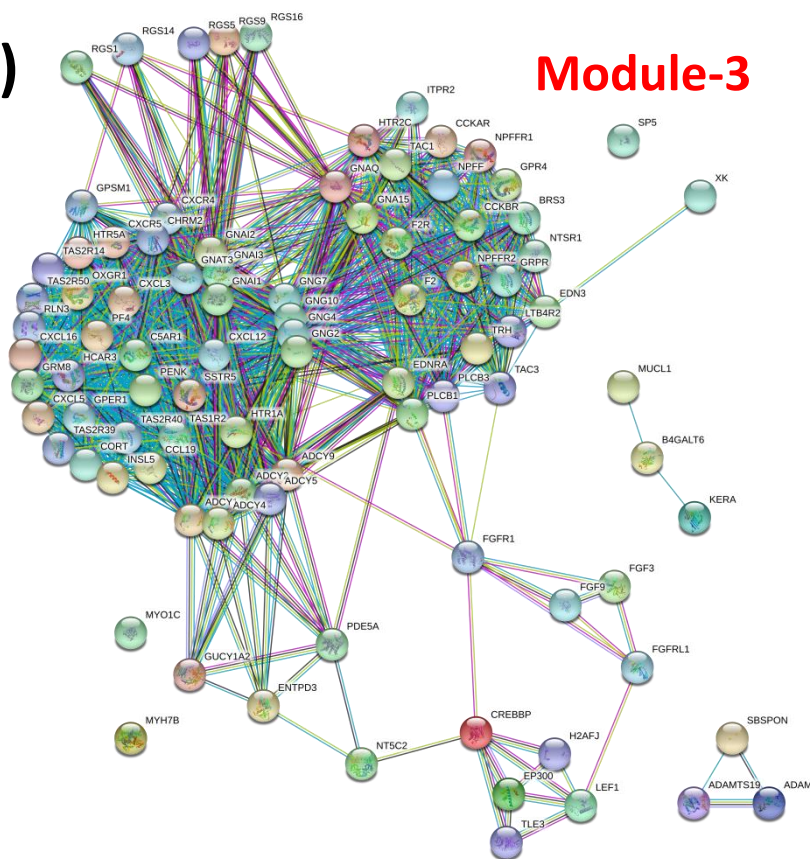

(D)

Module-10

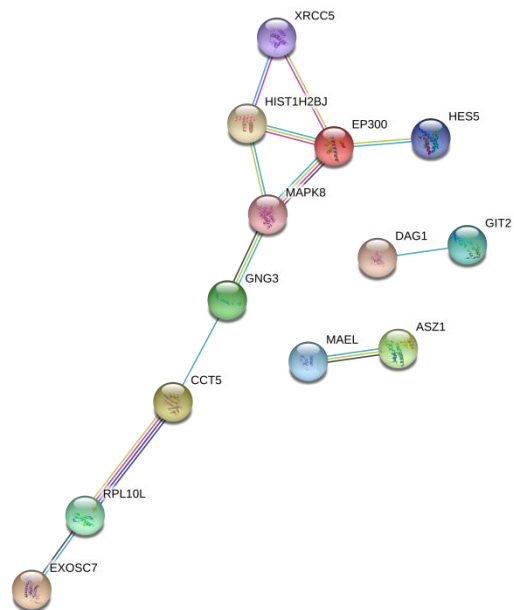

Supplement: Data_Sheet_1.ZIP [file Data_Sheet_1.ZIP]

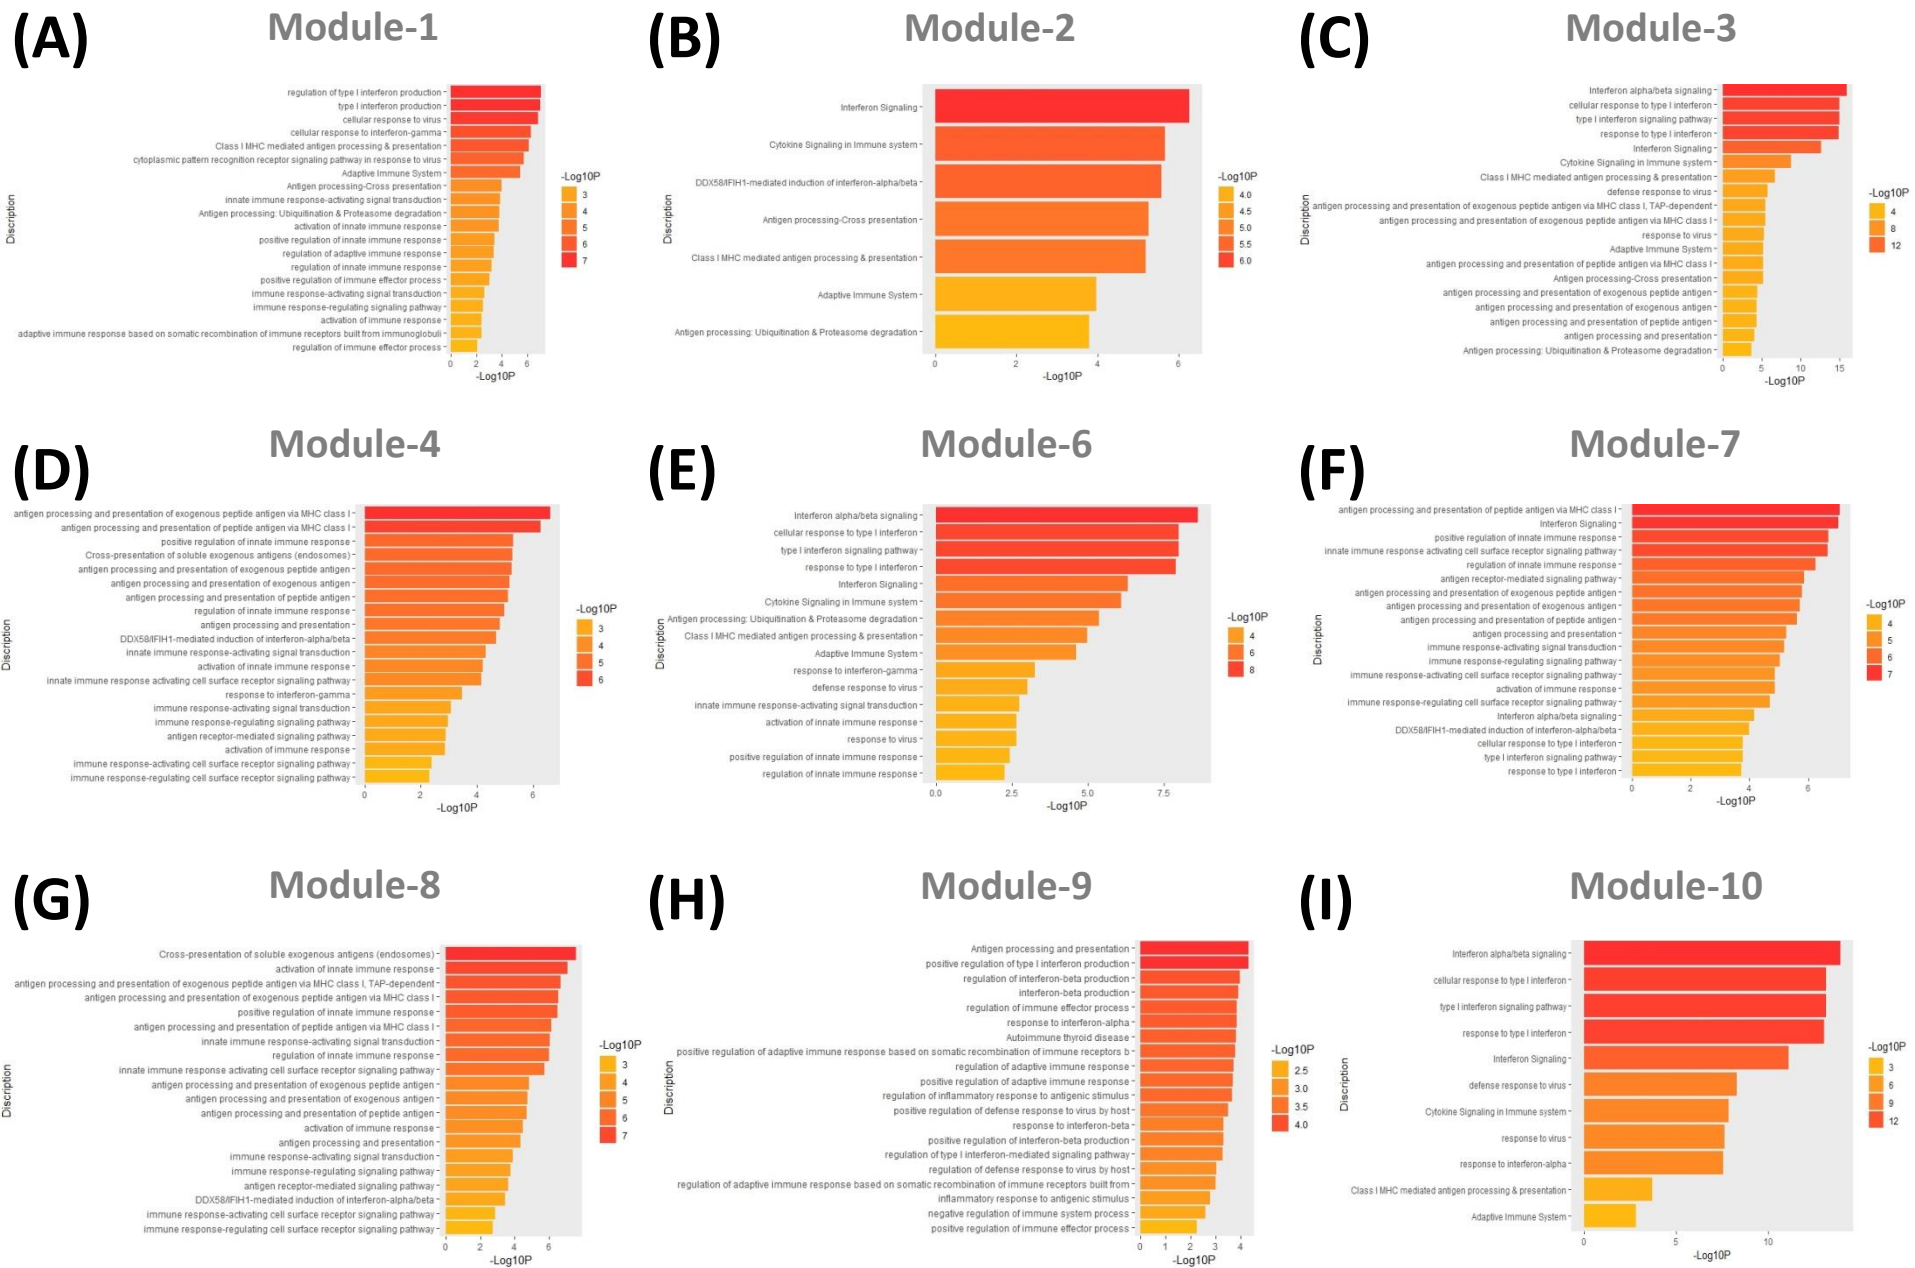

Supplement: Data_Sheet_1.ZIP [file Data_Sheet_1.ZIP]

**(A)****Module-1**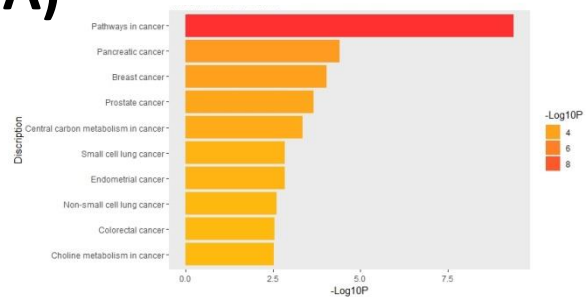**(B)****Module-2**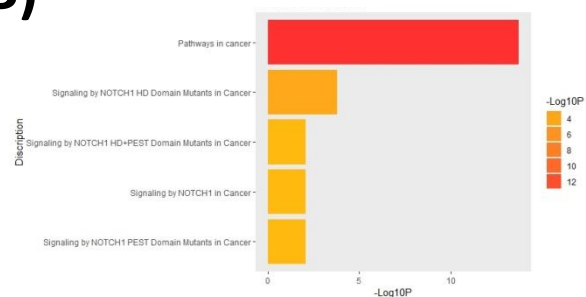**(C)****Module-3**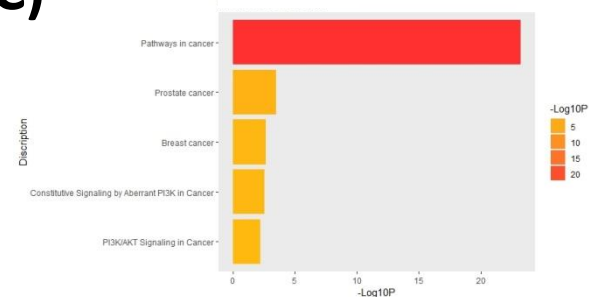**(D)****Module-4**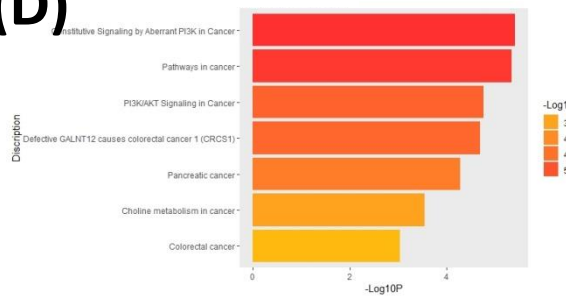**(E)****Module-5**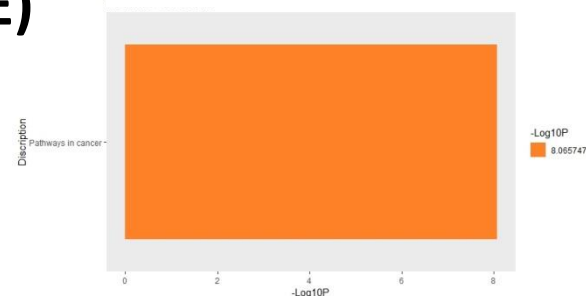**(F)****Module-7**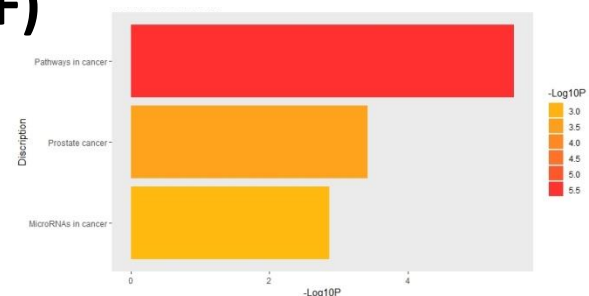**(G)****Module-8**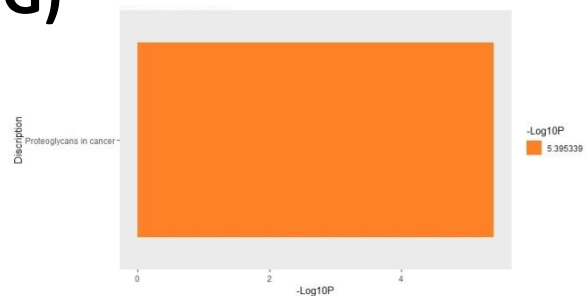**(H)****Module-9**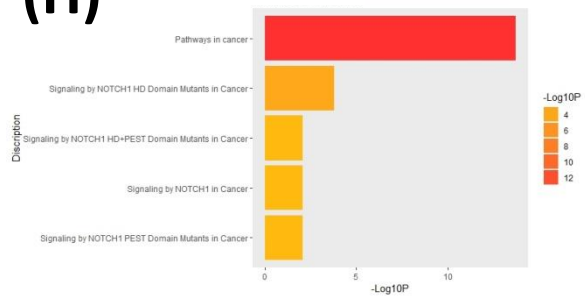**(I)****Module-10**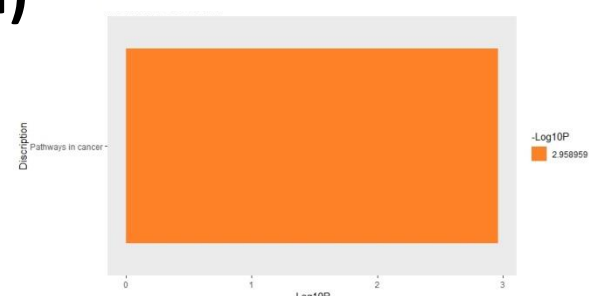

Supplement: Data_Sheet_1.ZIP [file Data_Sheet_1.ZIP]

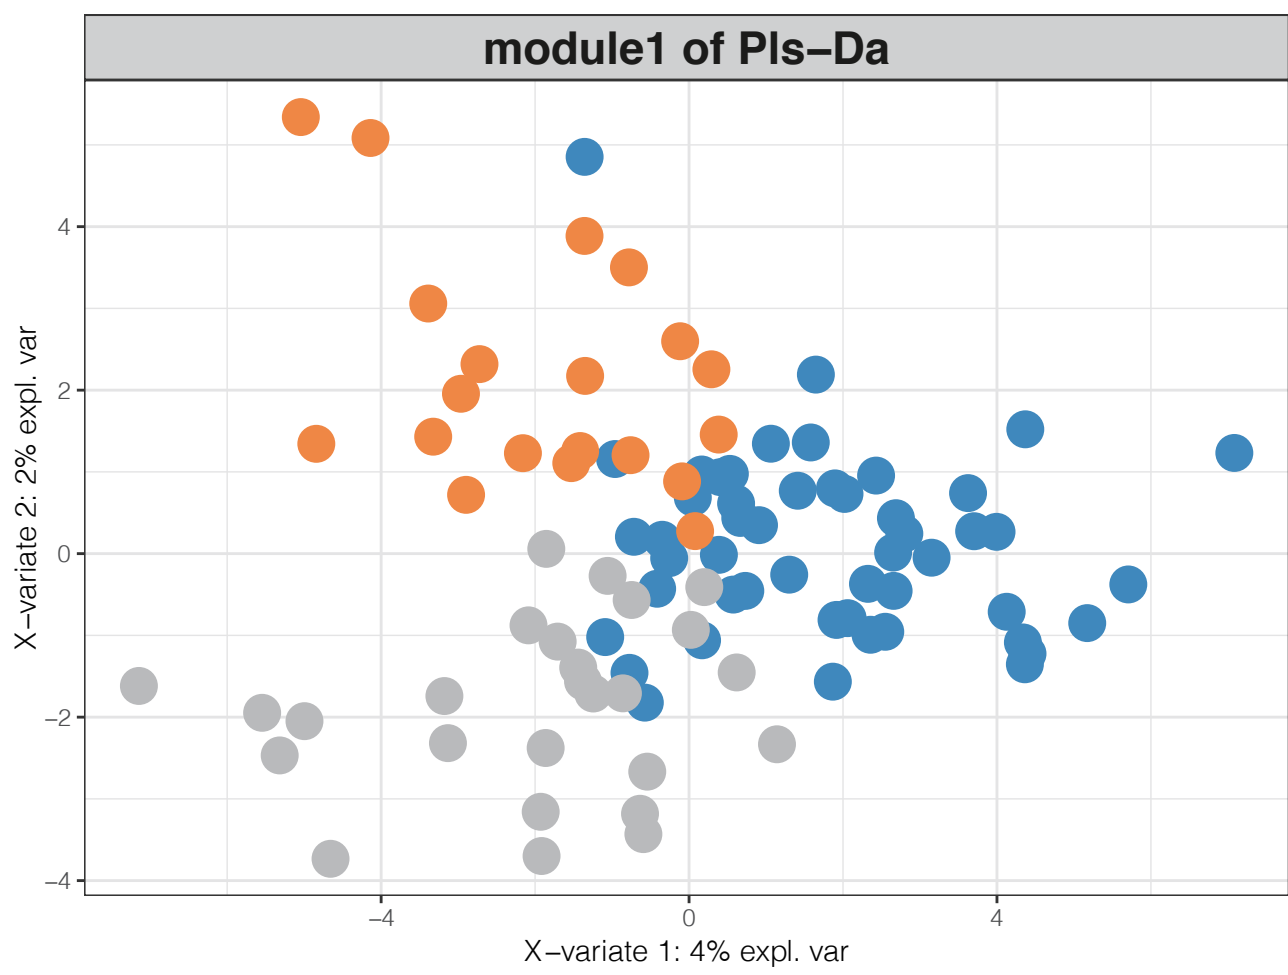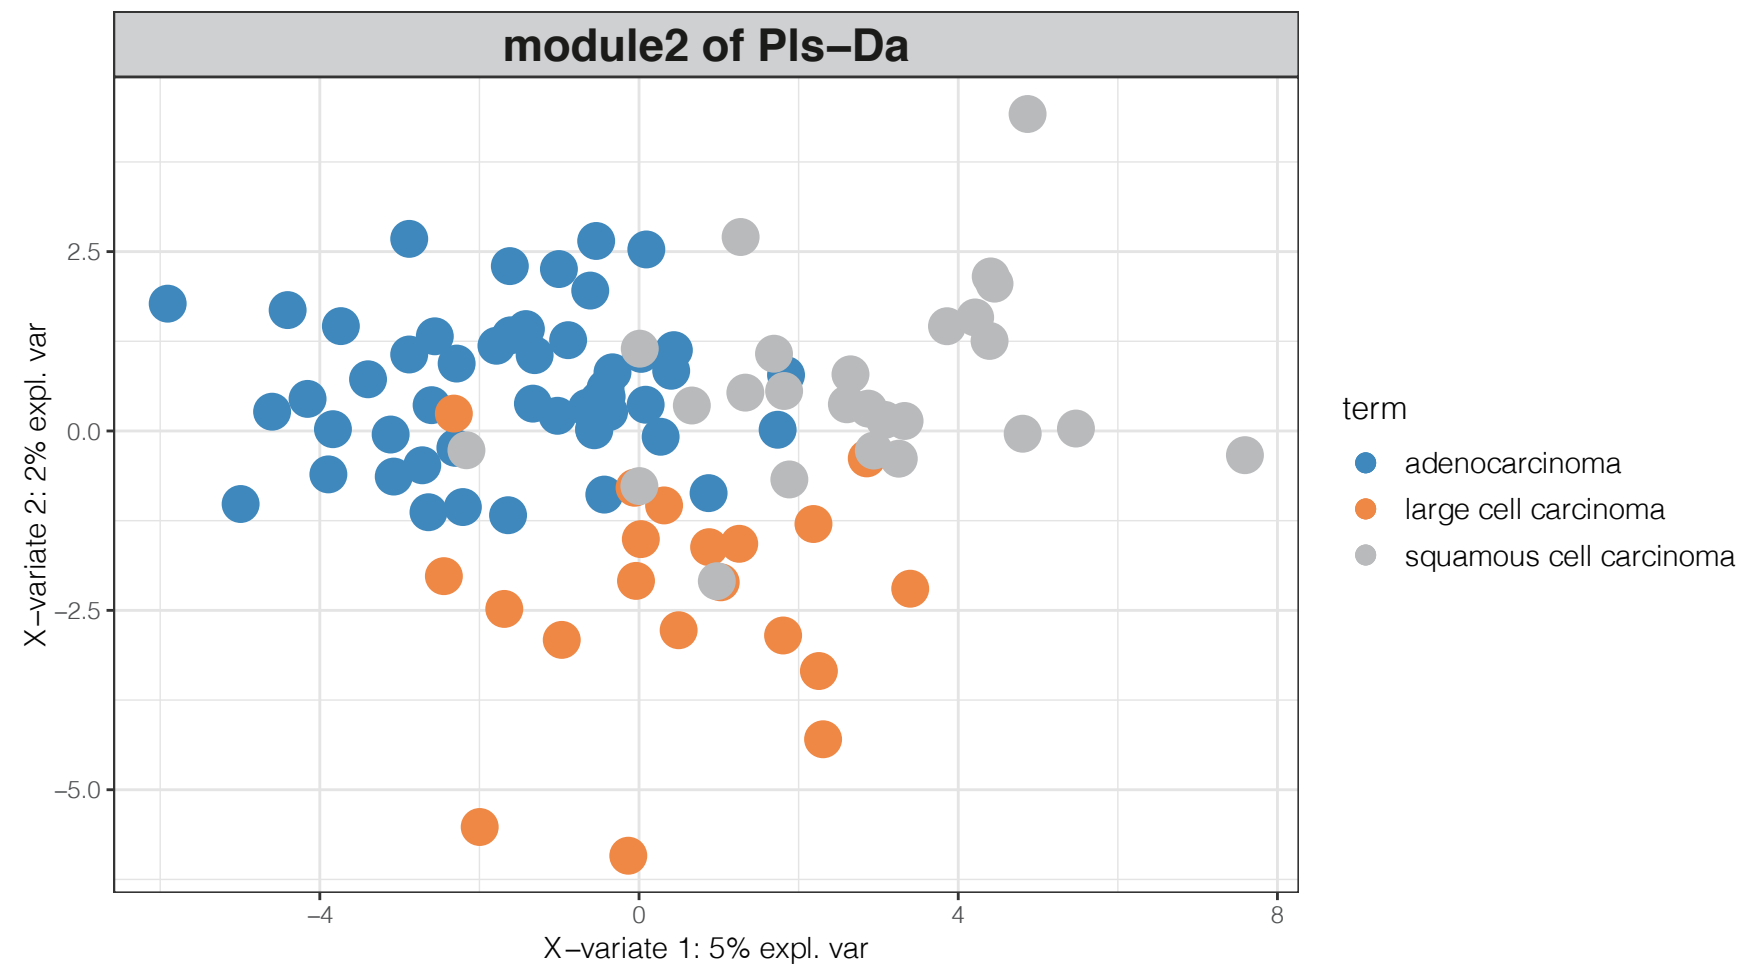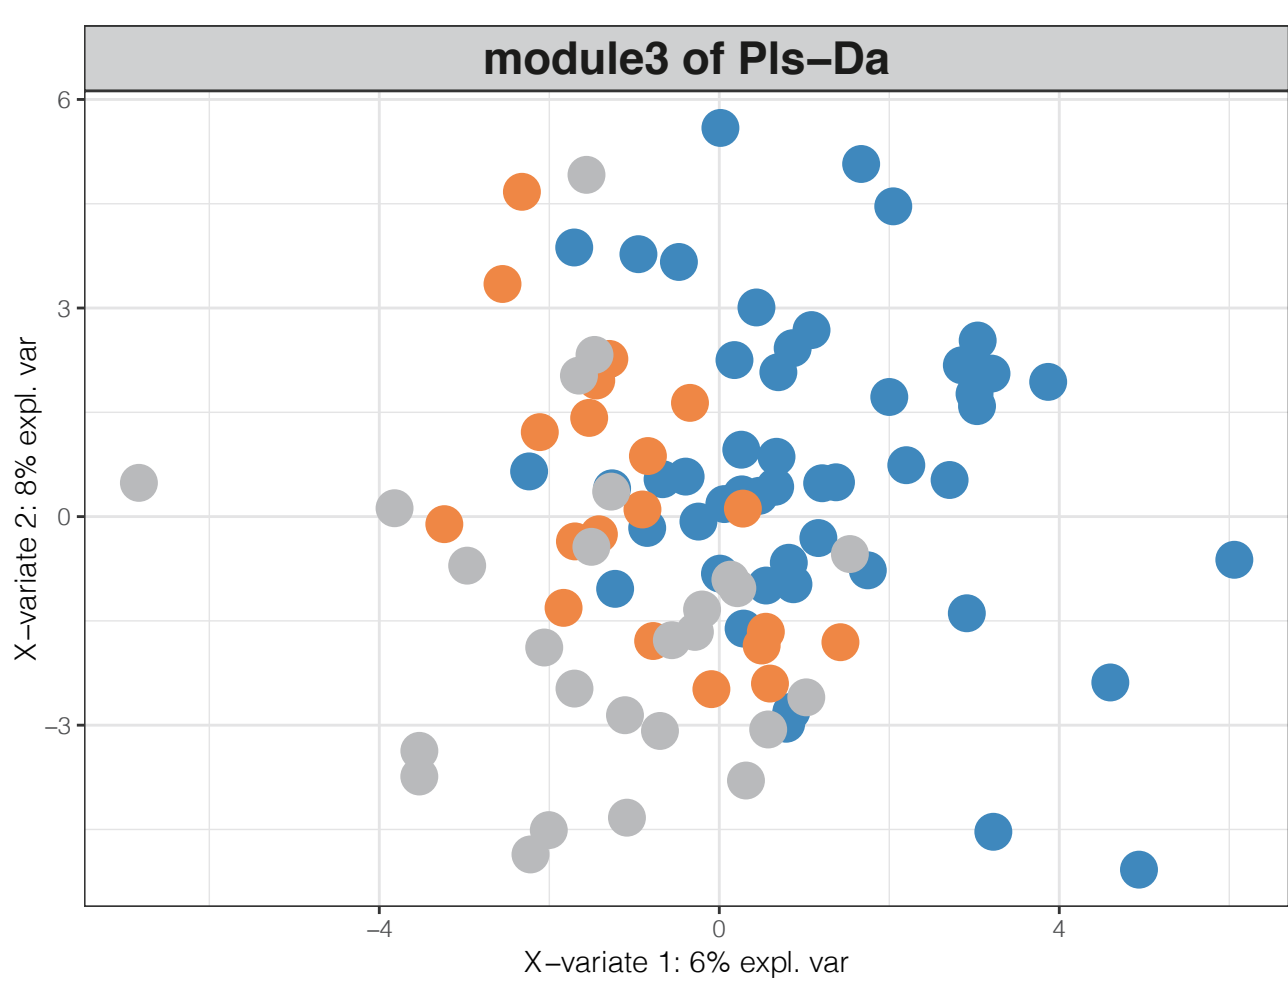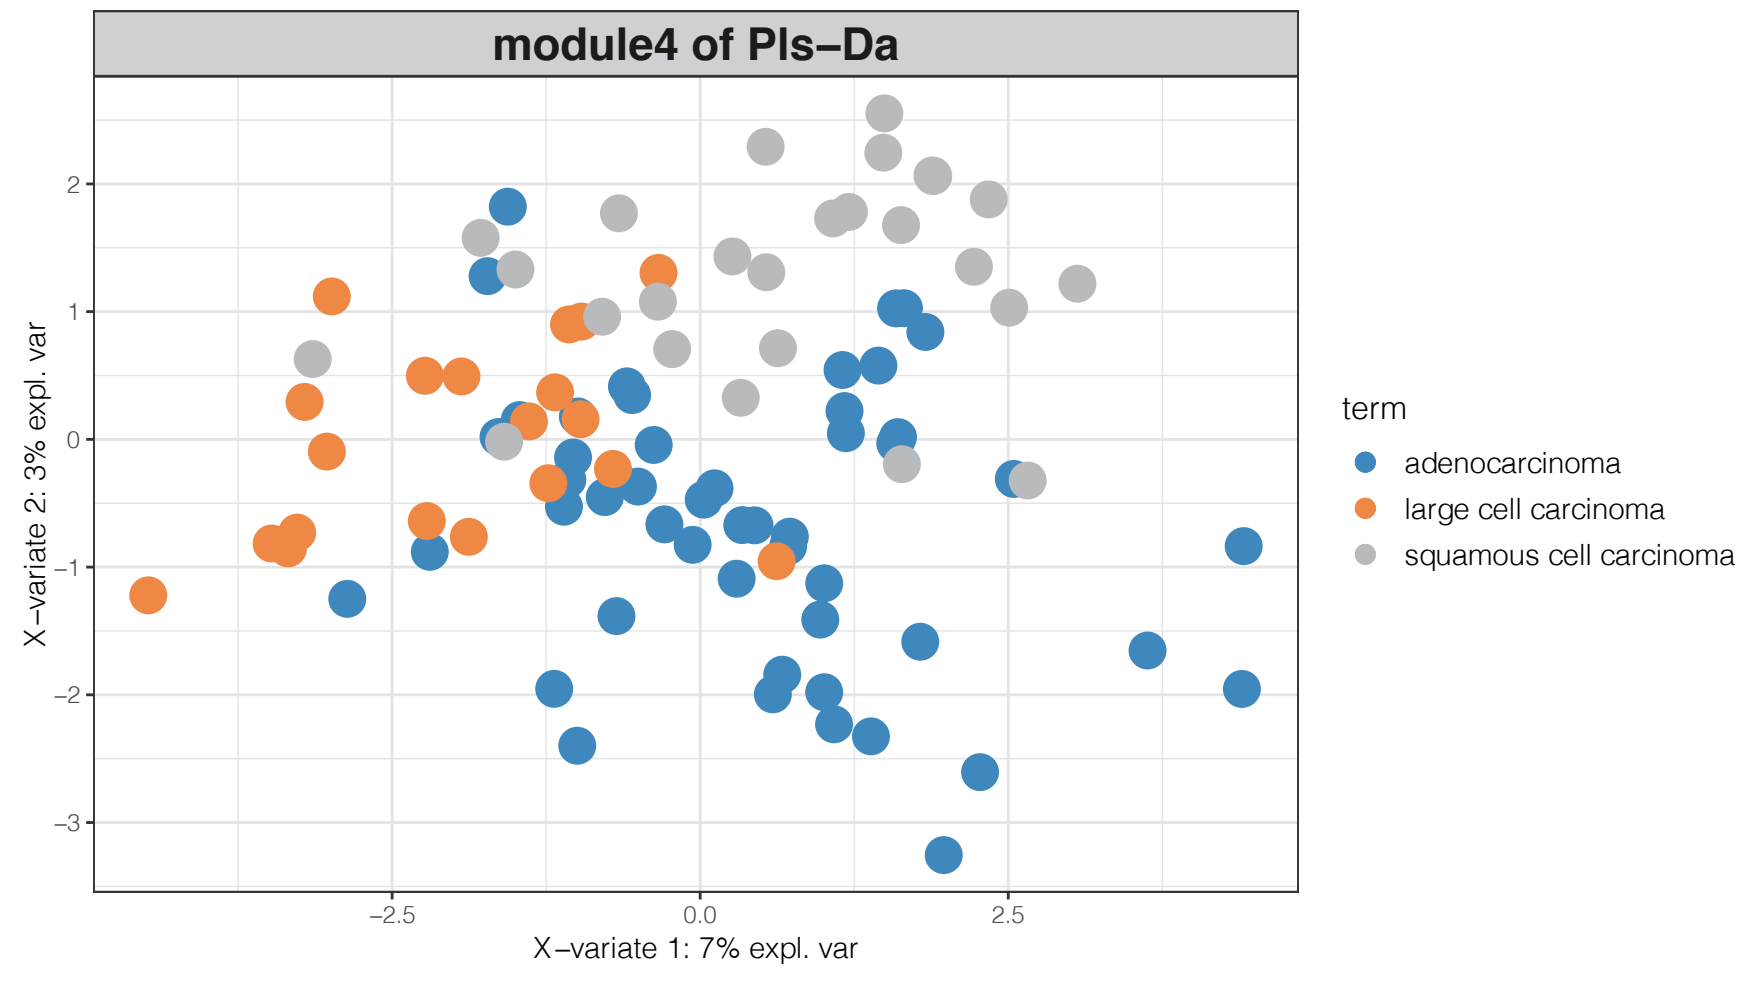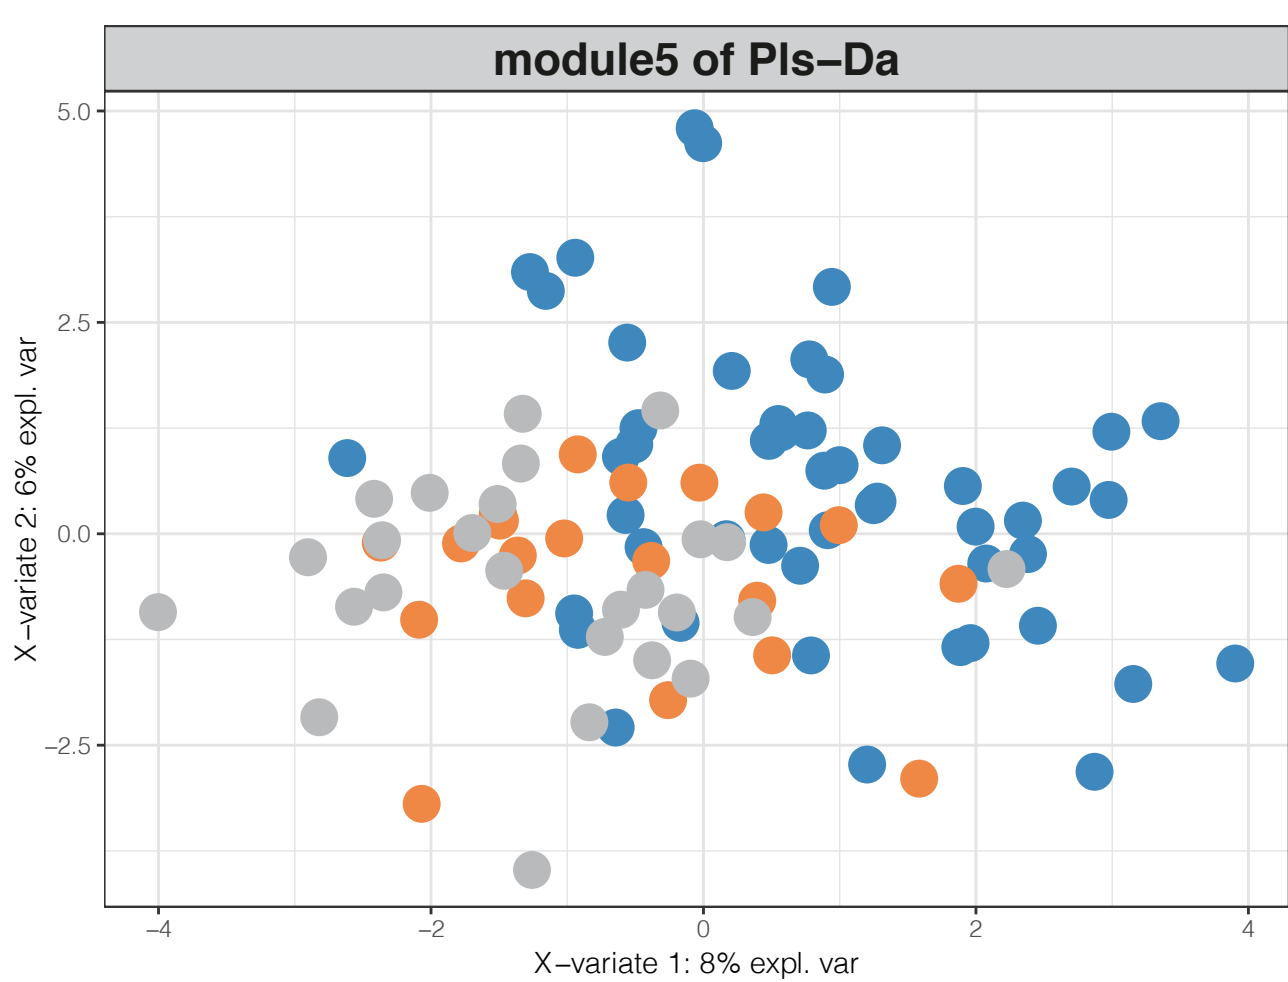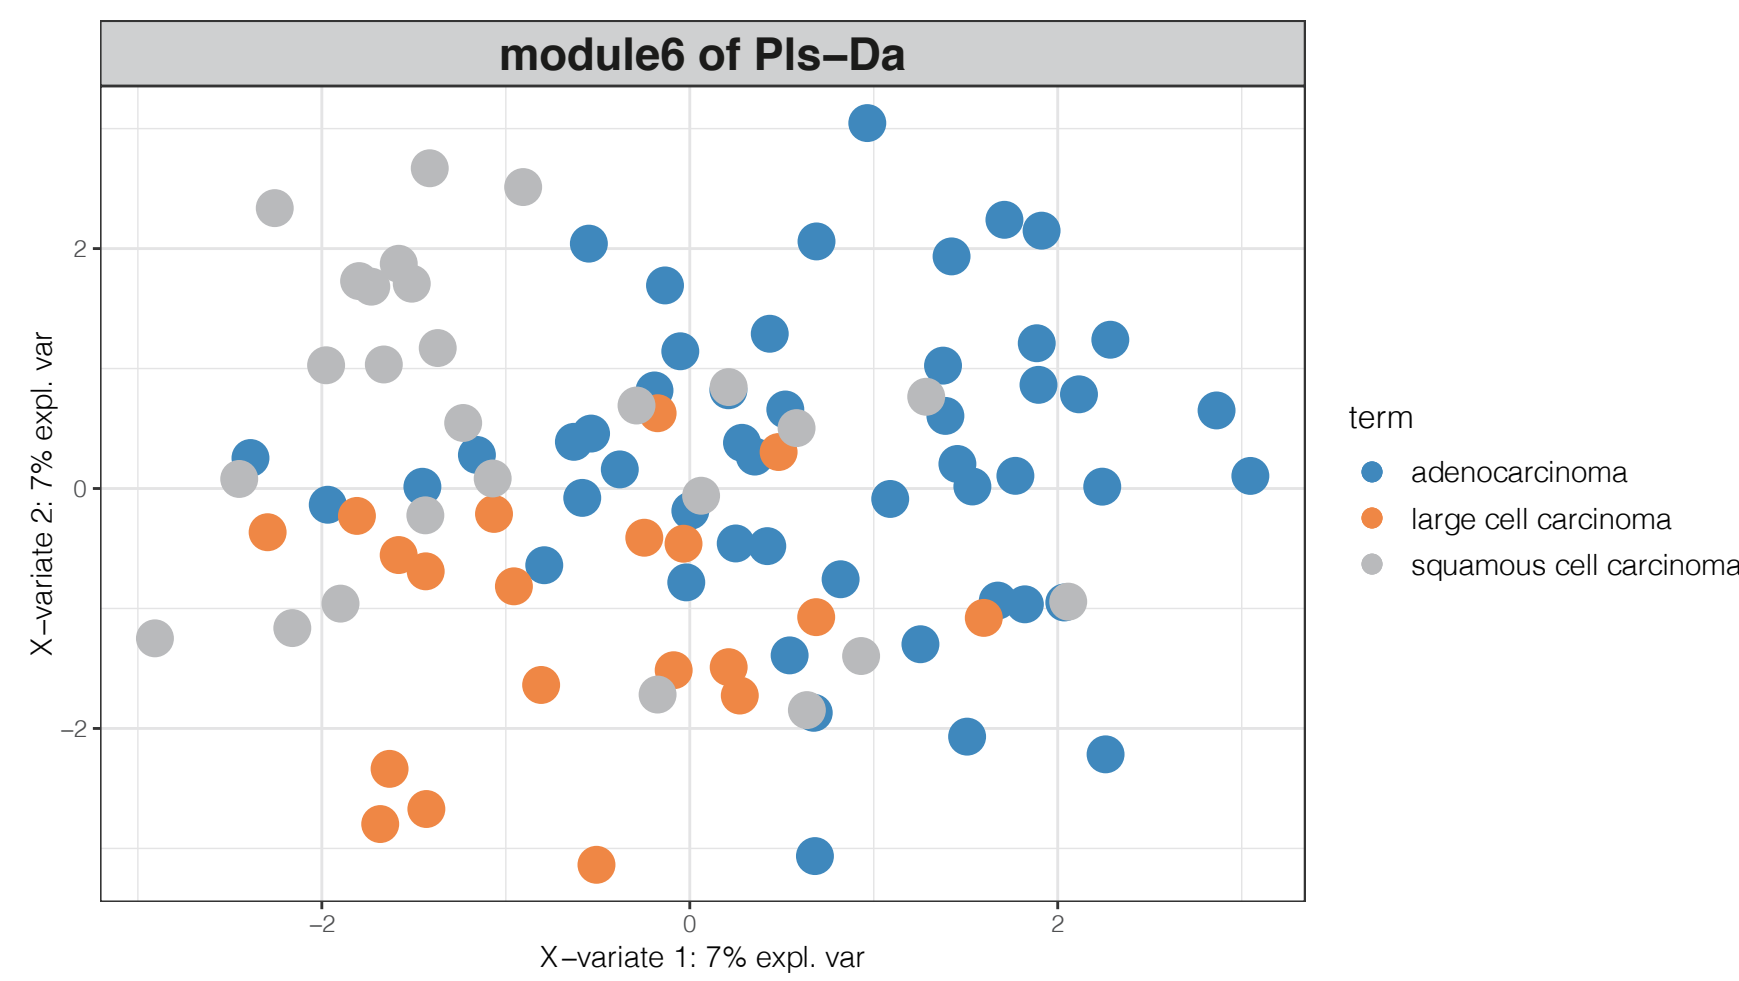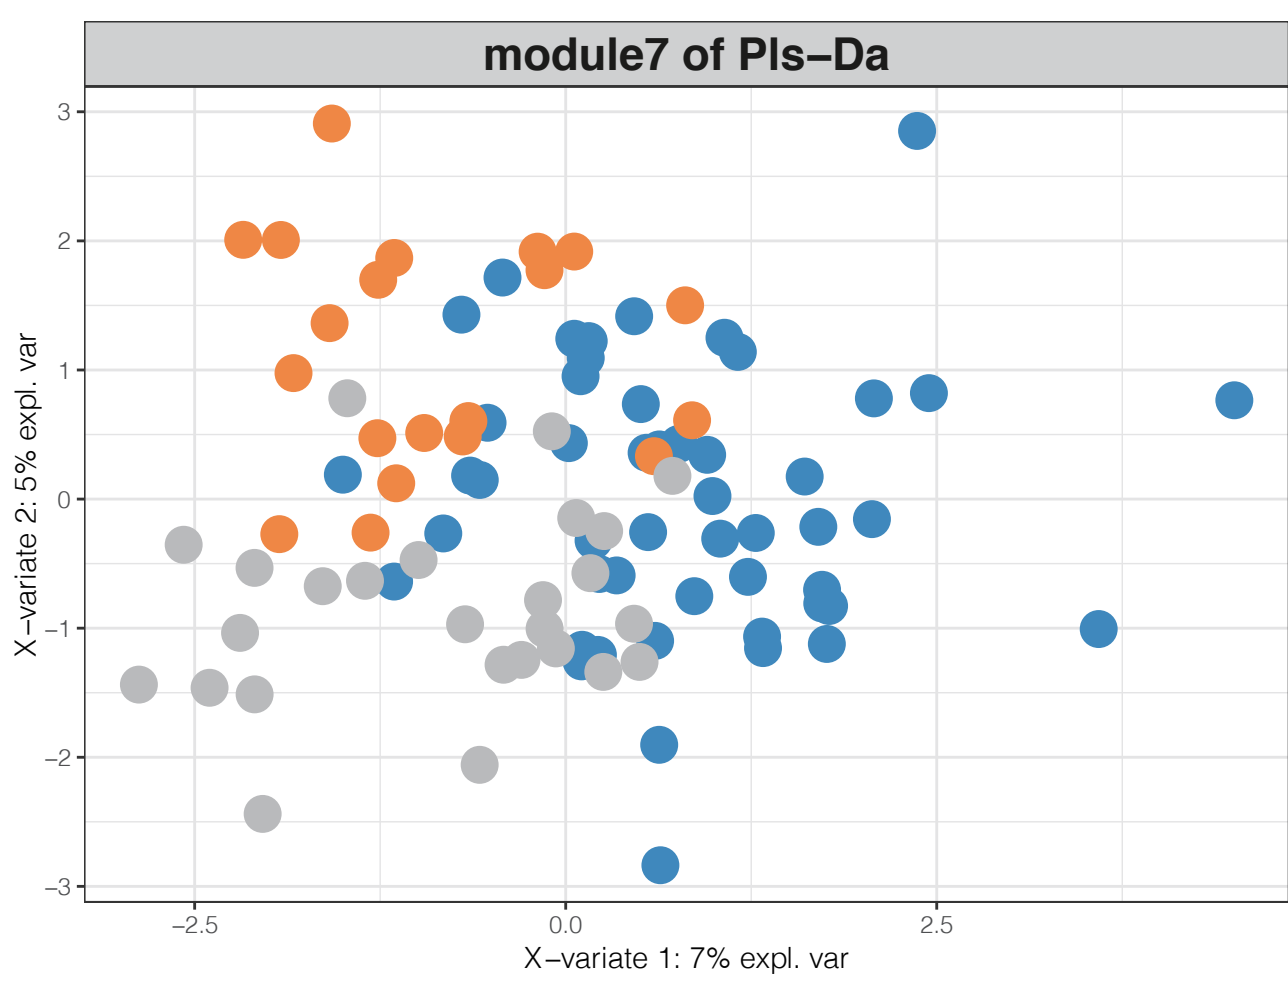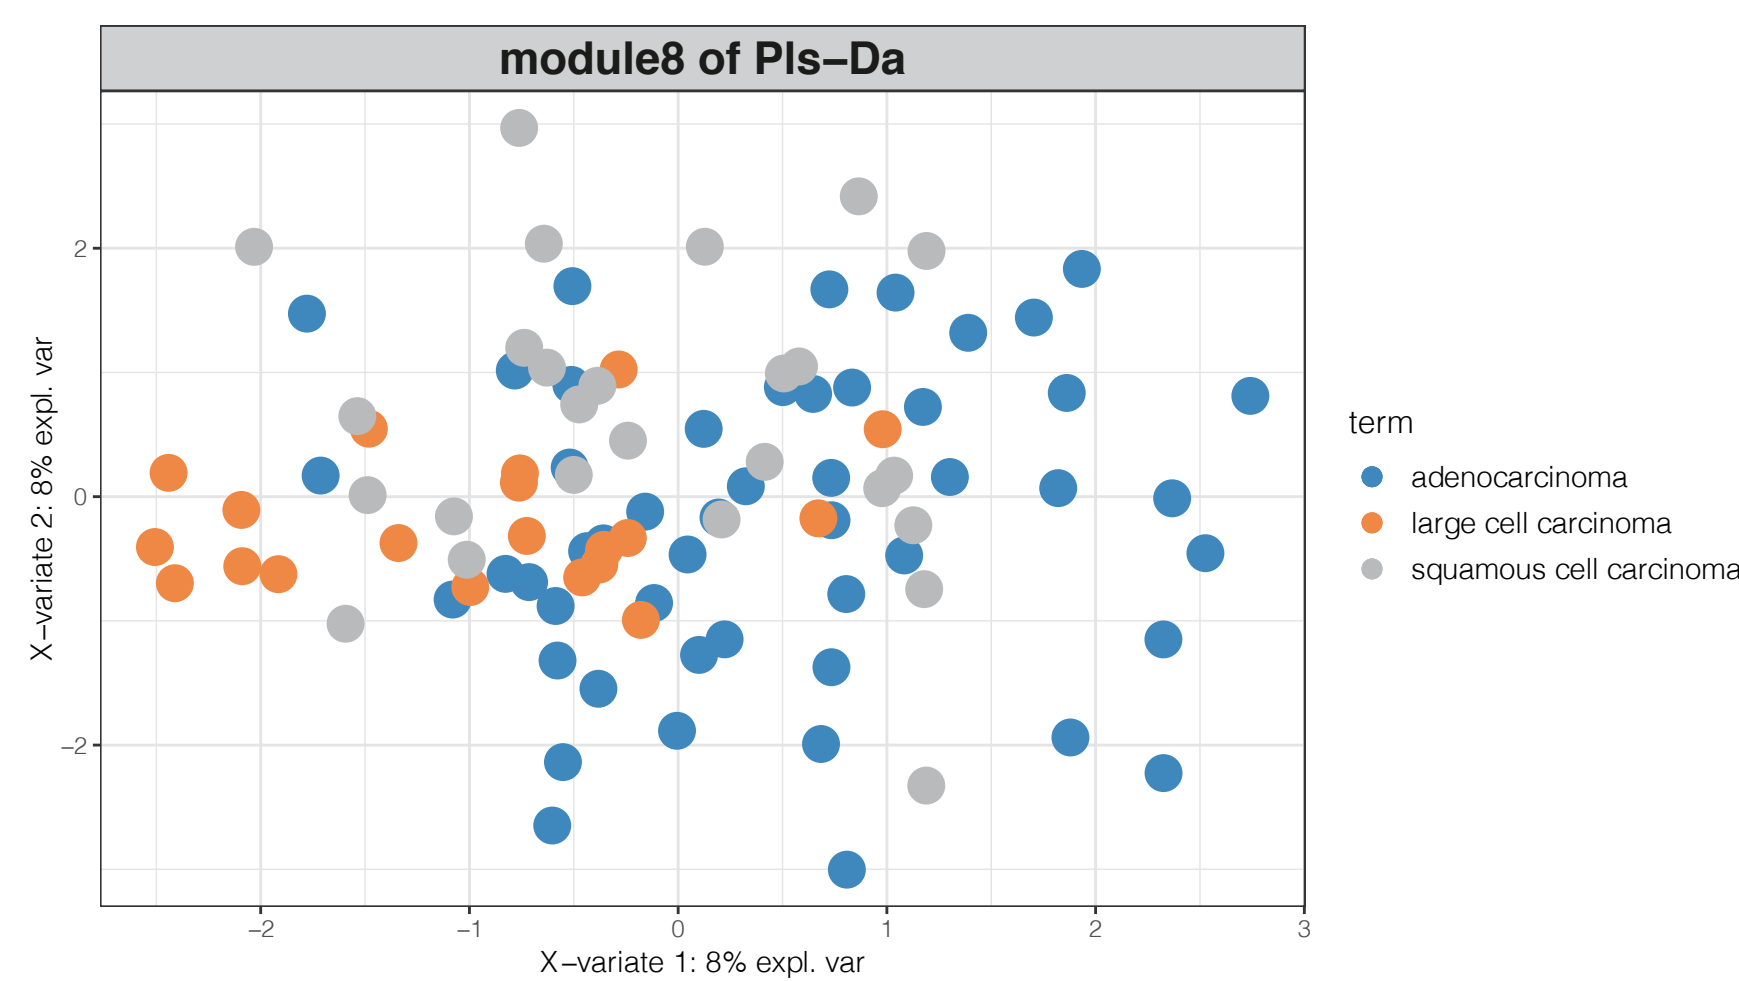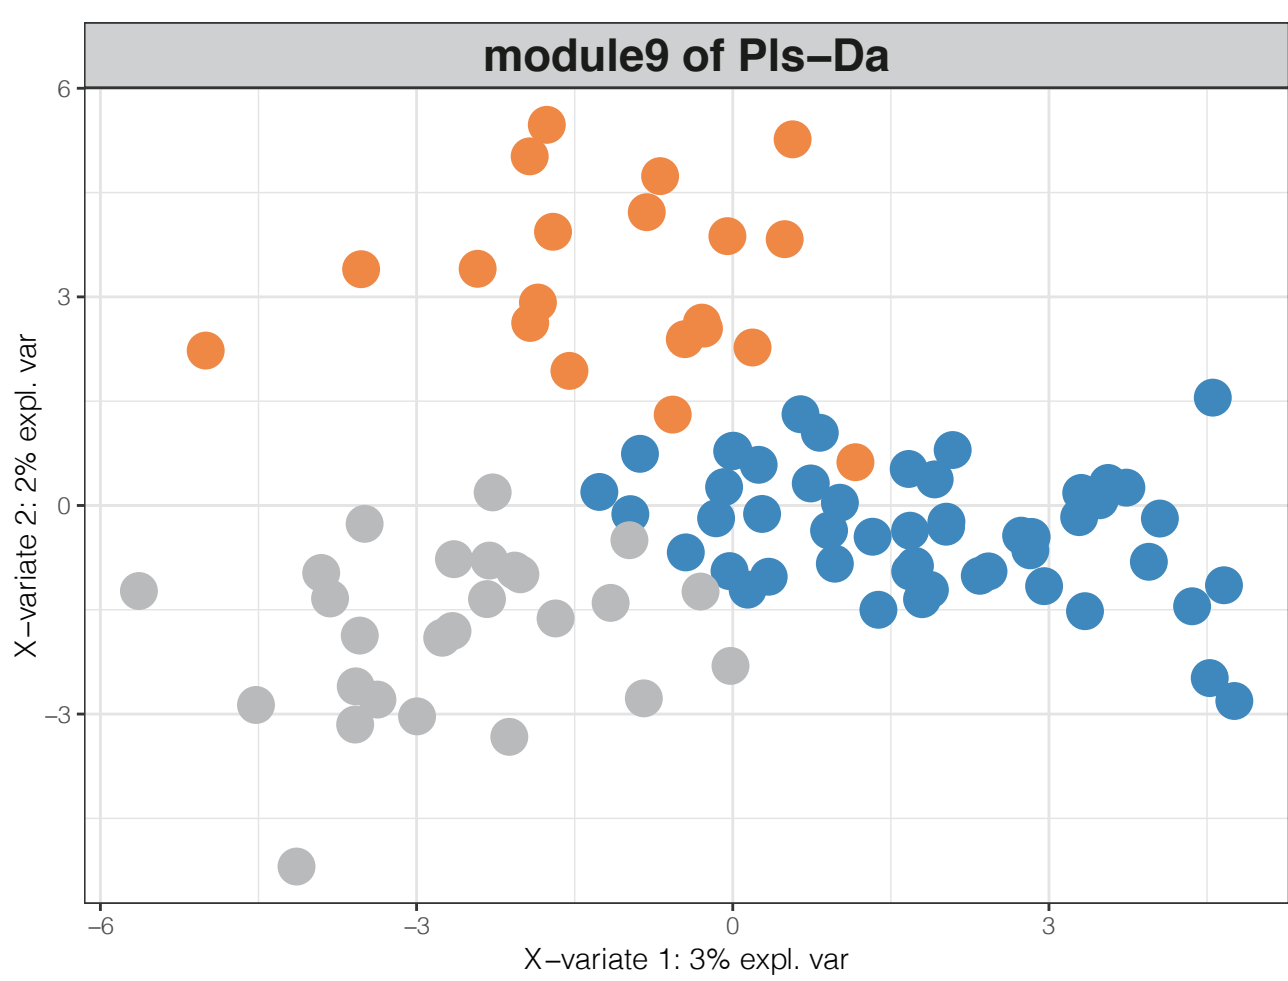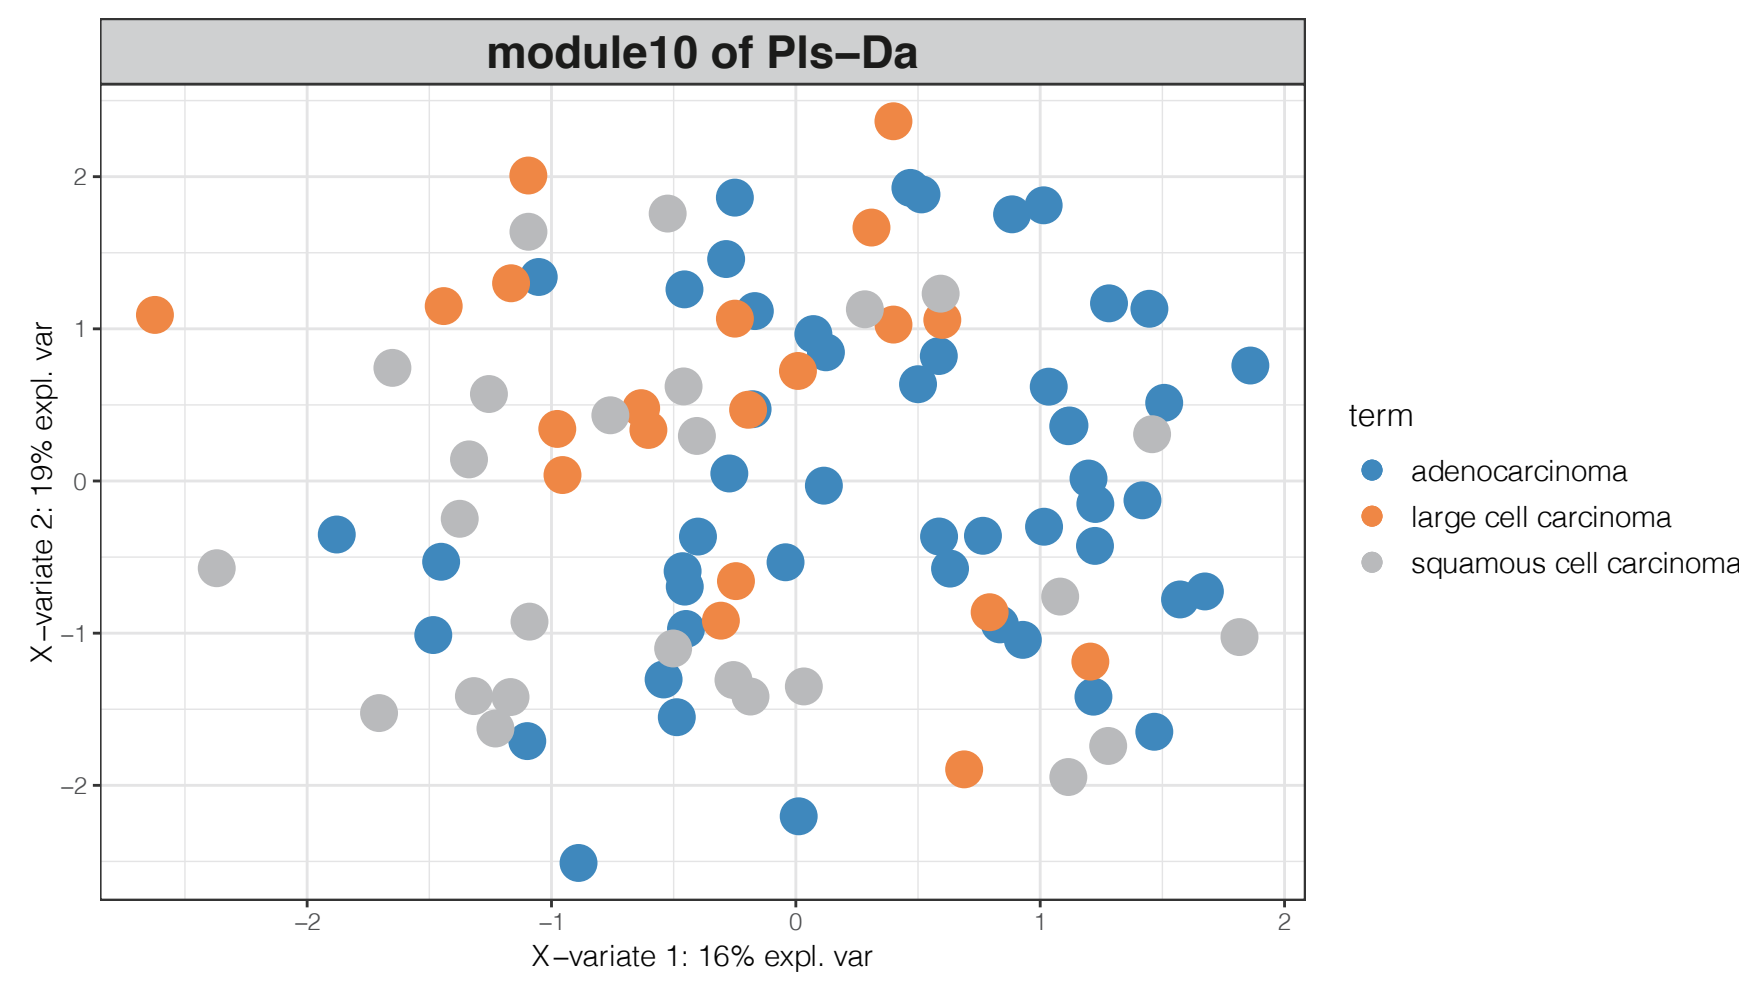

Supplement: Data_Sheet_1.ZIP [file Data_Sheet_1.ZIP]

**(A)****eQTL QQ-plot on GSE28571**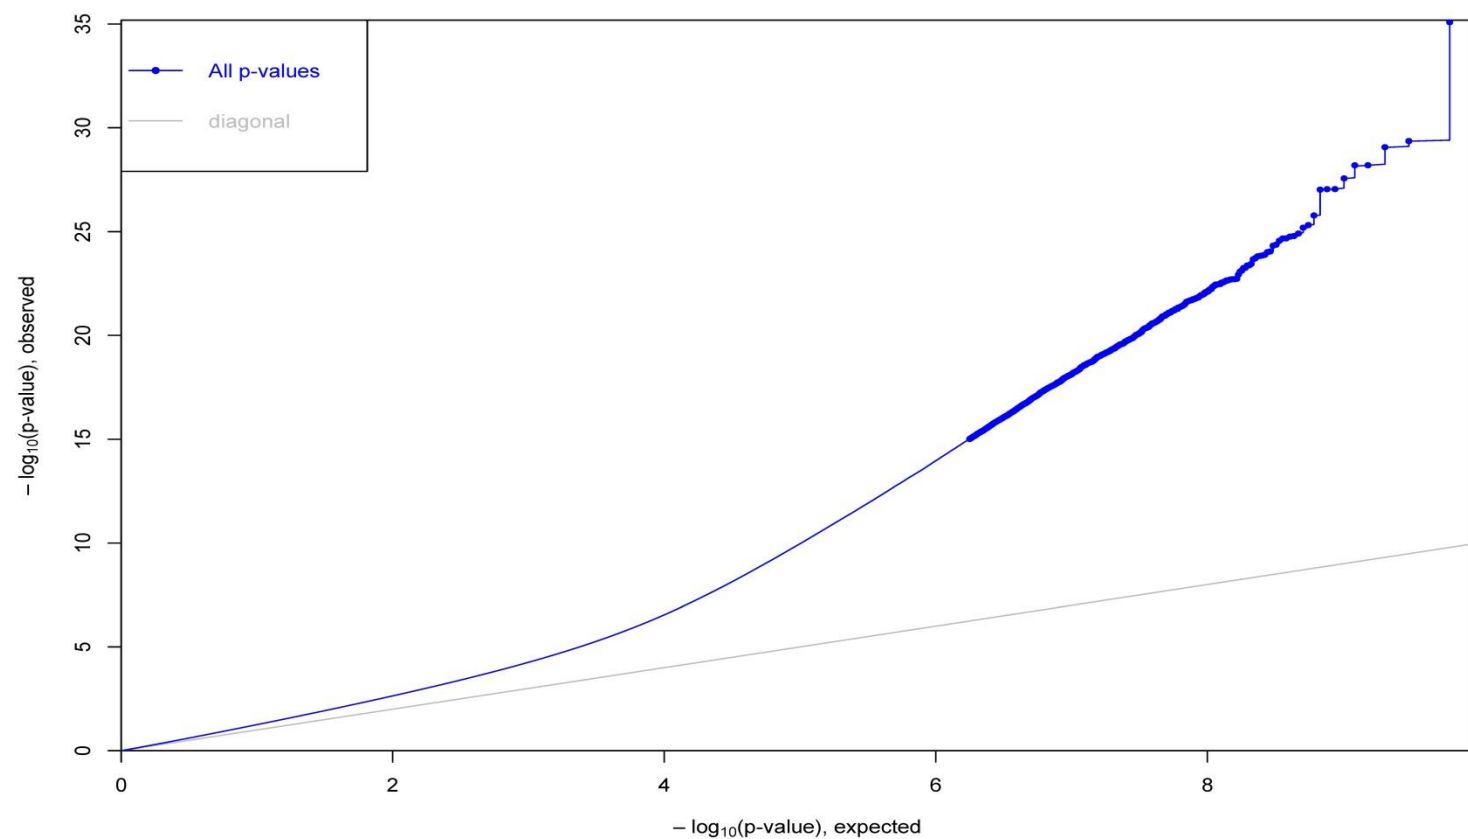**(B)****nQTL QQ-plot on GSE28571**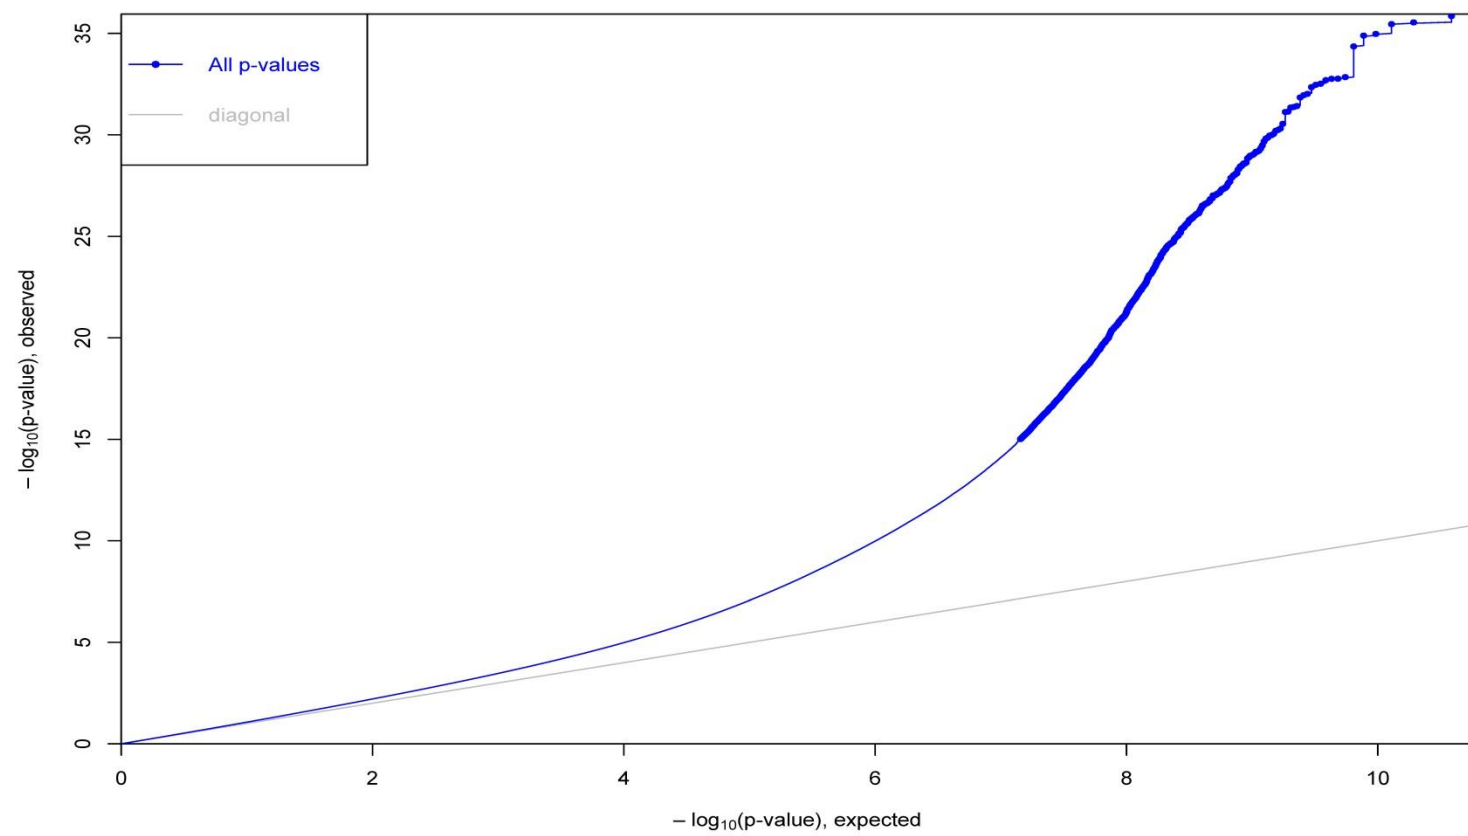

Supplement: Data_Sheet_1.ZIP [file Data_Sheet_1.ZIP]

(A)

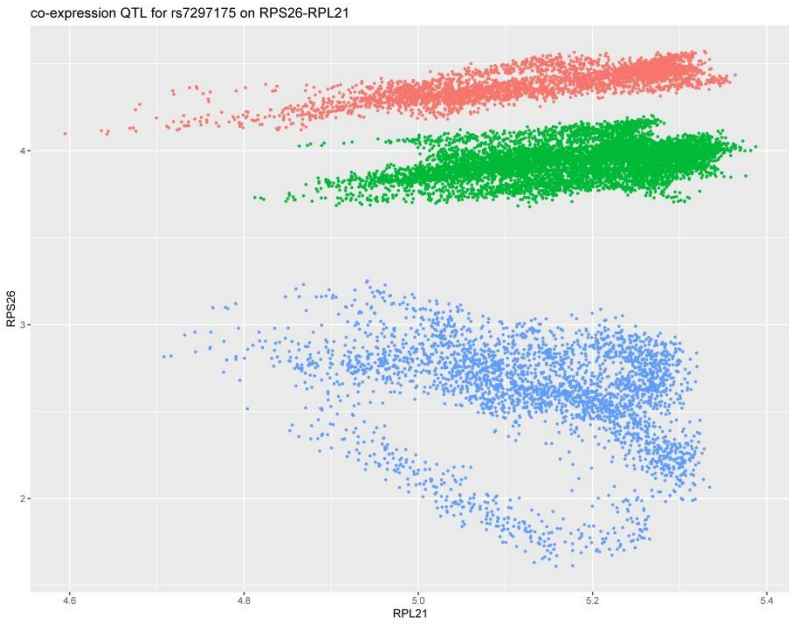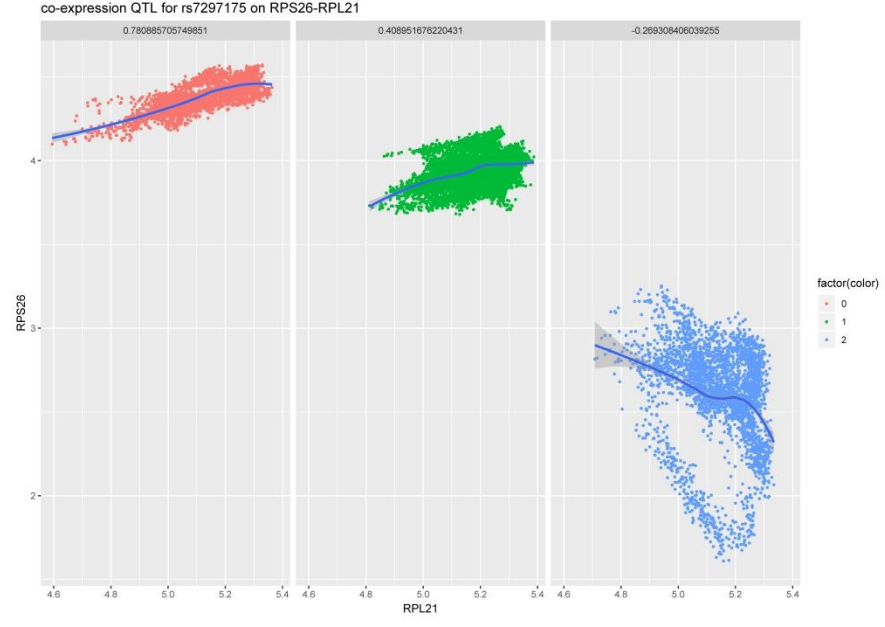

(B)

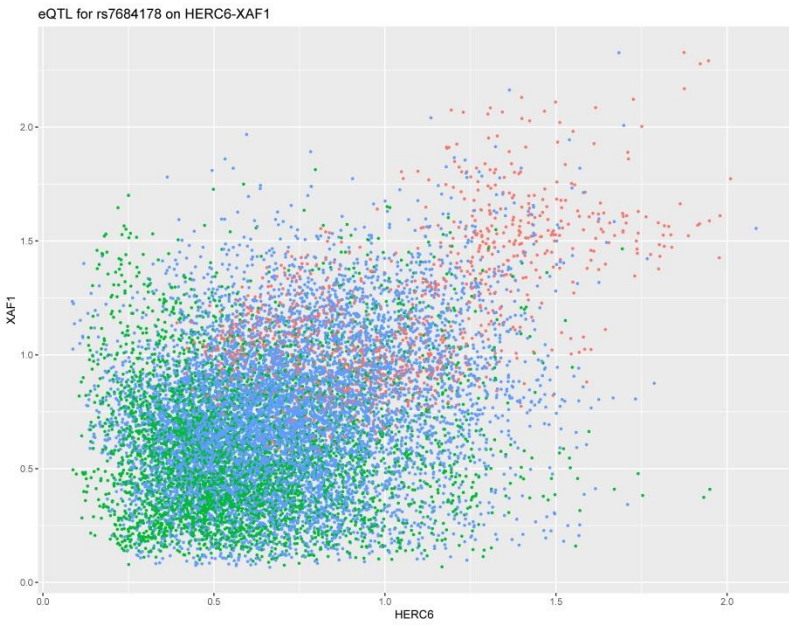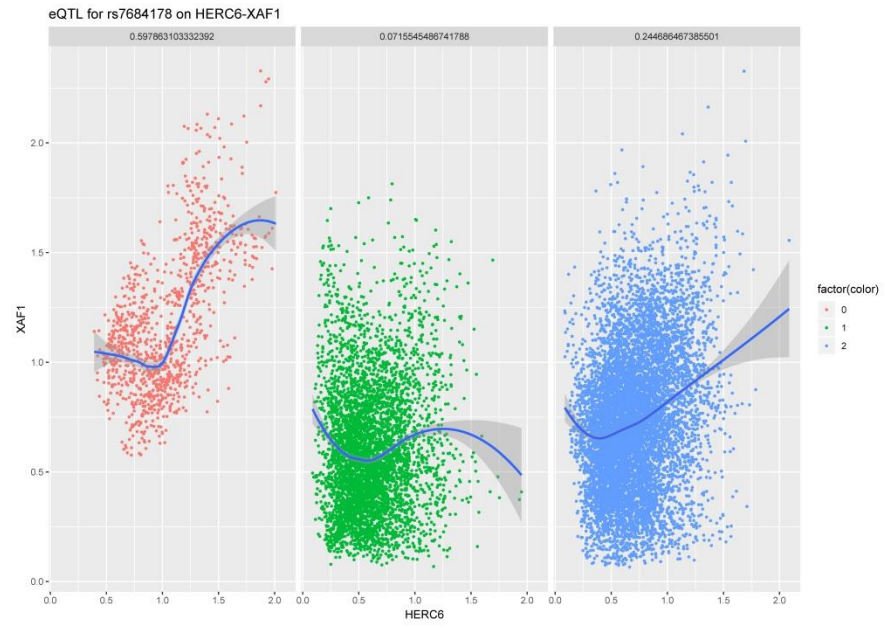

Supplement: Data_Sheet_1.ZIP [file Data_Sheet_1.ZIP]

**(A)****eQTL QQ-plot on scRNA-seq induced data**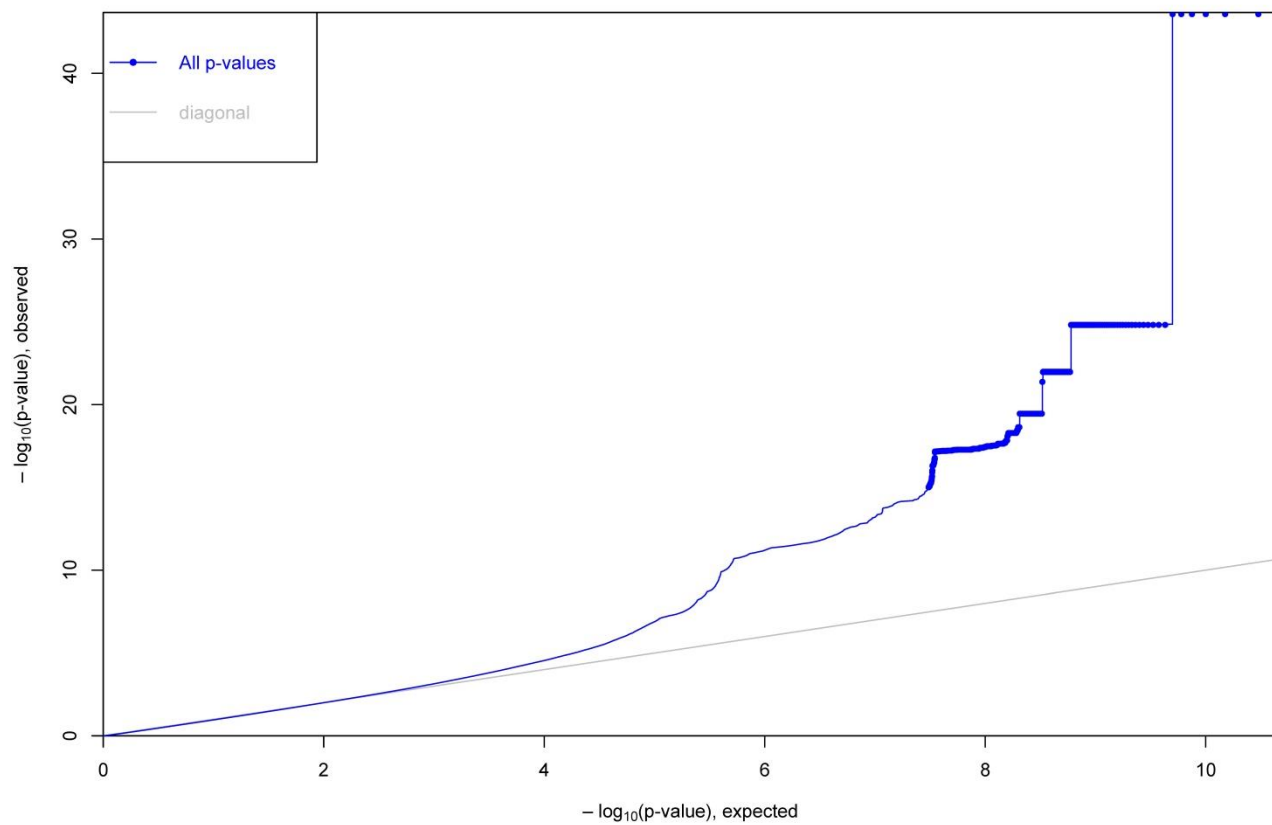**(B)****nQTL QQ-plot on scRNA-seq induced data**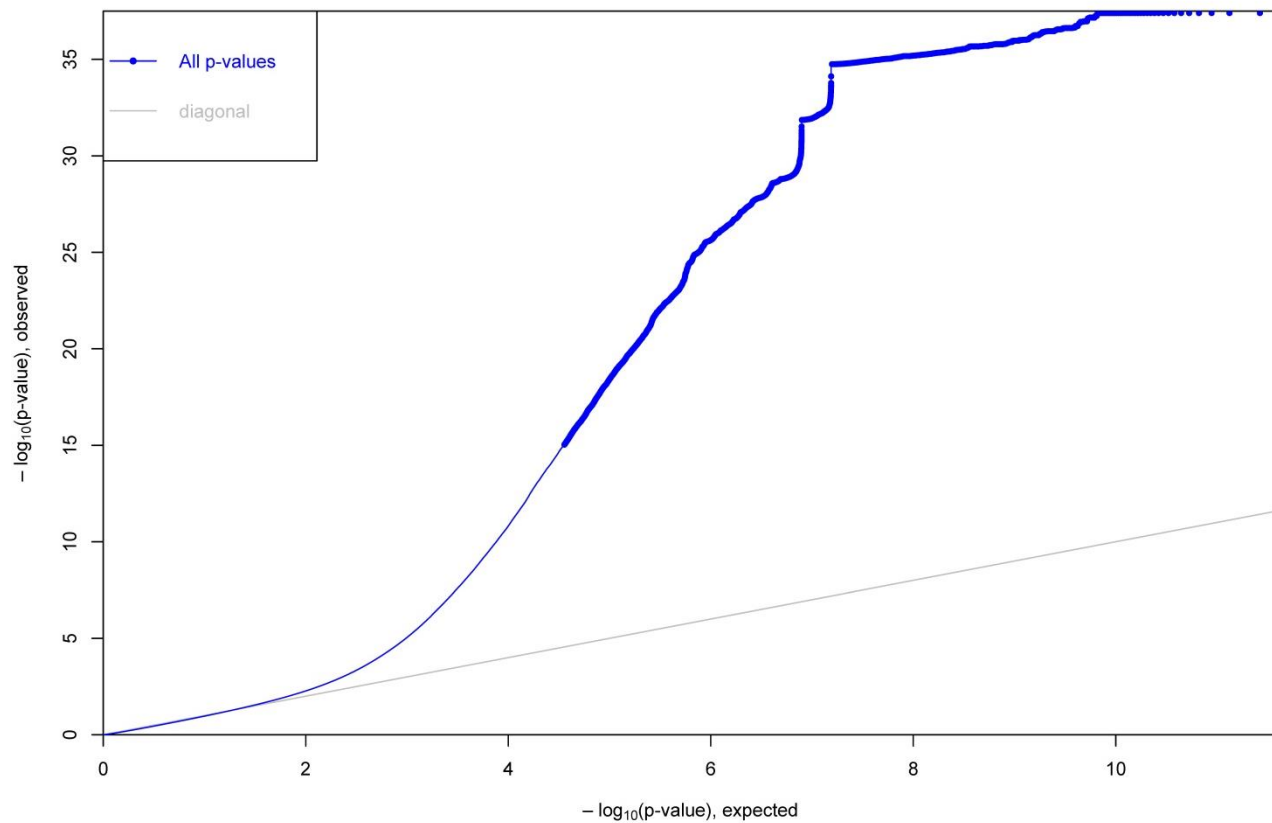

Supplement: Data_Sheet_1.ZIP [file Data_Sheet_1.ZIP]

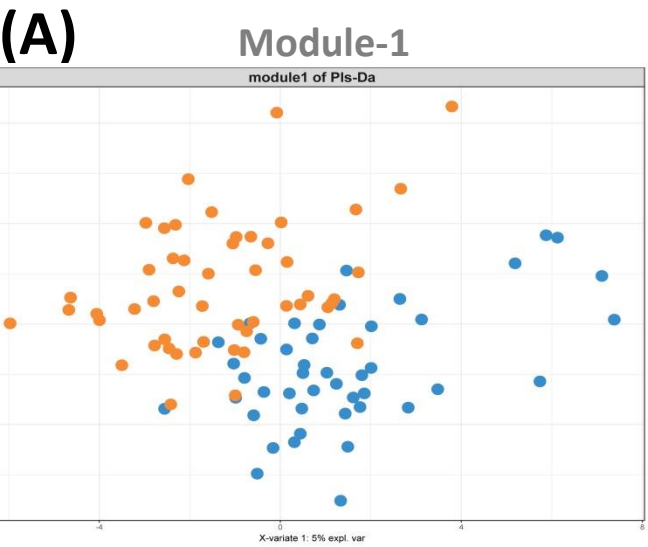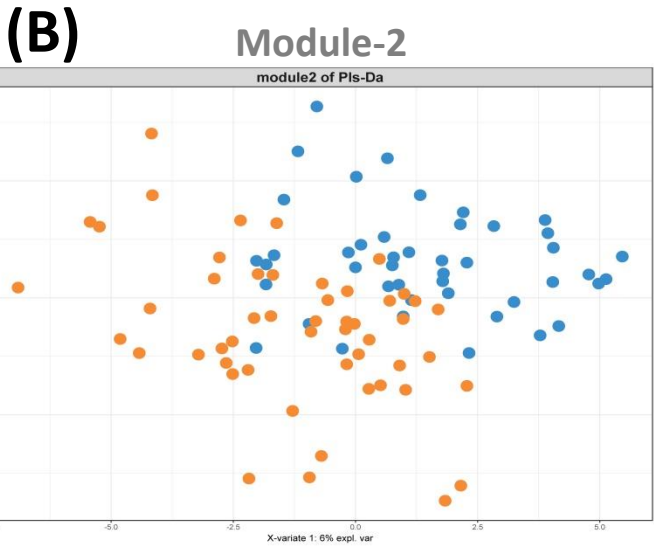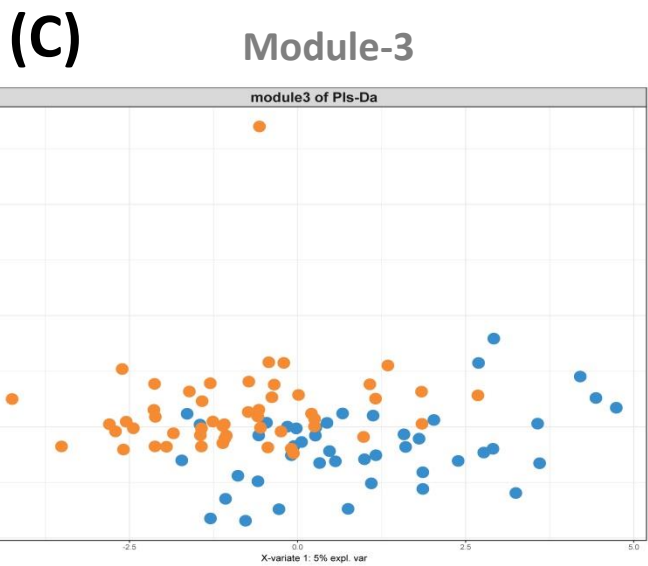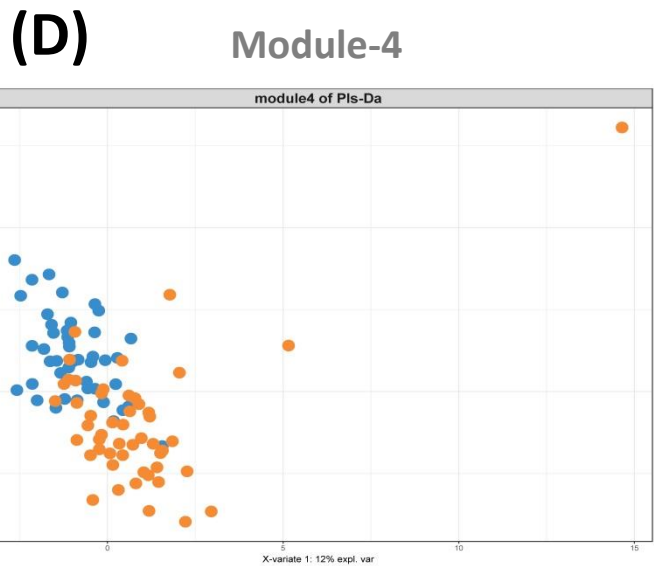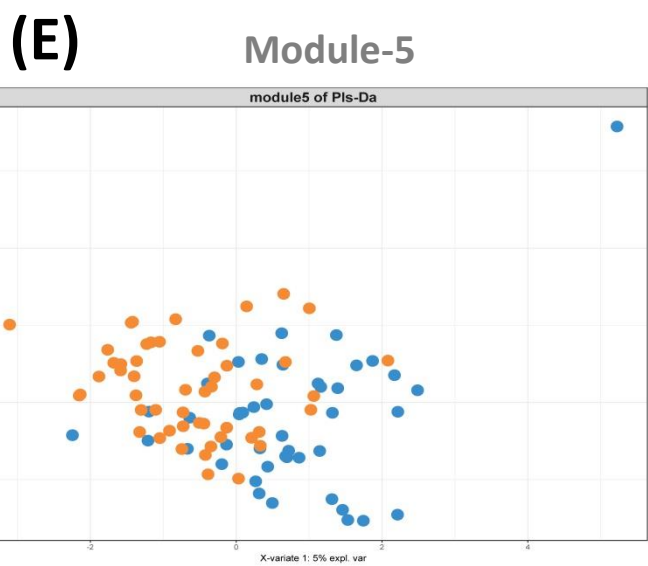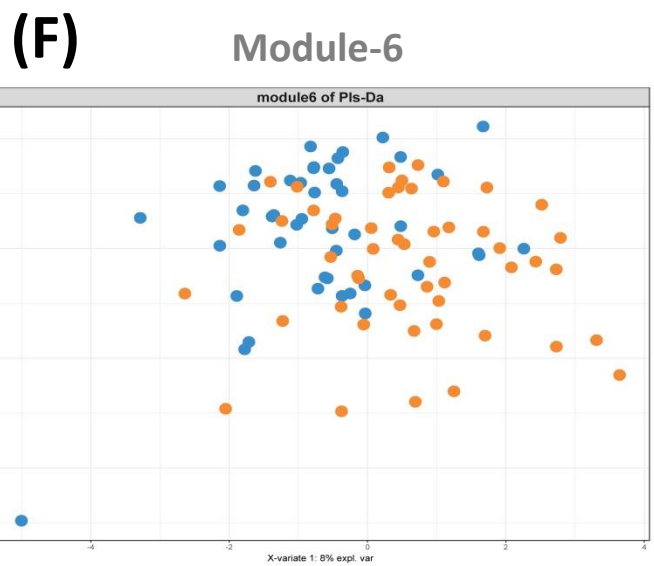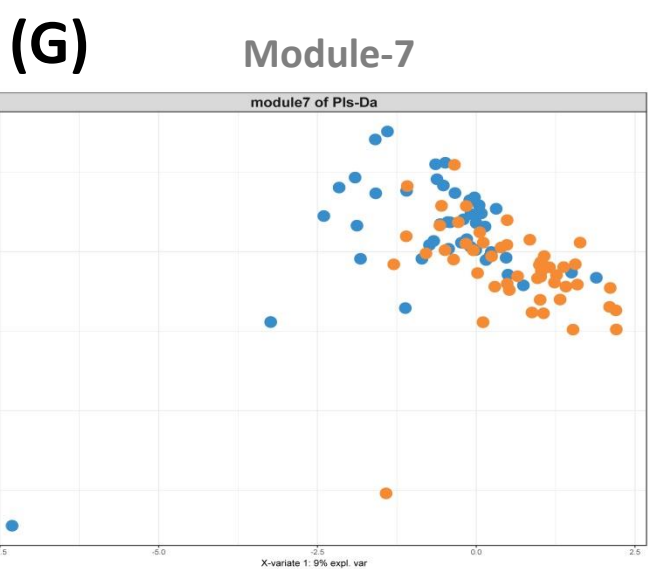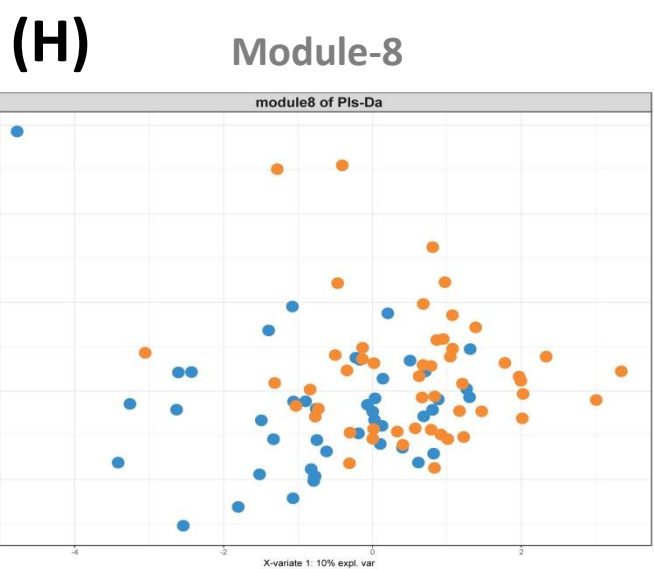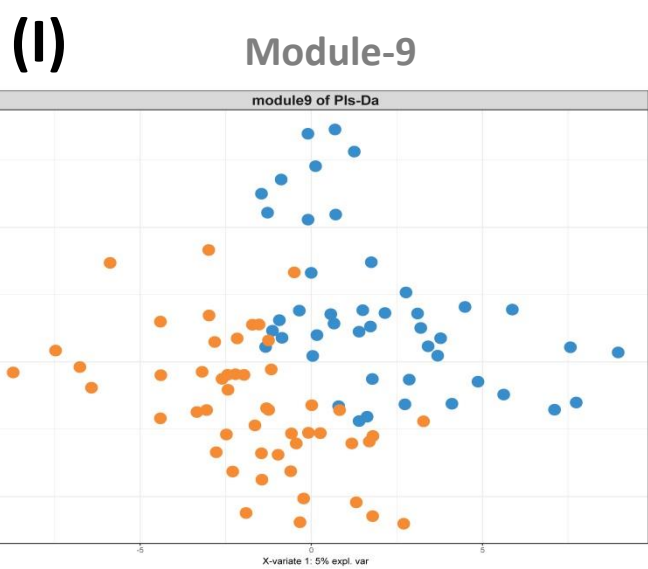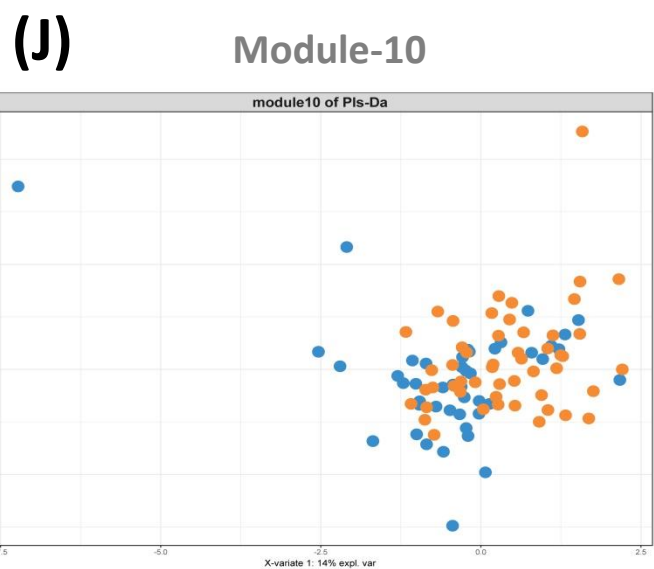

Supplement: Data_Sheet_1.ZIP [file Data_Sheet_1.ZIP]

(A)

Module-1

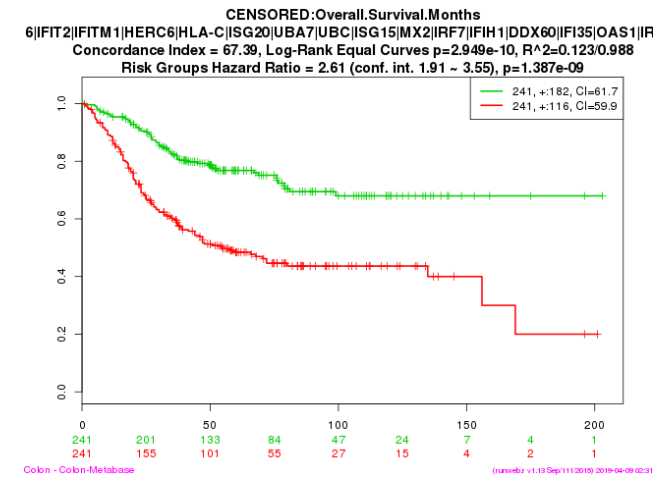

(B)

Module-2

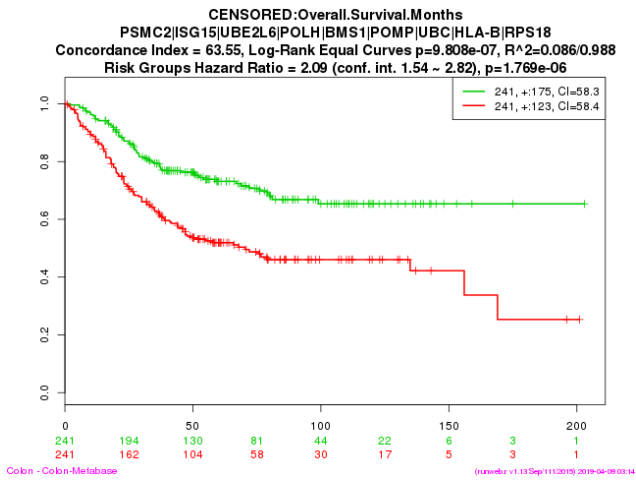

(C)

Module-3

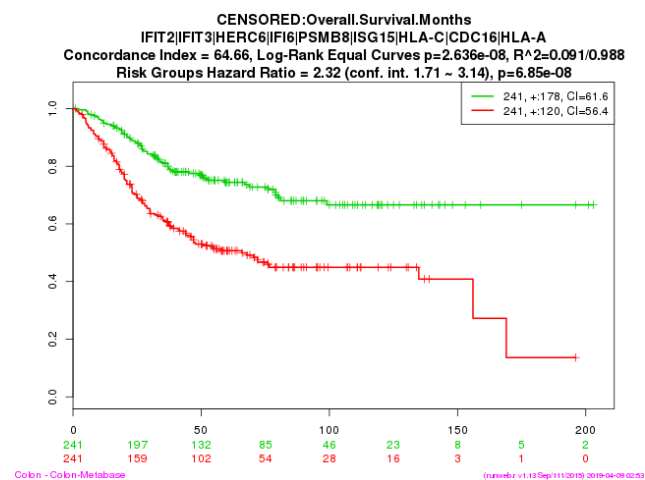

(D)

Module-4

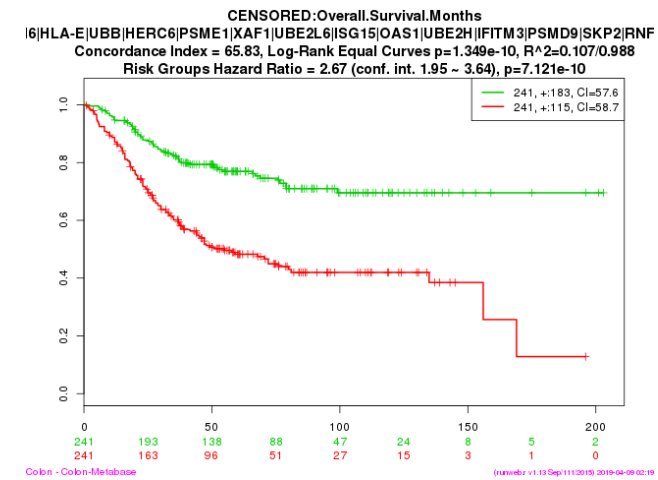

(E)

Module-5

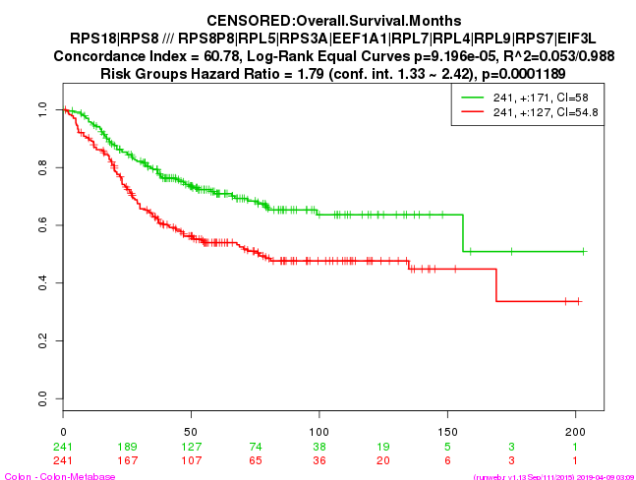

(F)

Module-6

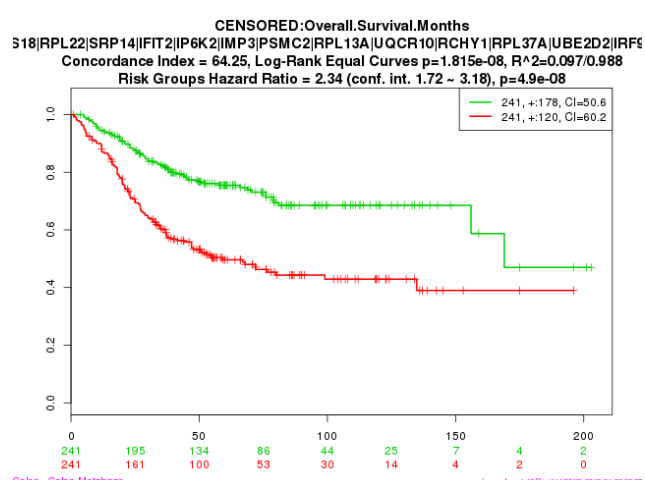

(G)

Module-7

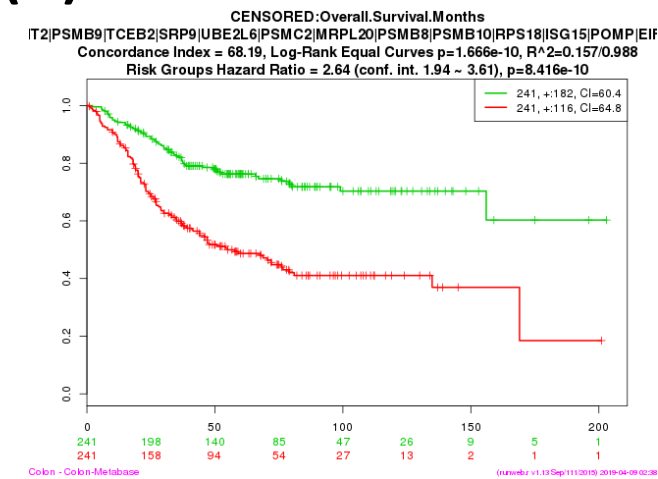

(H)

Module-8

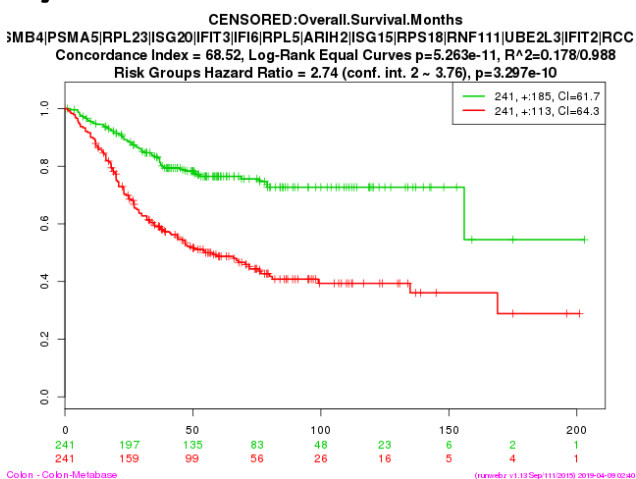

(I)

Module-9

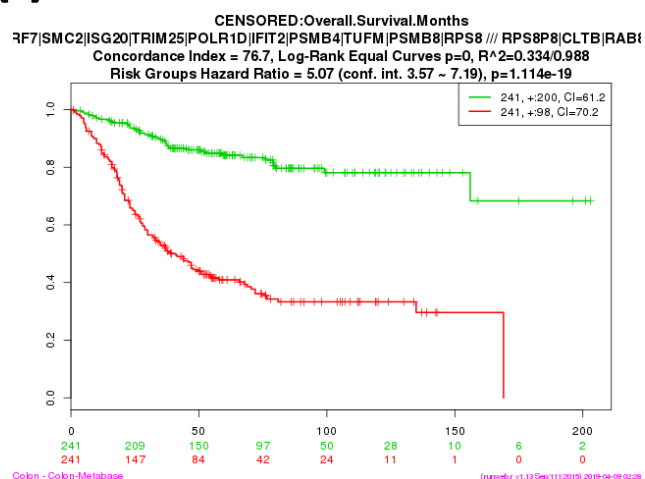

(J)

Module-10

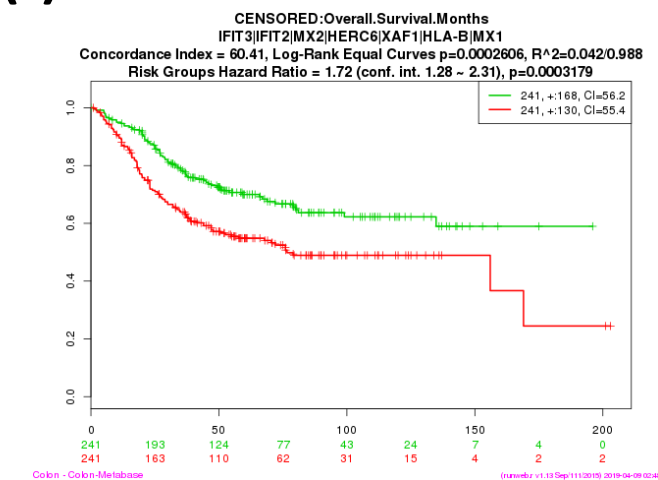

Supplement: Data_Sheet_1.ZIP [file Data_Sheet_1.ZIP]

nqtl-eqtl snps venn plot

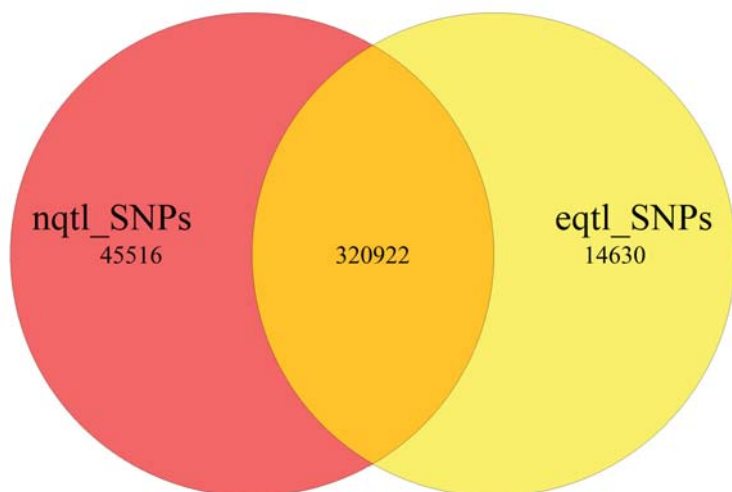

nqtl-eqtl genes venn plot

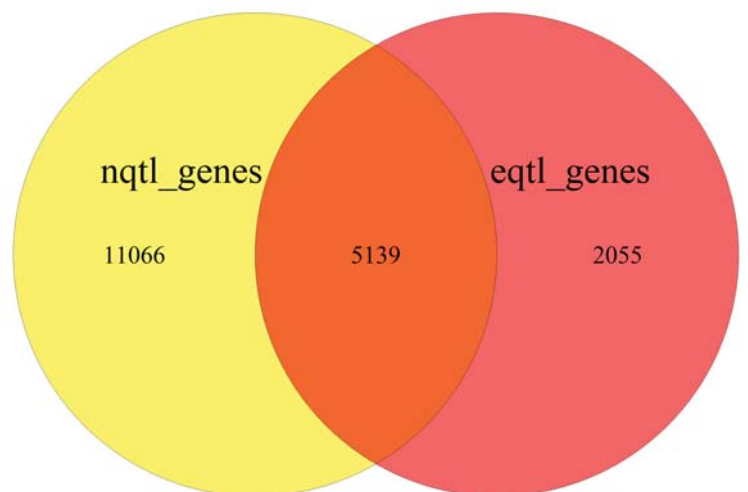

Supplement: Data_Sheet_1.ZIP [file Data_Sheet_1.ZIP]

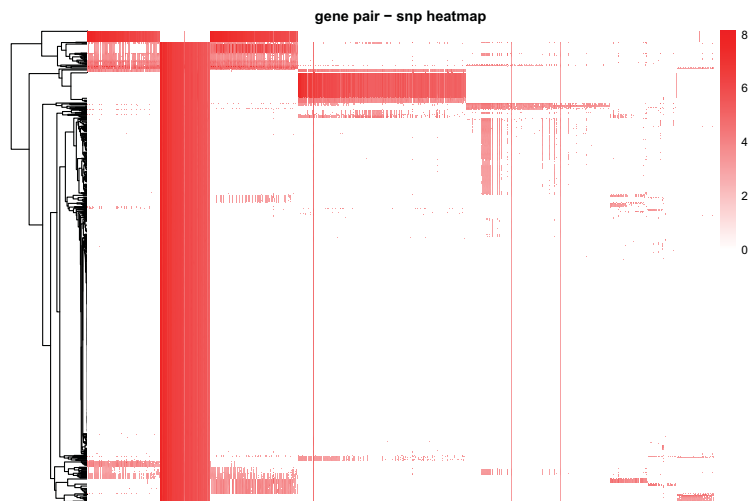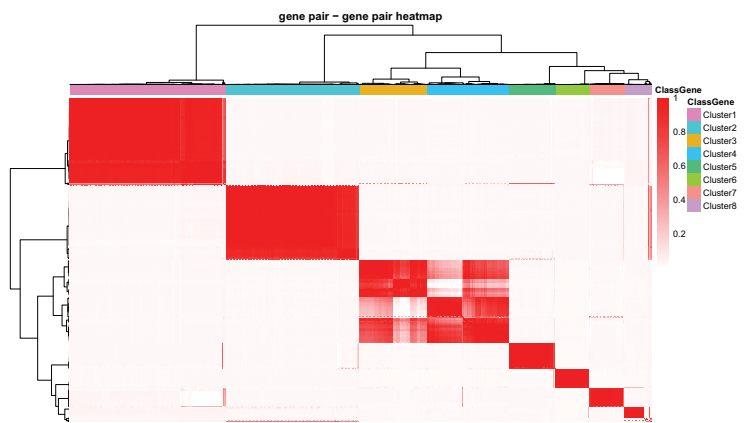

Supplement: Data_Sheet_1.ZIP [file Data_Sheet_1.ZIP]

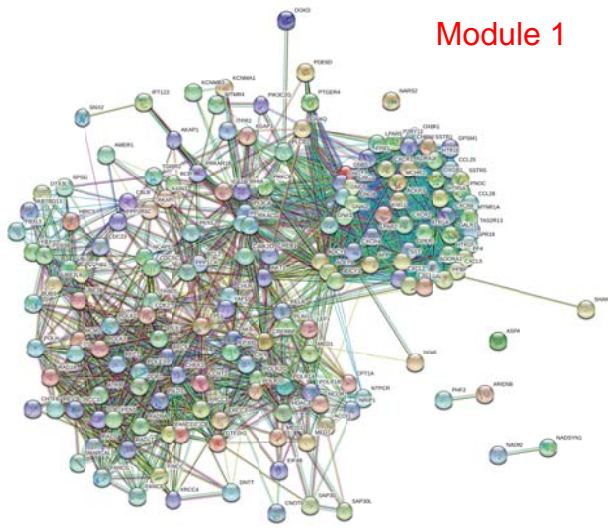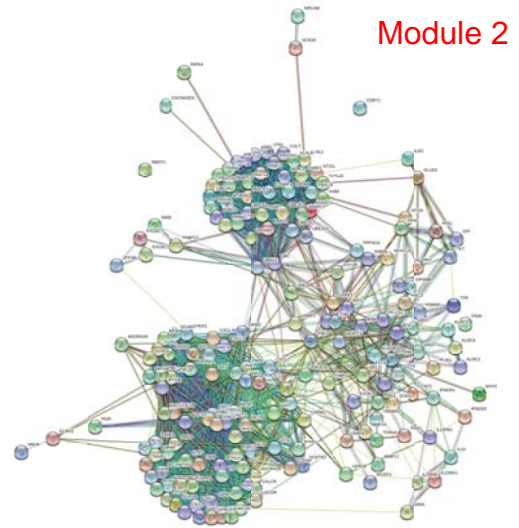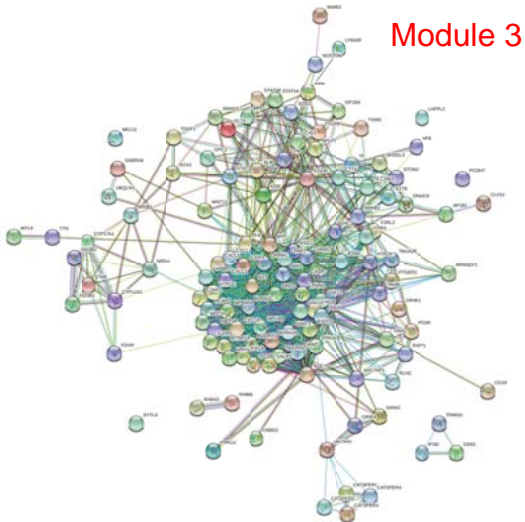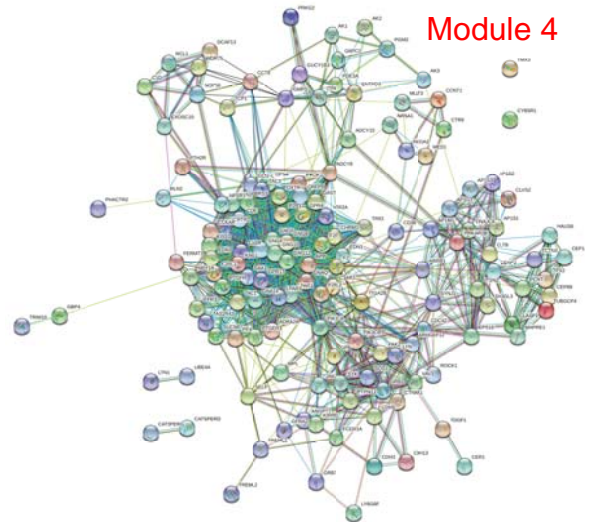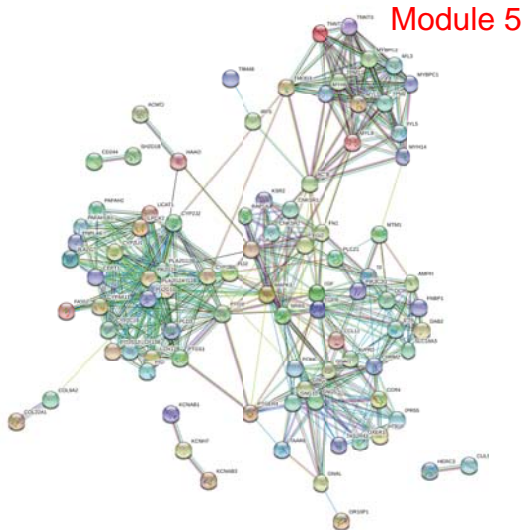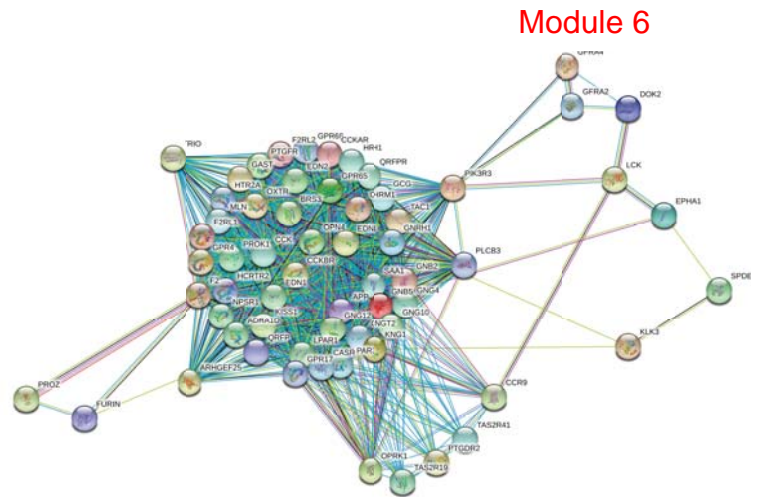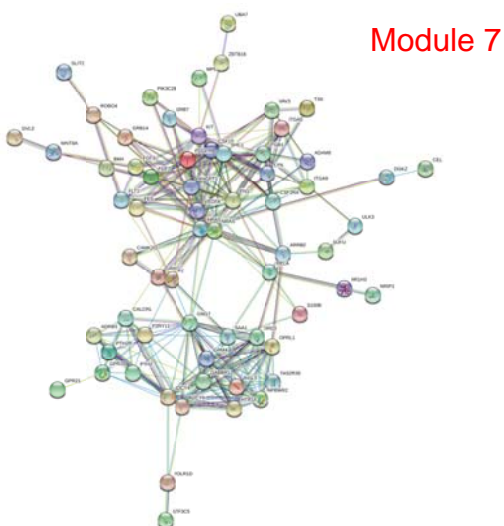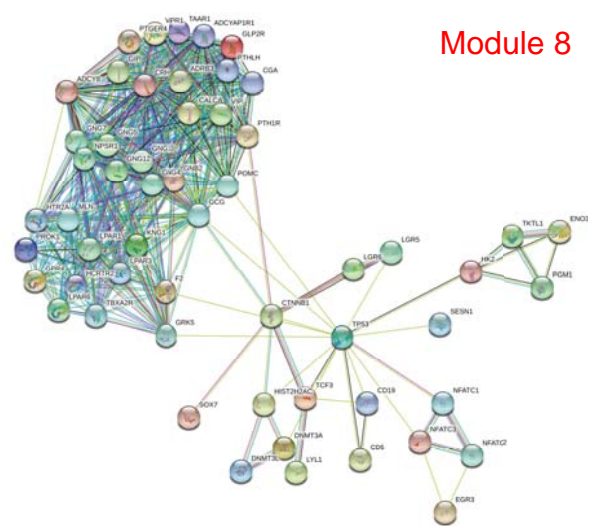

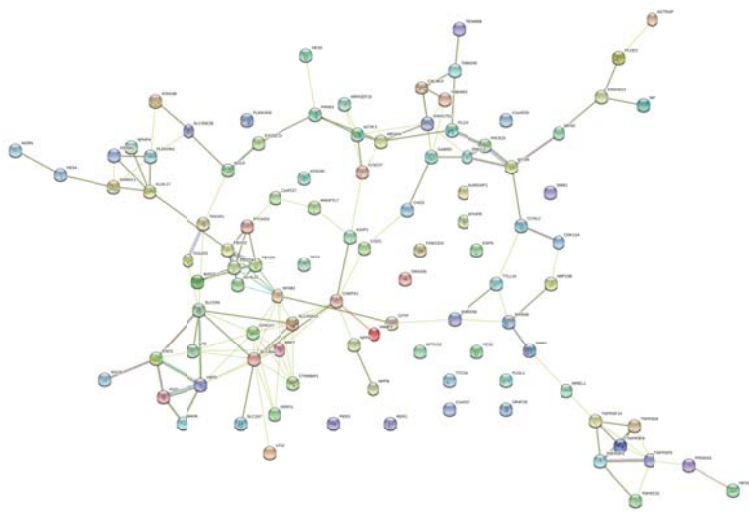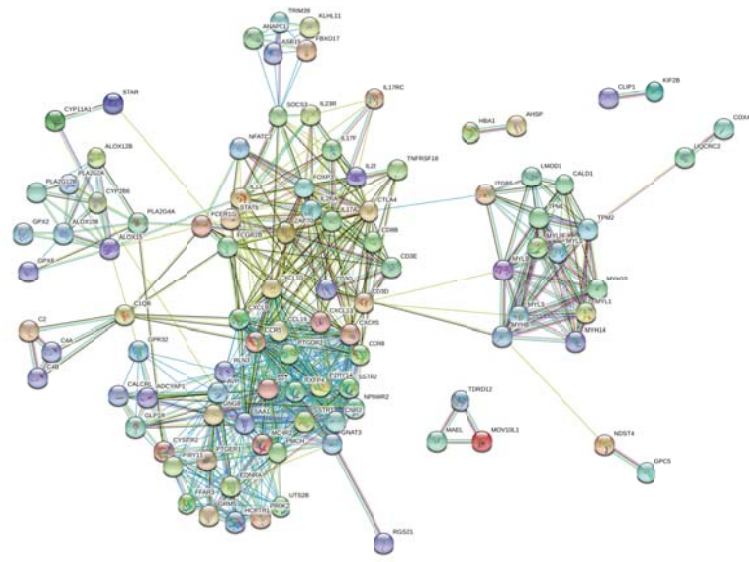

Supplement: Data_Sheet_1.ZIP [file Data_Sheet_1.ZIP]

(A)

## Module-1

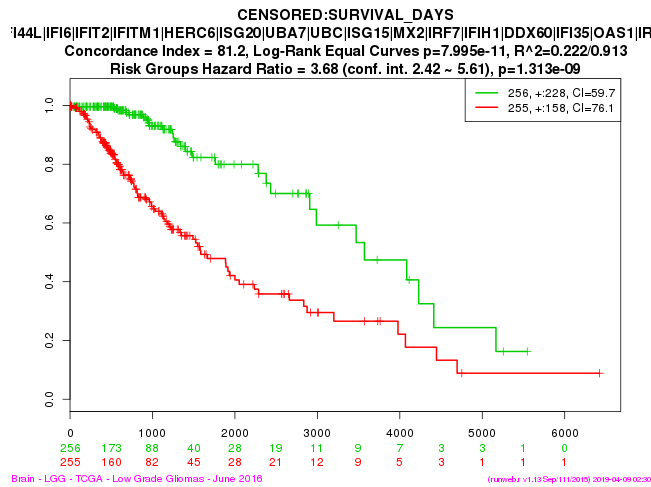

(B)

## Module-2

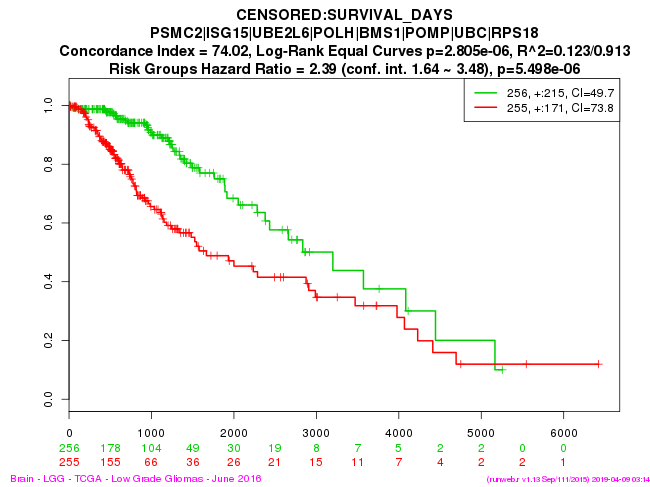

(C)

## Module-3

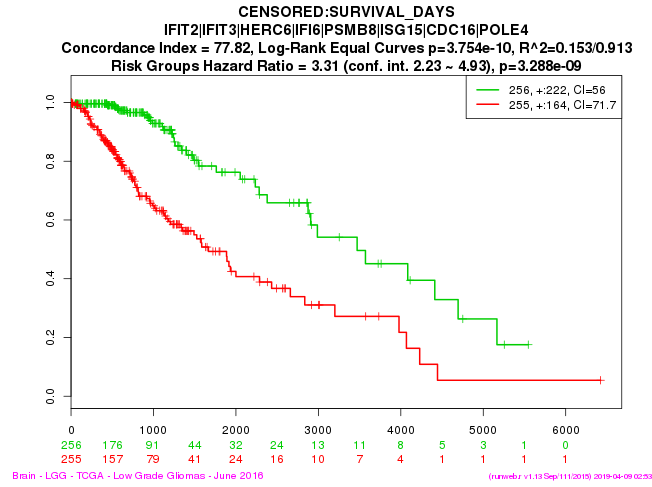

(D)

## Module-4

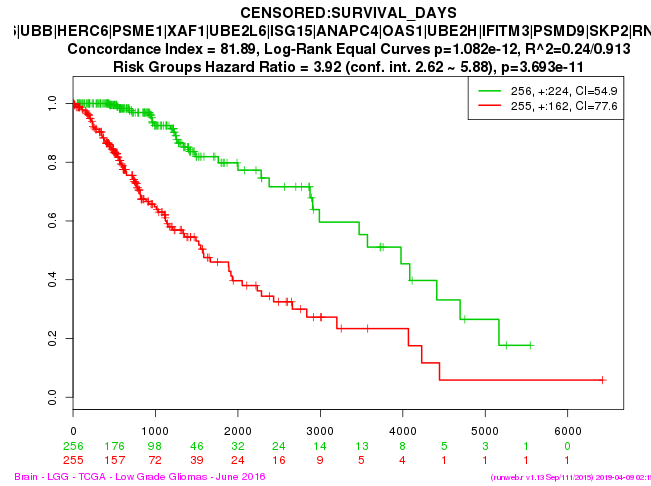

(E)

## Module-5

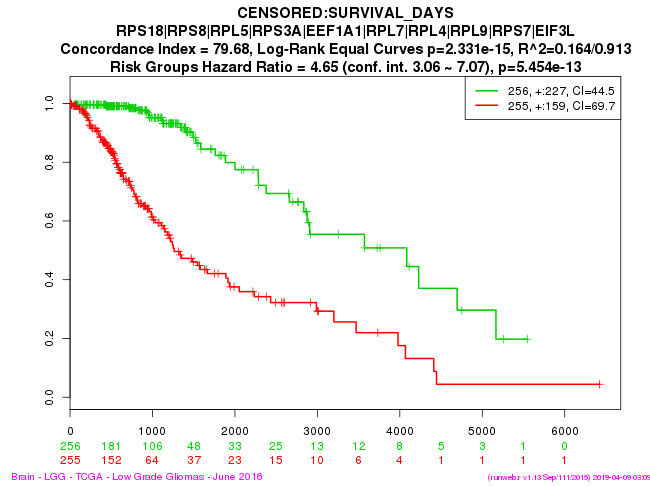

(F)

## Module-6

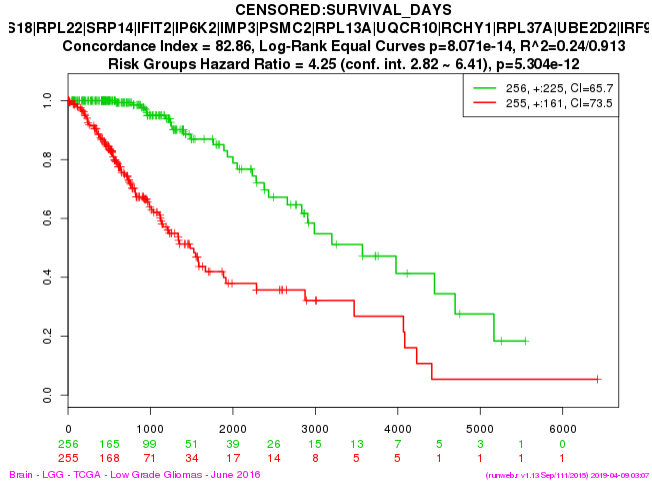

(G)

## Module-7

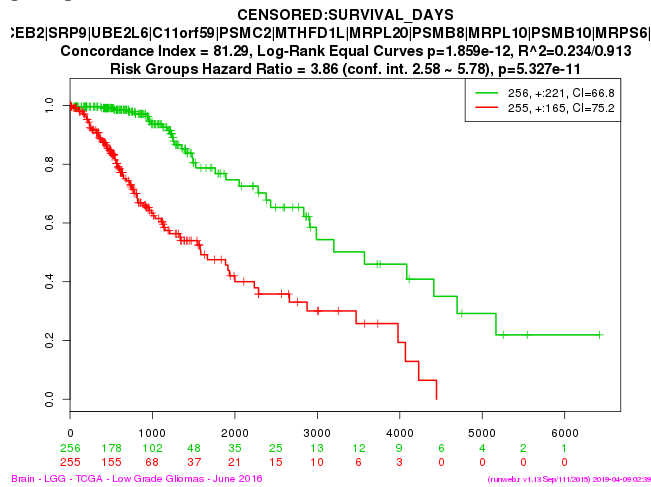

(H)

## Module-8

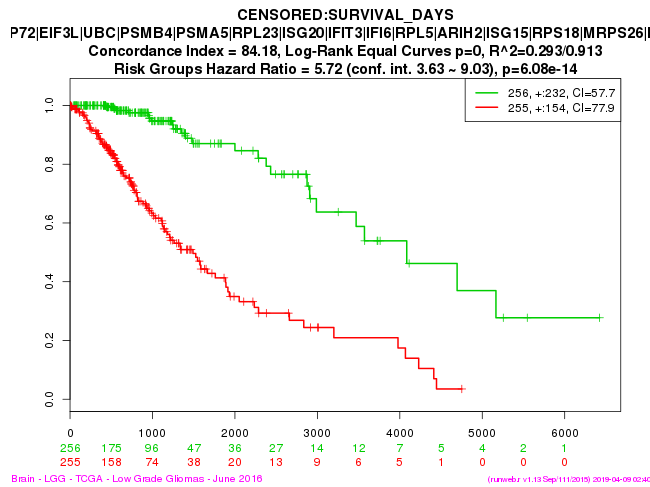

(I)

## Module-9

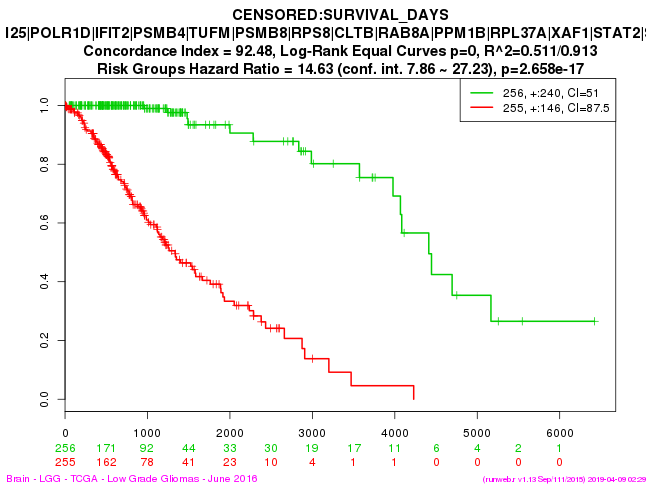

(J)

## Module-10

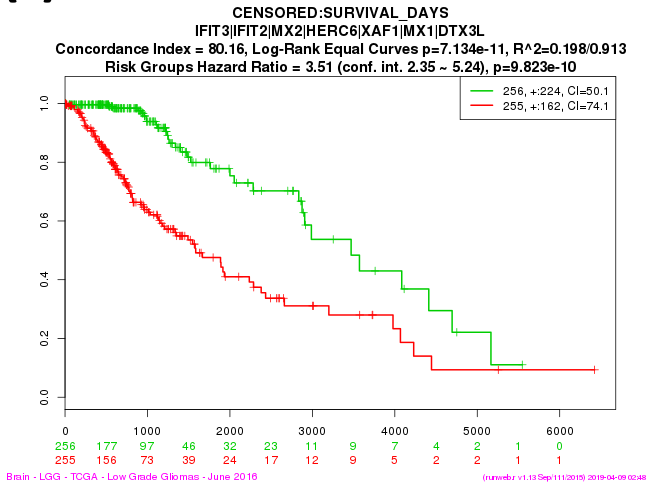

Supplement: Data_Sheet_1.ZIP [file Data_Sheet_1.ZIP]

nqtl-eqtl snps venn plot

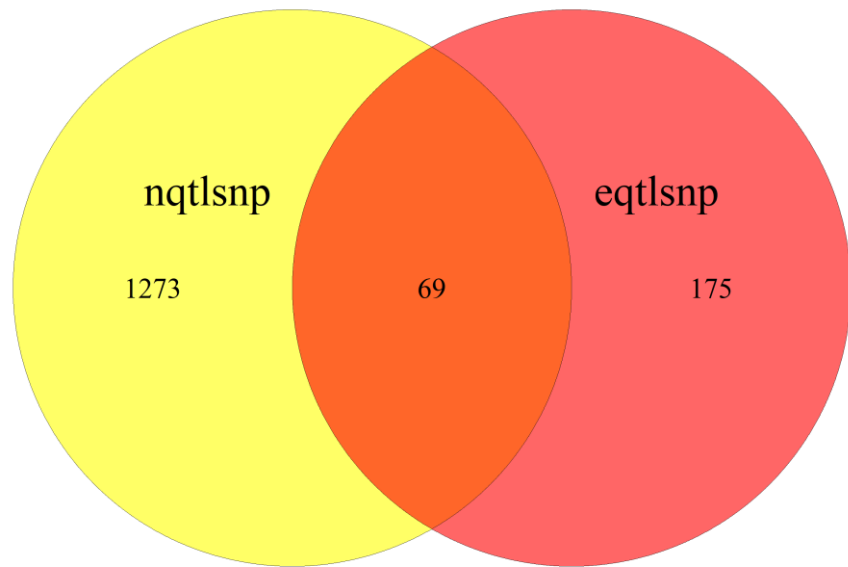

**(A)**

nqtl-eqtl genes venn plot

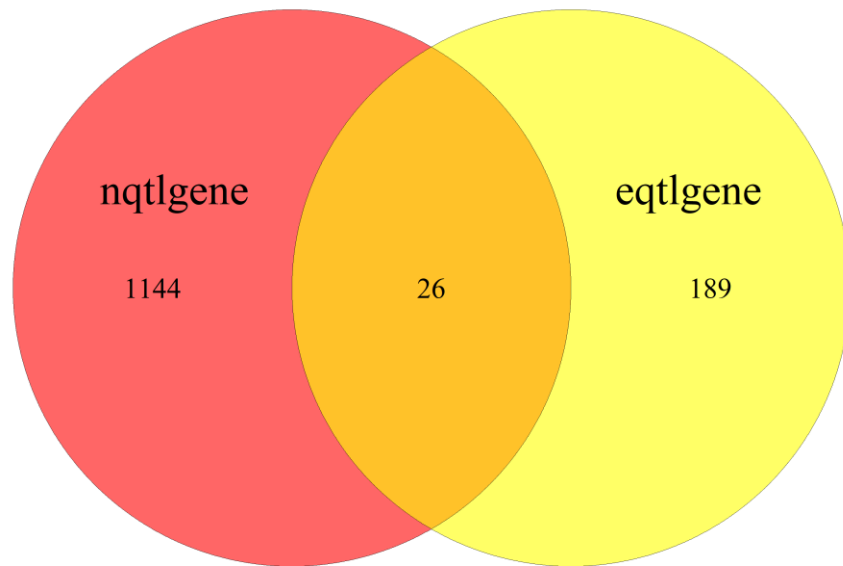

**(B)**

Supplement: Data_Sheet_1.ZIP [file Data_Sheet_1.ZIP]

(A)

### Module-1

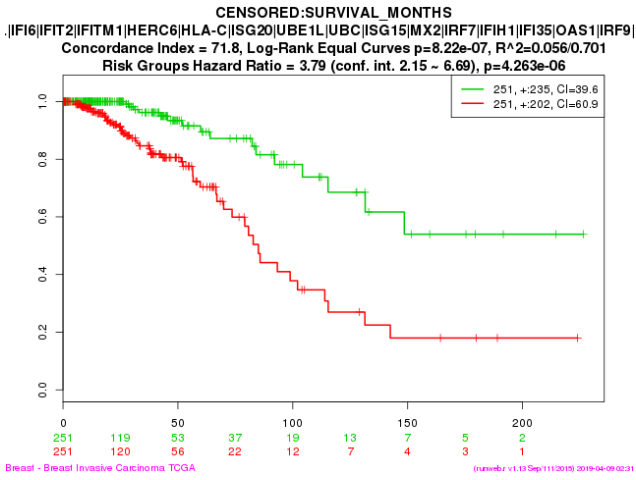

(B)

### Module-2

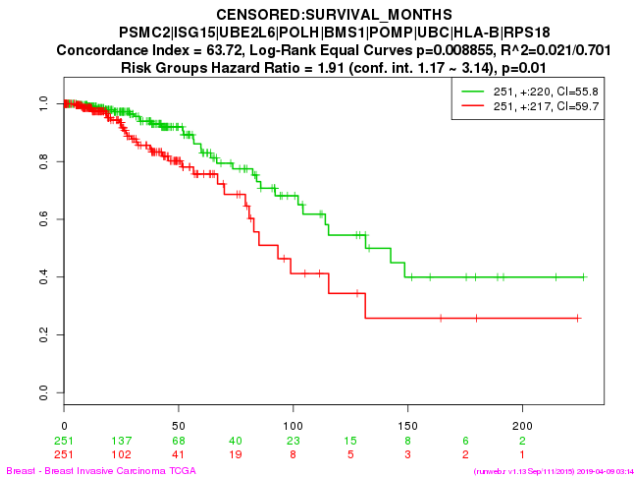

(C)

### Module-3

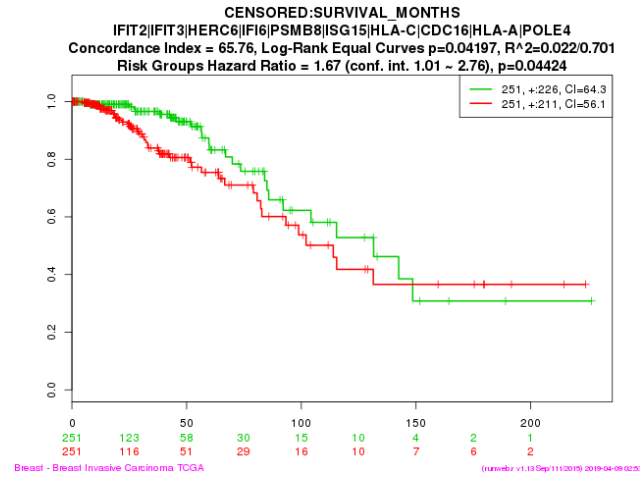

(D)

### Module-4

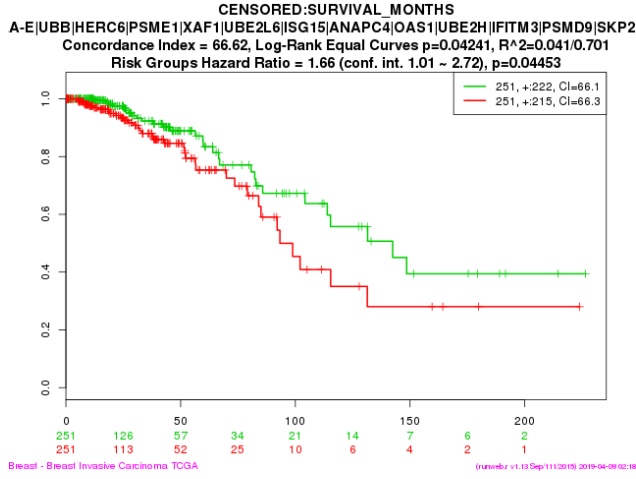

(E)

### Module-5

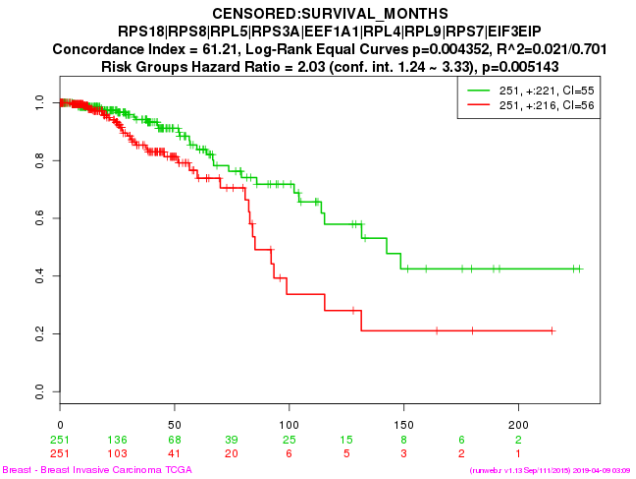

(F)

### Module-6

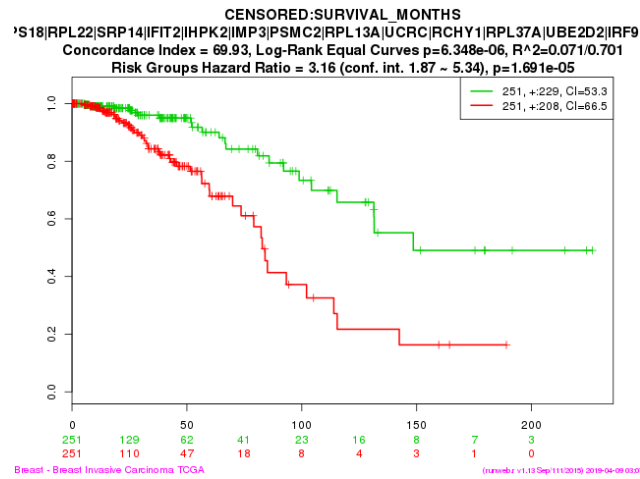

(G)

### Module-7

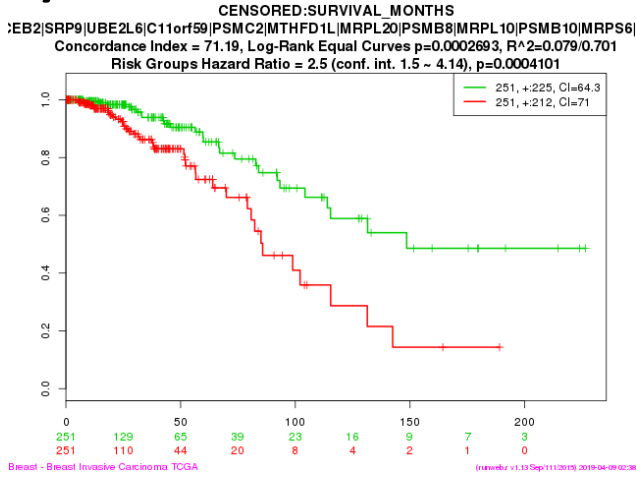

(H)

### Module-8

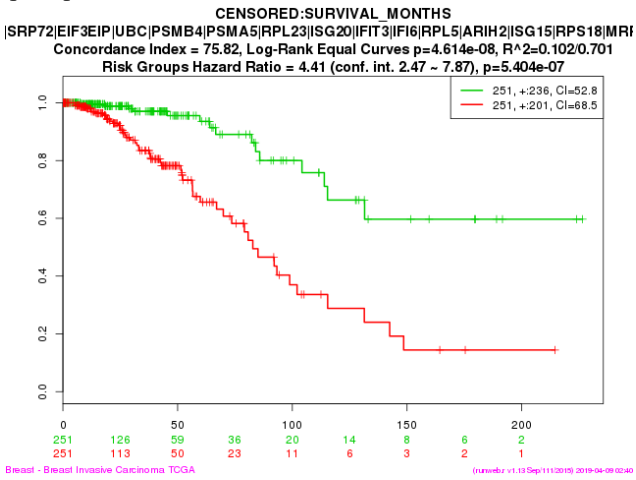

(I)

### Module-9

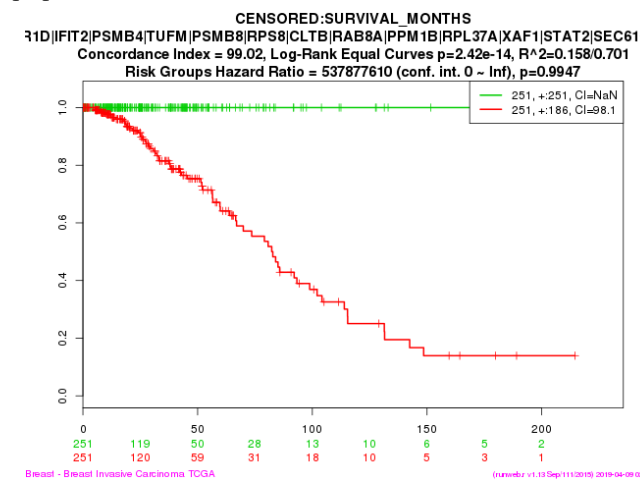

(J)

### Module-10

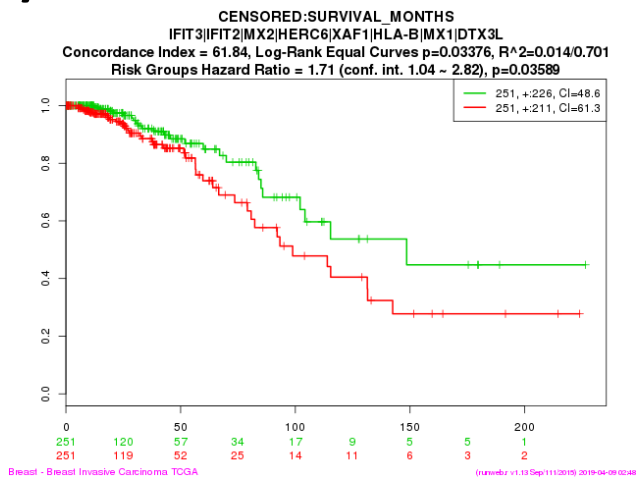

Supplement: Data_Sheet_1.ZIP [file Data_Sheet_1.ZIP]

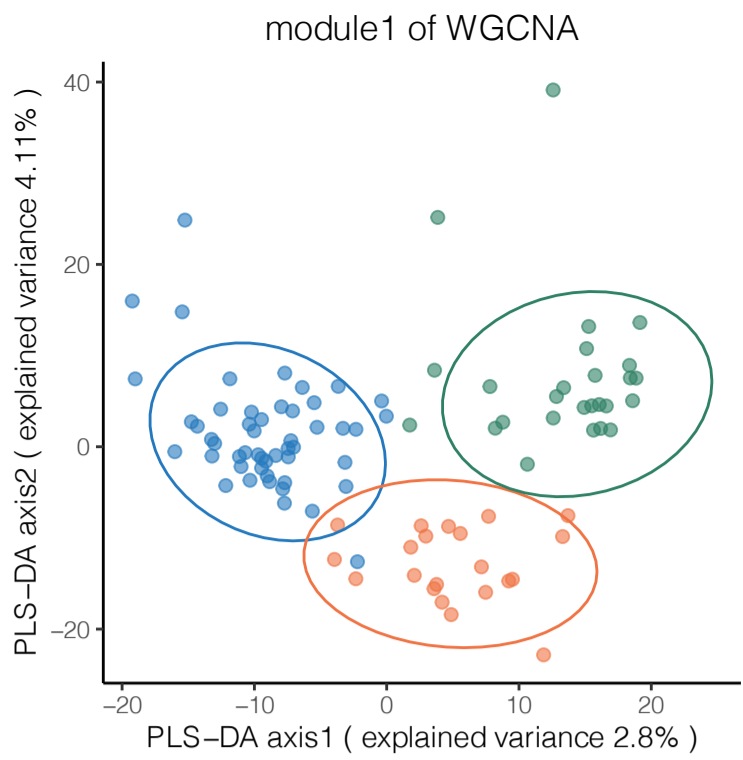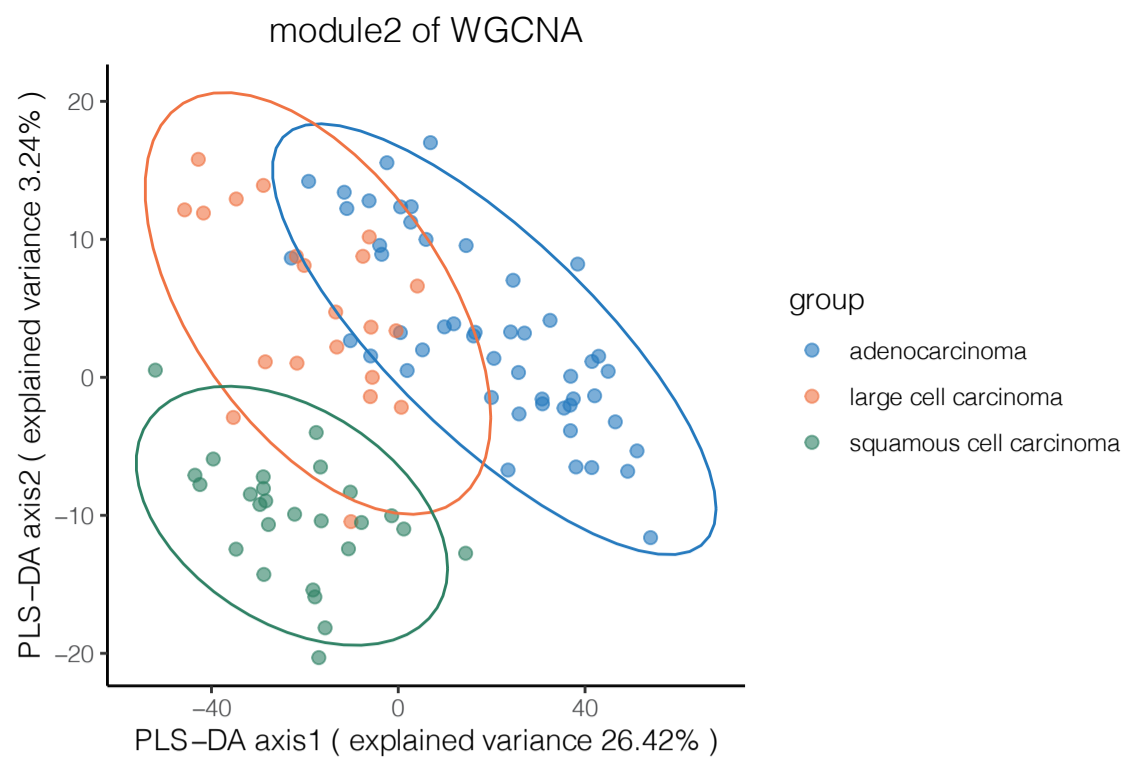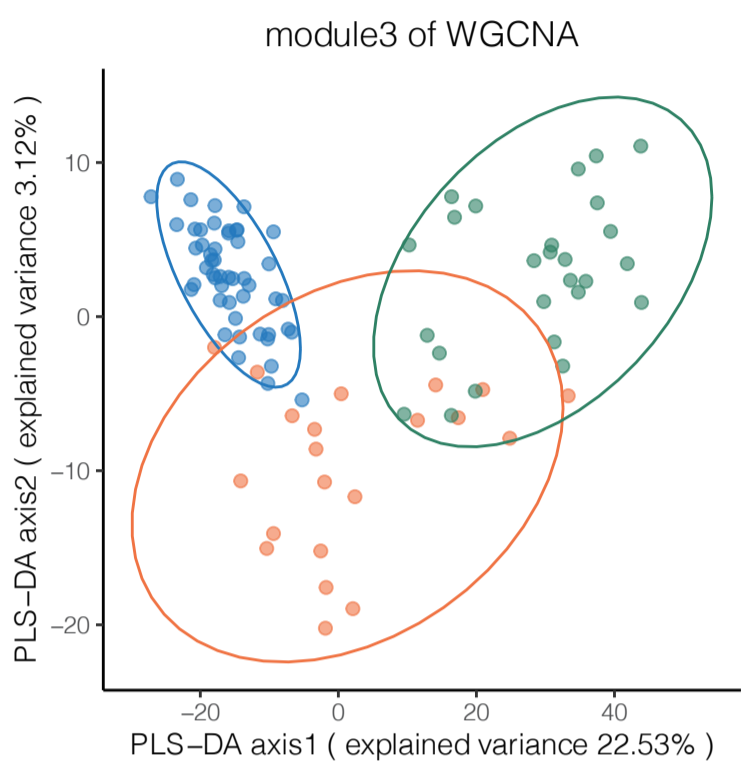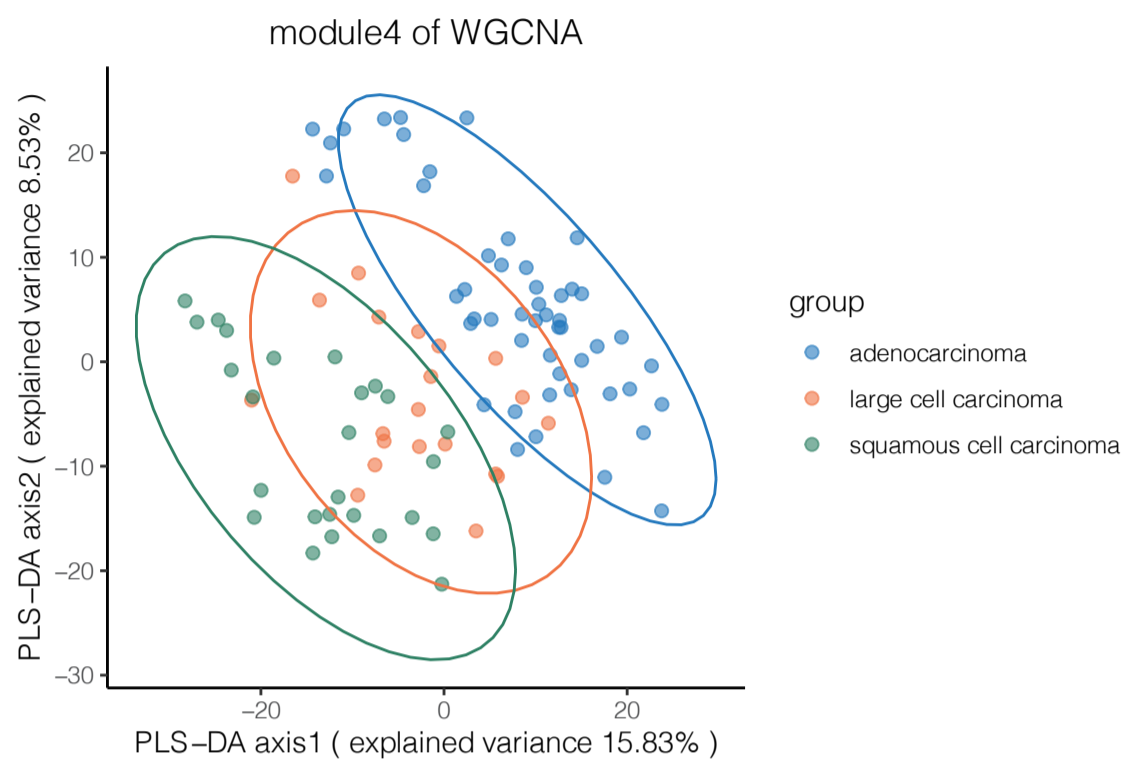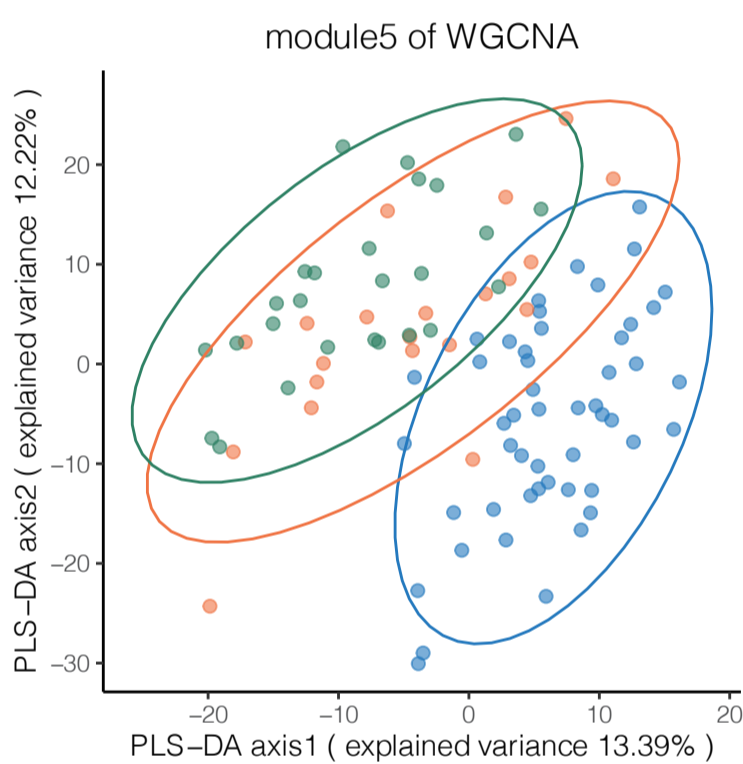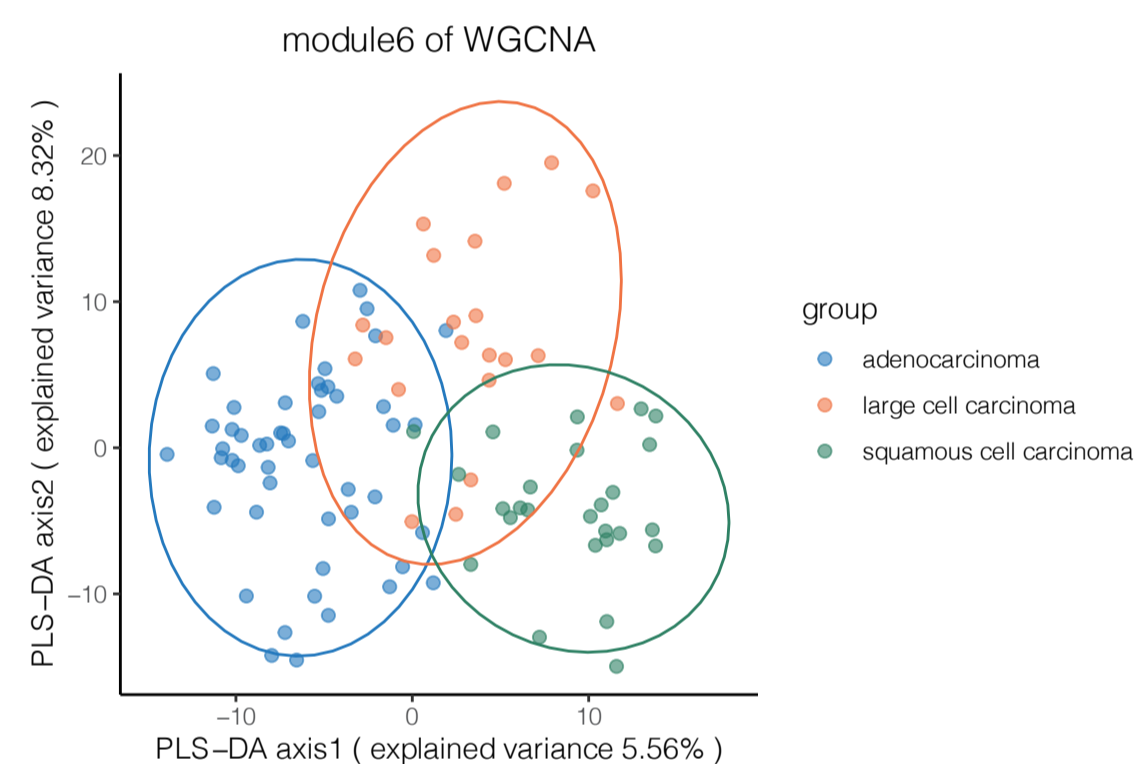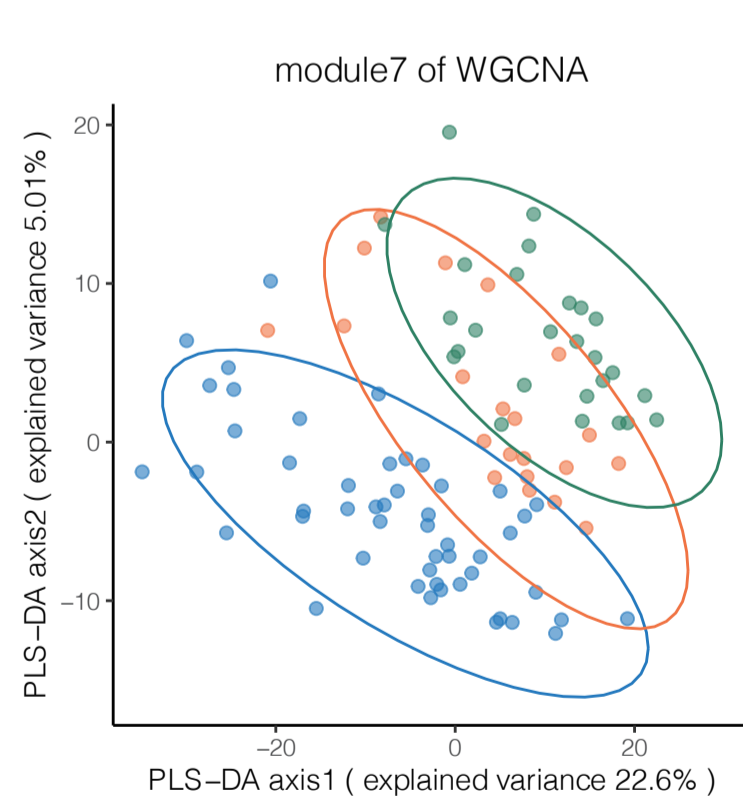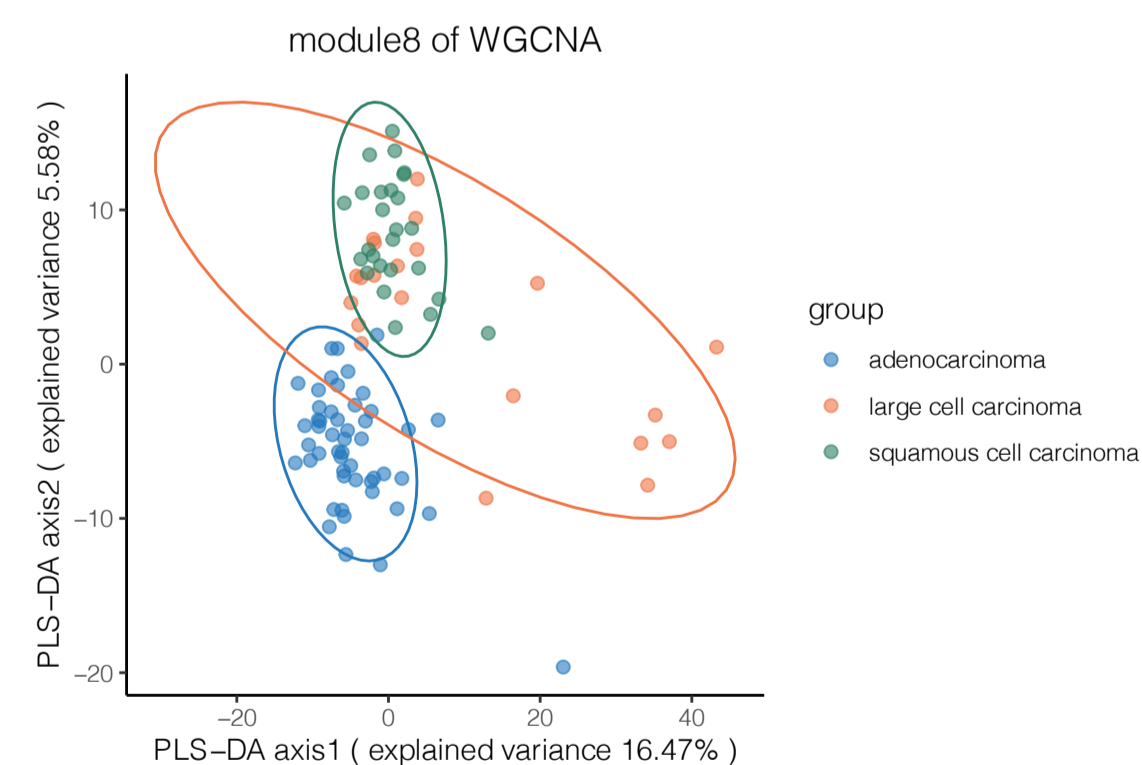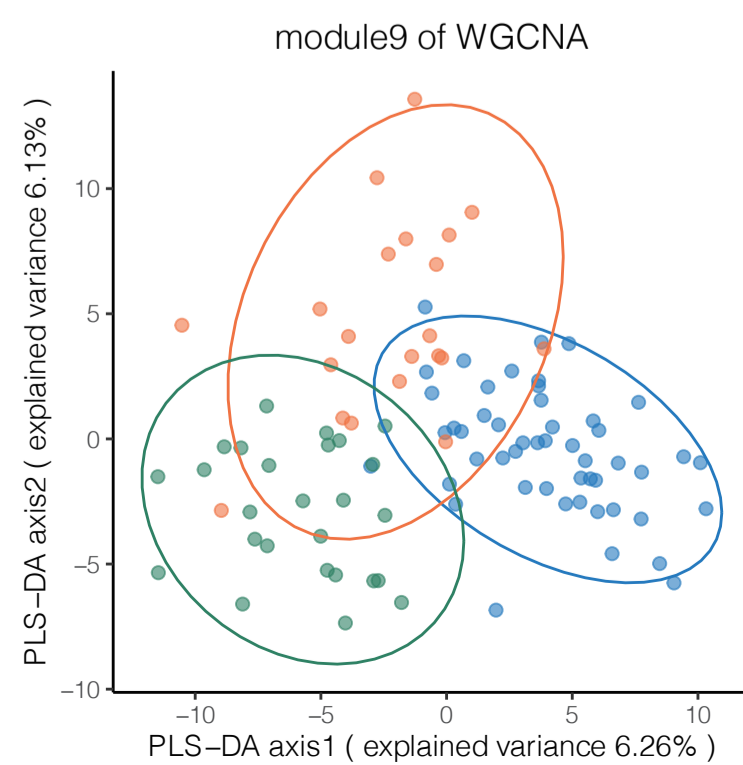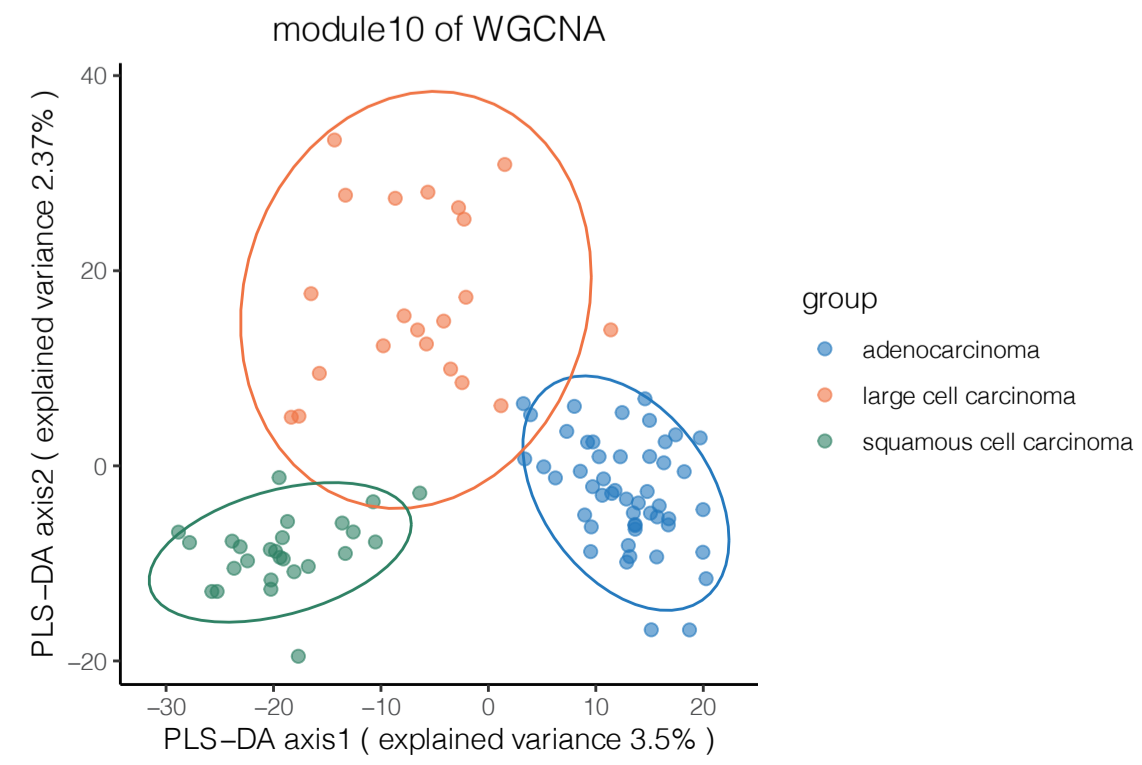

Supplement: Data_Sheet_1.ZIP [file Data_Sheet_1.ZIP]

(A)

### Module-1

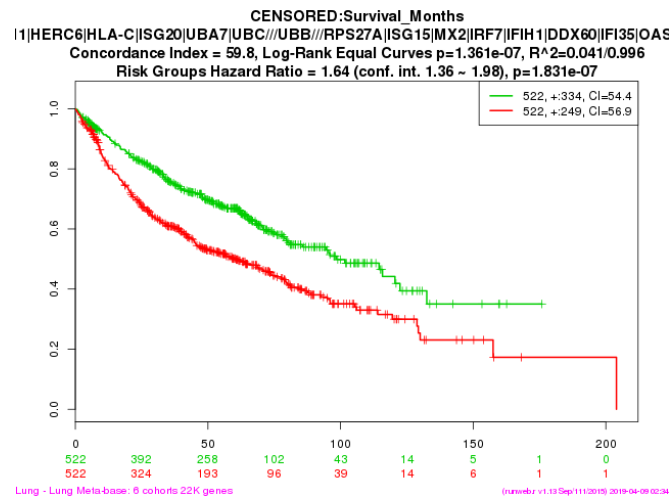

(B)

### Module-2

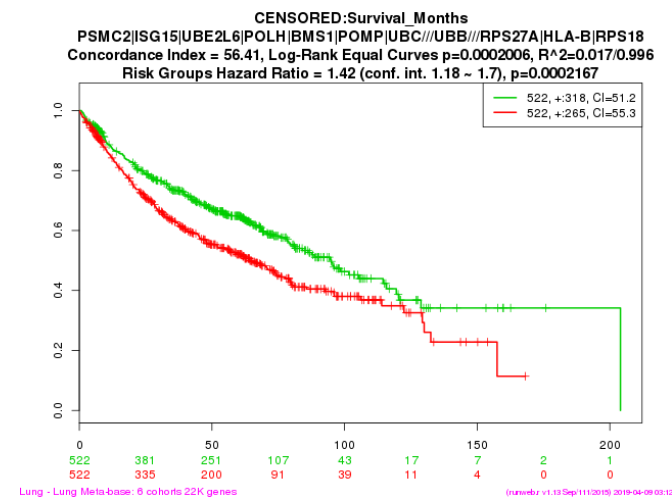

(C)

### Module-3

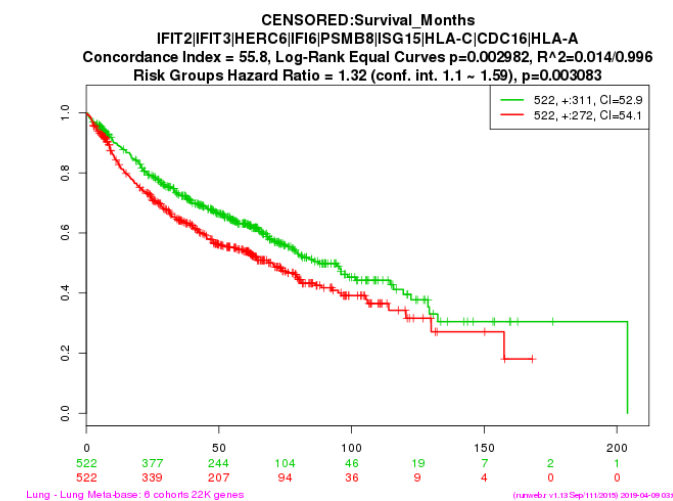

(D)

### Module-4

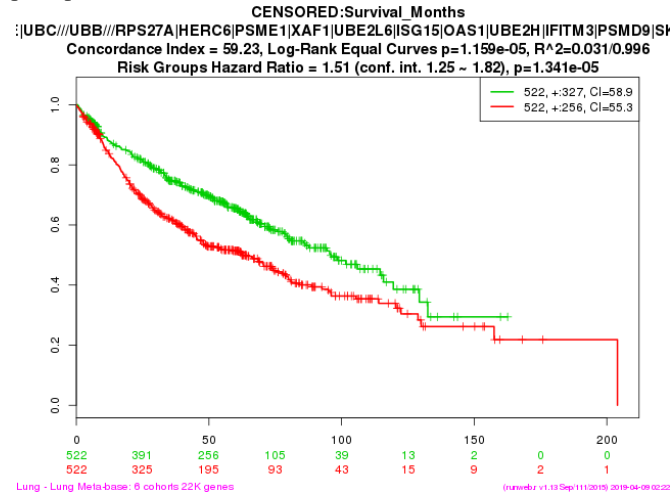

(E)

### Module-5

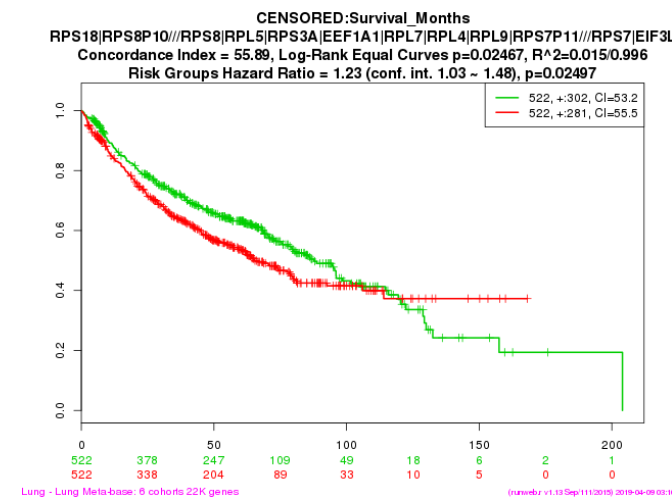

(F)

### Module-6

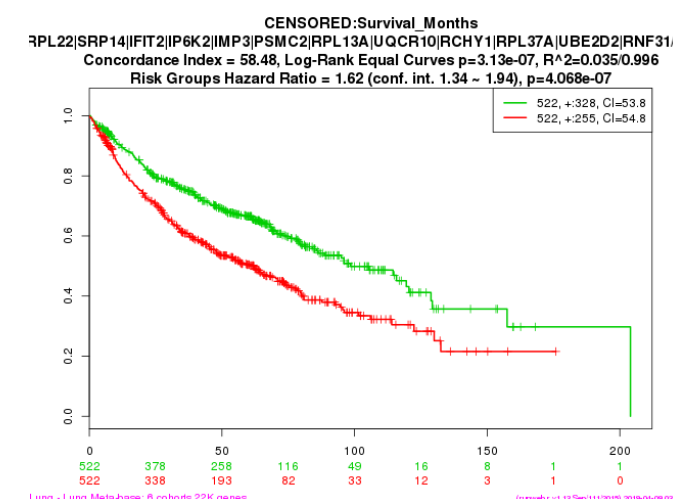

(G)

### Module-7

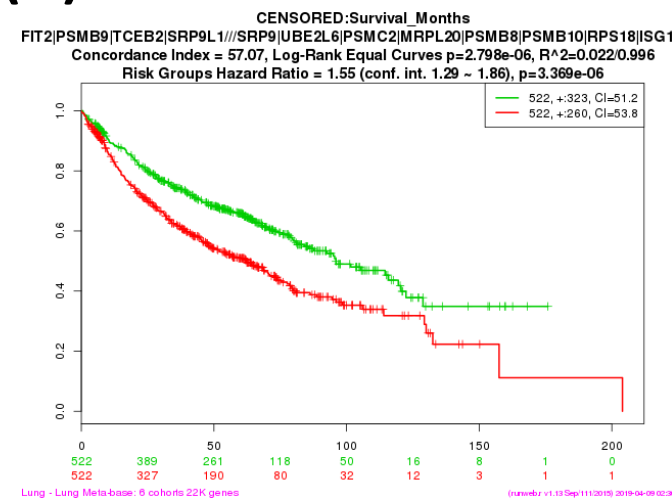

(H)

### Module-8

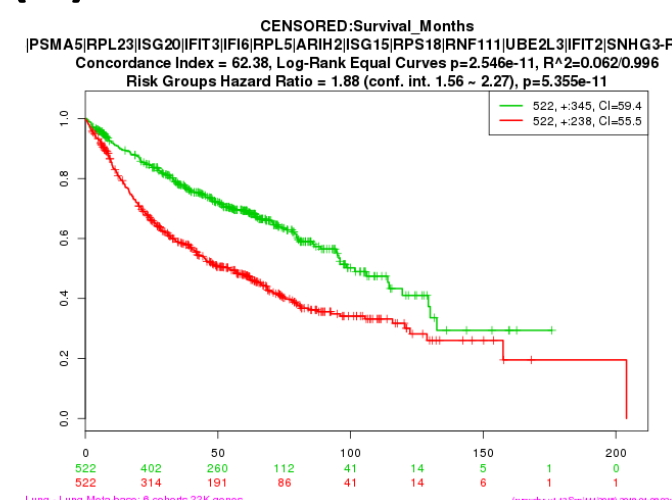

(I)

### Module-9

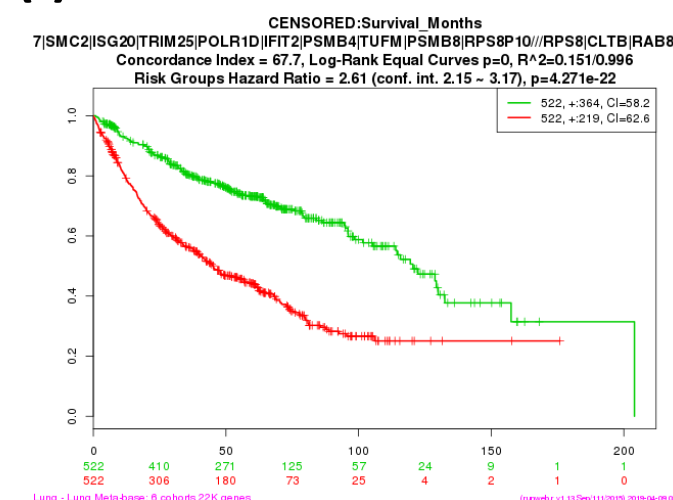

(J)

### Module-10

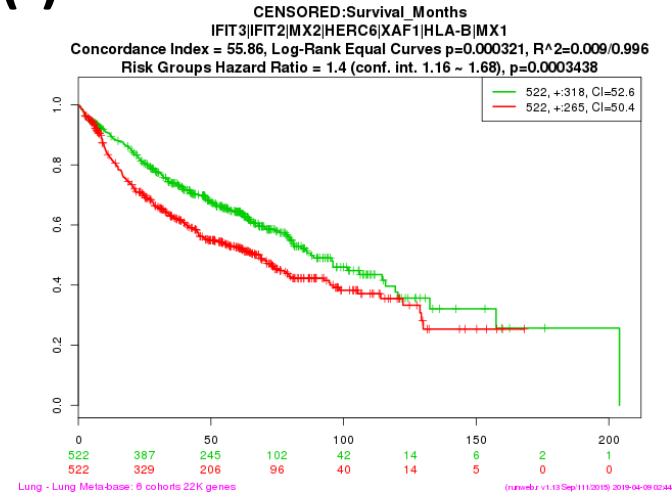

Supplement: Data_Sheet_1.ZIP [file Data_Sheet_1.ZIP]

## eQTL Manhattan plot on GSE28571

(A)

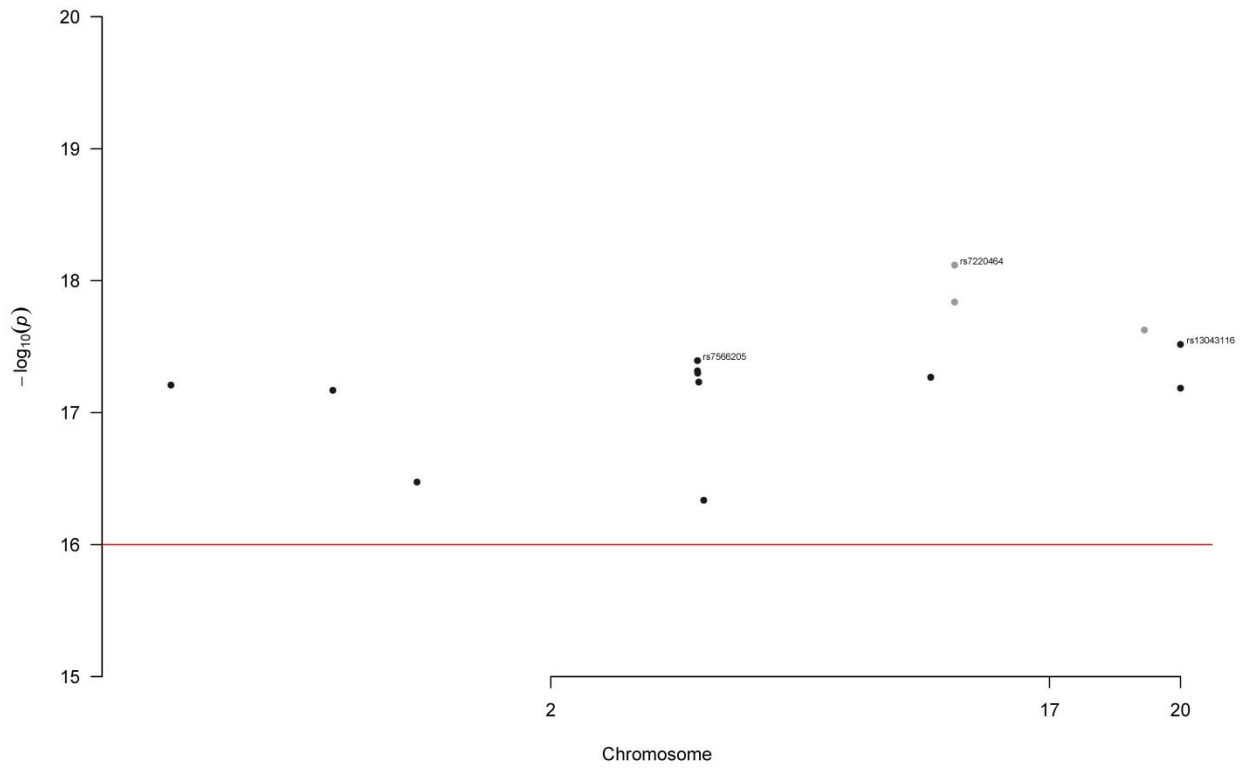

## nQTL Manhattan plot on GSE28571

(B)

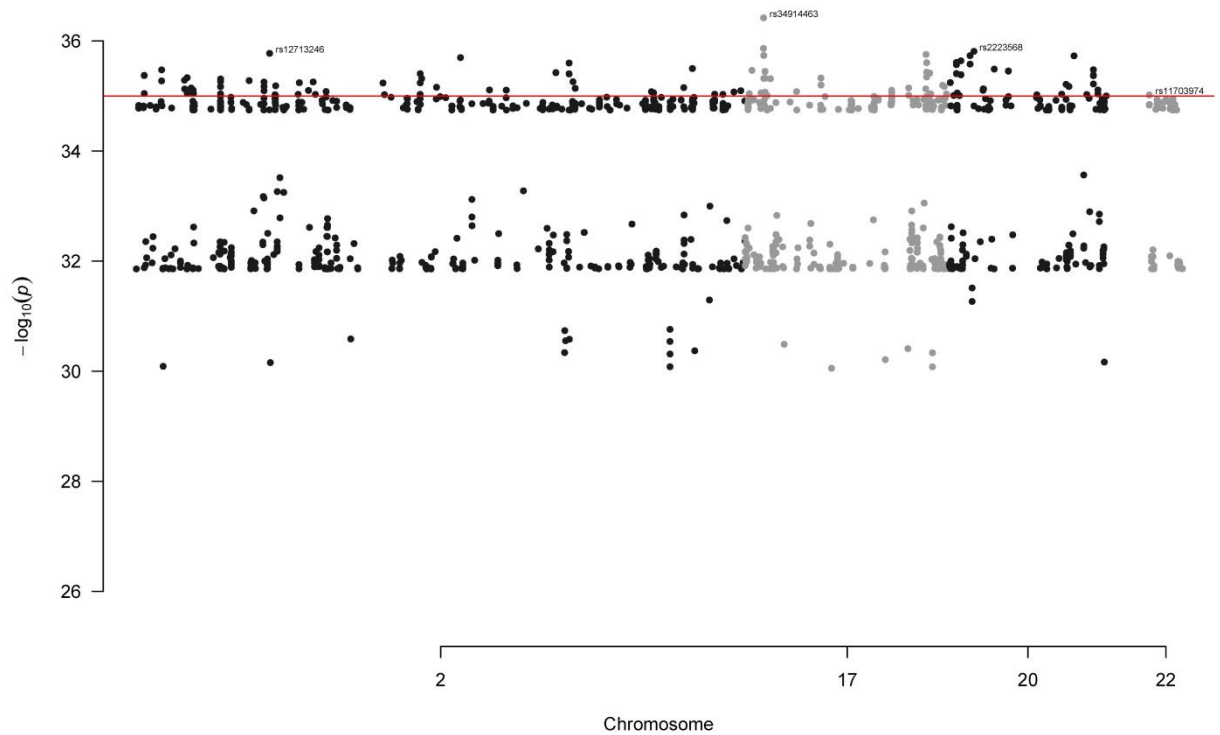

Supplement: Data_Sheet_1.ZIP [file Data_Sheet_1.ZIP]

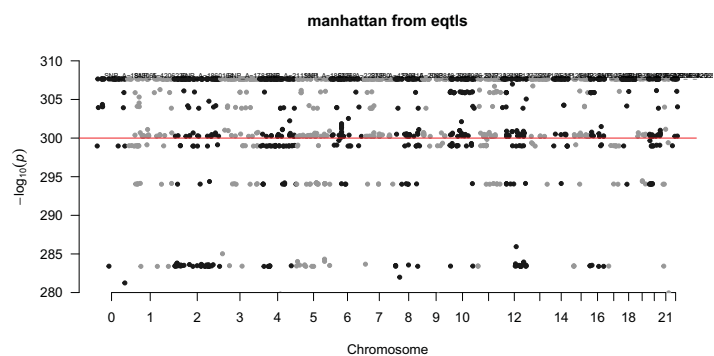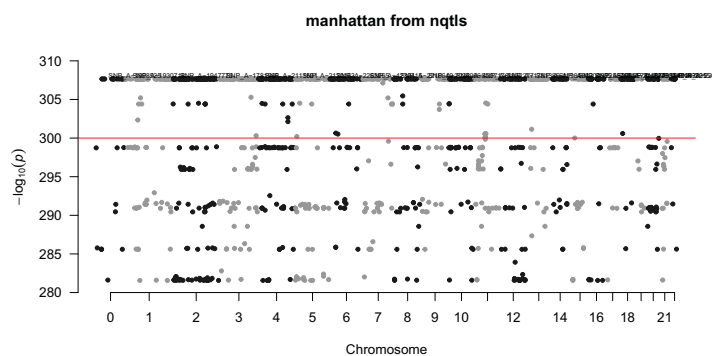

Supplement: Data_Sheet_1.ZIP [file Data_Sheet_1.ZIP]

(A)

Module-1

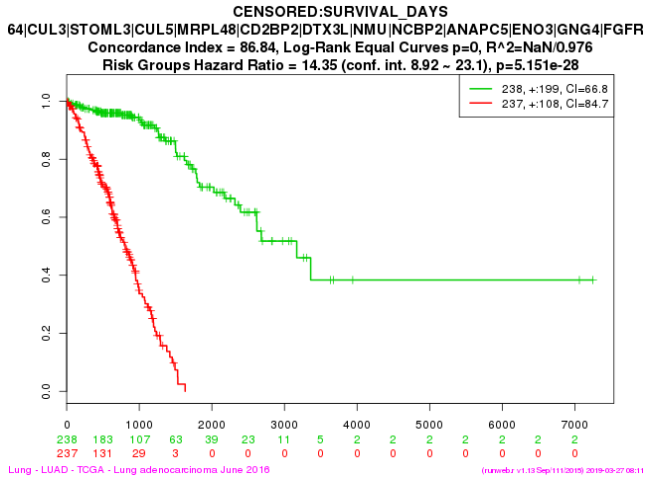

(B)

Module-2

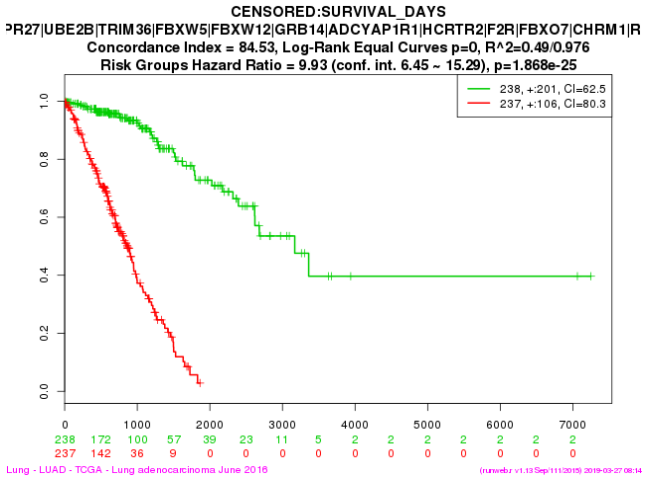

(C)

Module-3

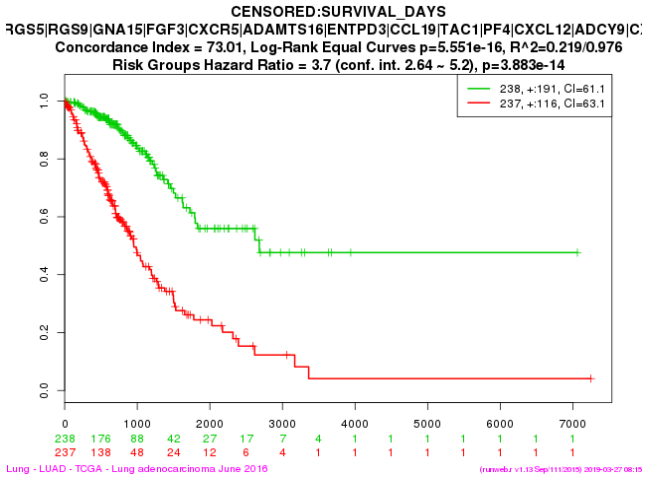

(D)

Module-4

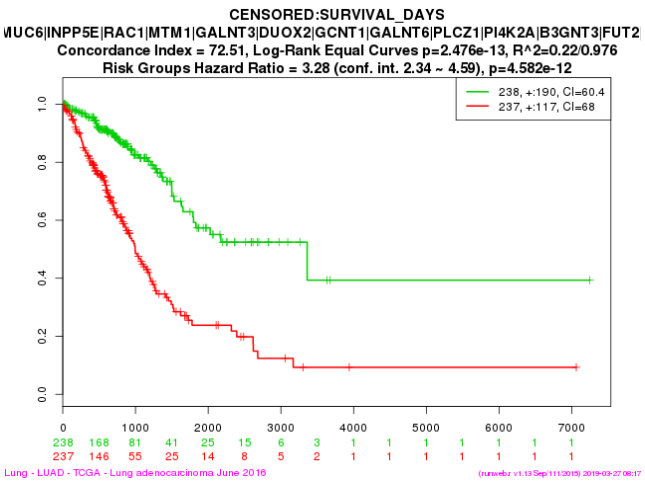

(E)

Module-5

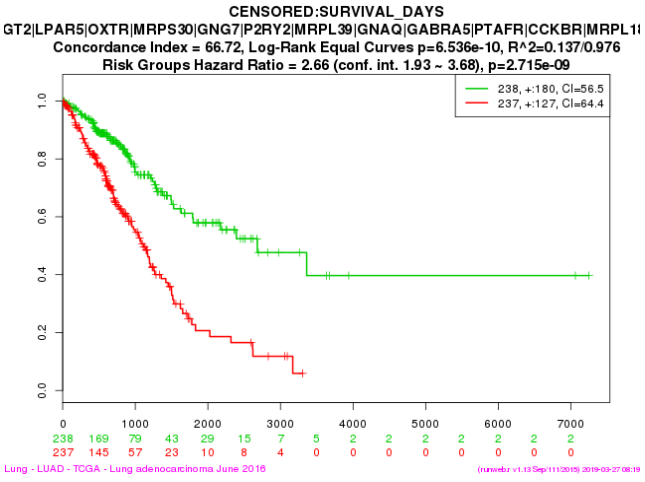

(F)

Module-6

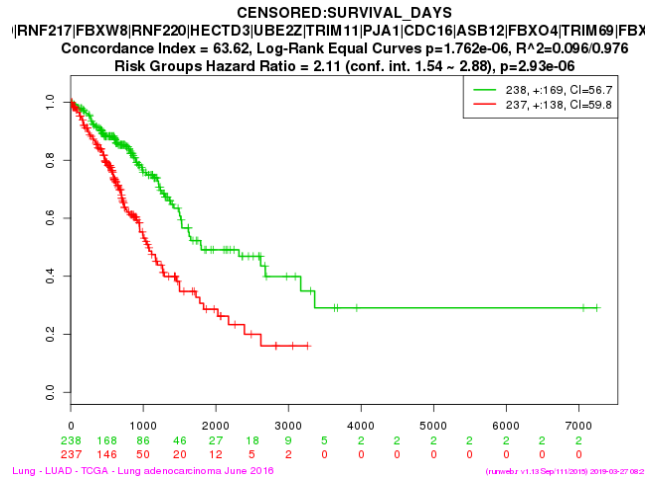

(G)

Module-7

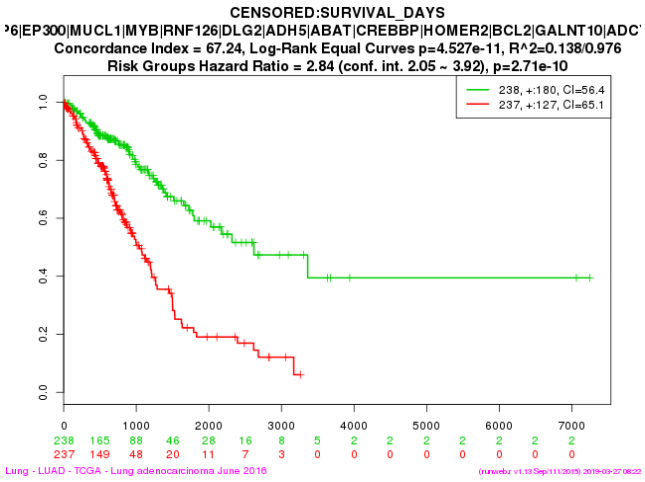

(H)

Module-8

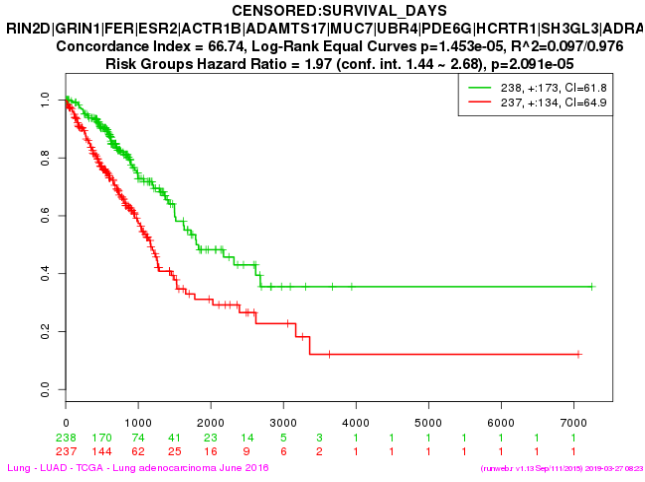

(I)

Module-9

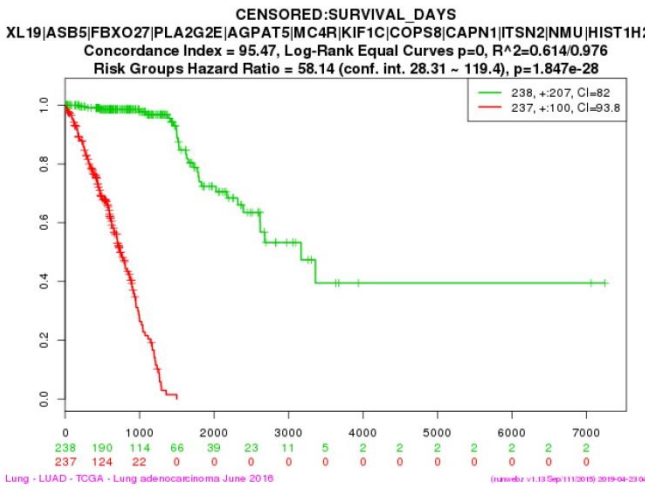

(J)

Module-10

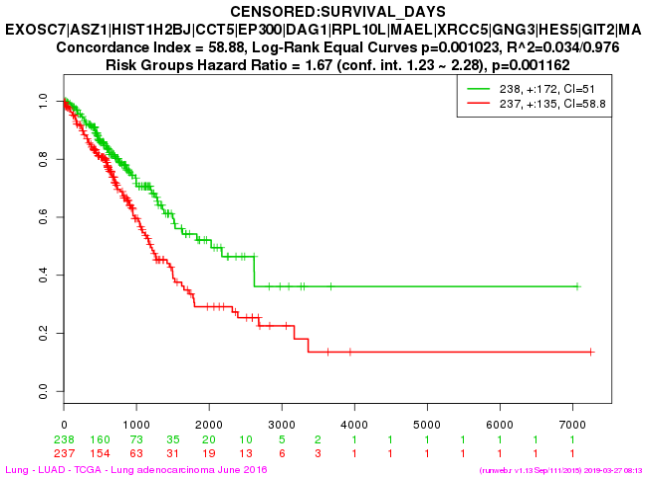

Supplement: Data_Sheet_1.ZIP [file Data_Sheet_1.ZIP]

Gene-pair & Snp association matrix

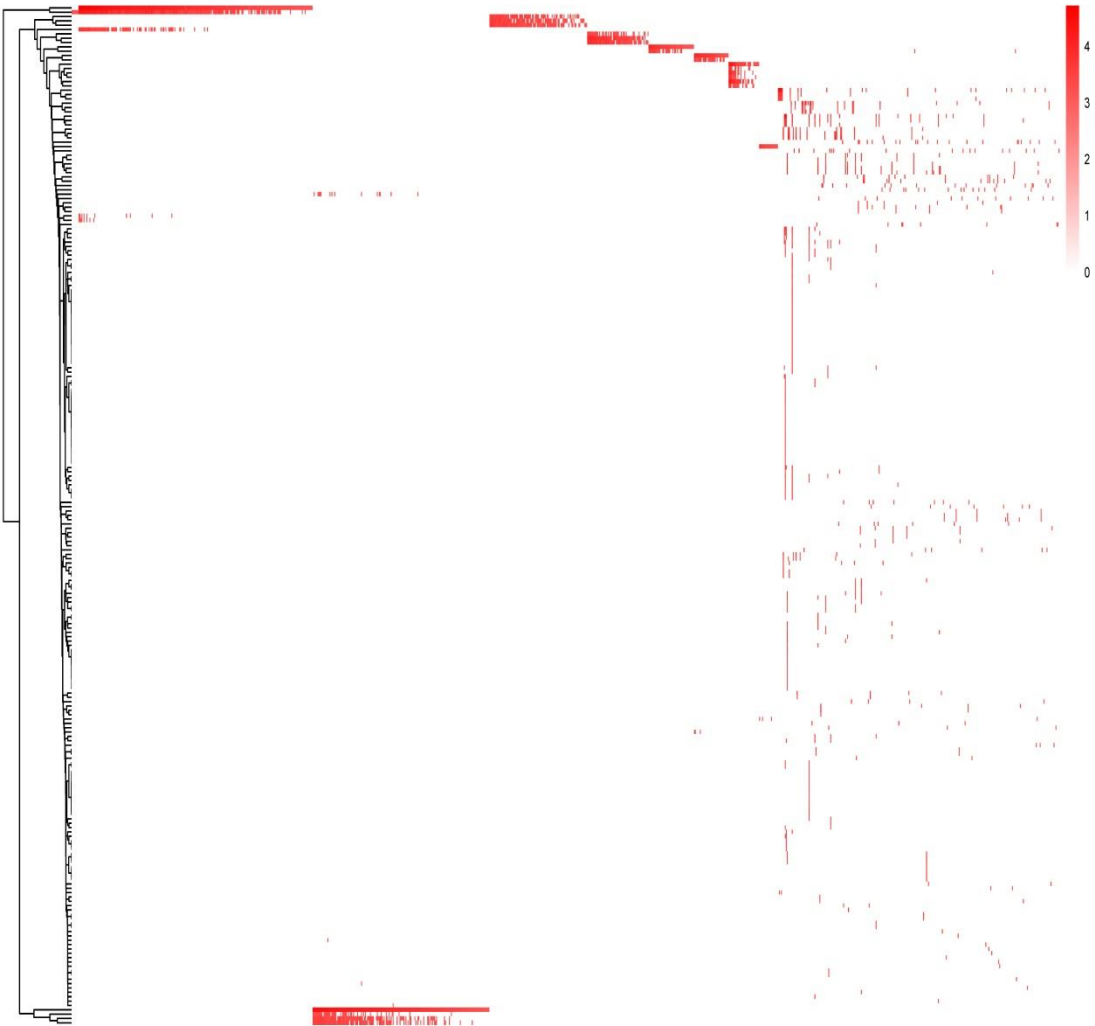

(A)

Gene-pair association matrix

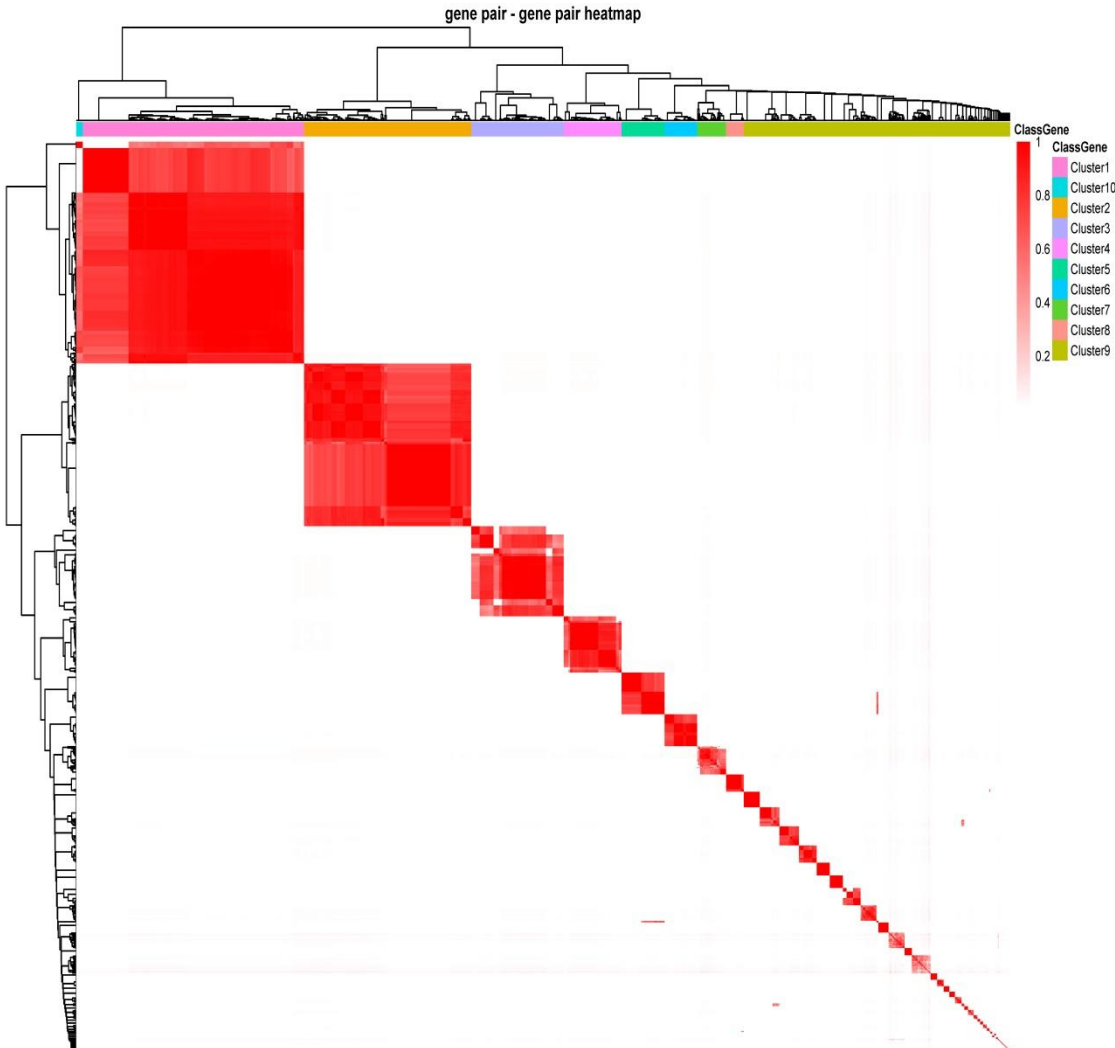

(B)

Supplement: Data_Sheet_1.ZIP [file Data_Sheet_1.ZIP]

# eQTL Manhattan plot on GSE28571

(A)

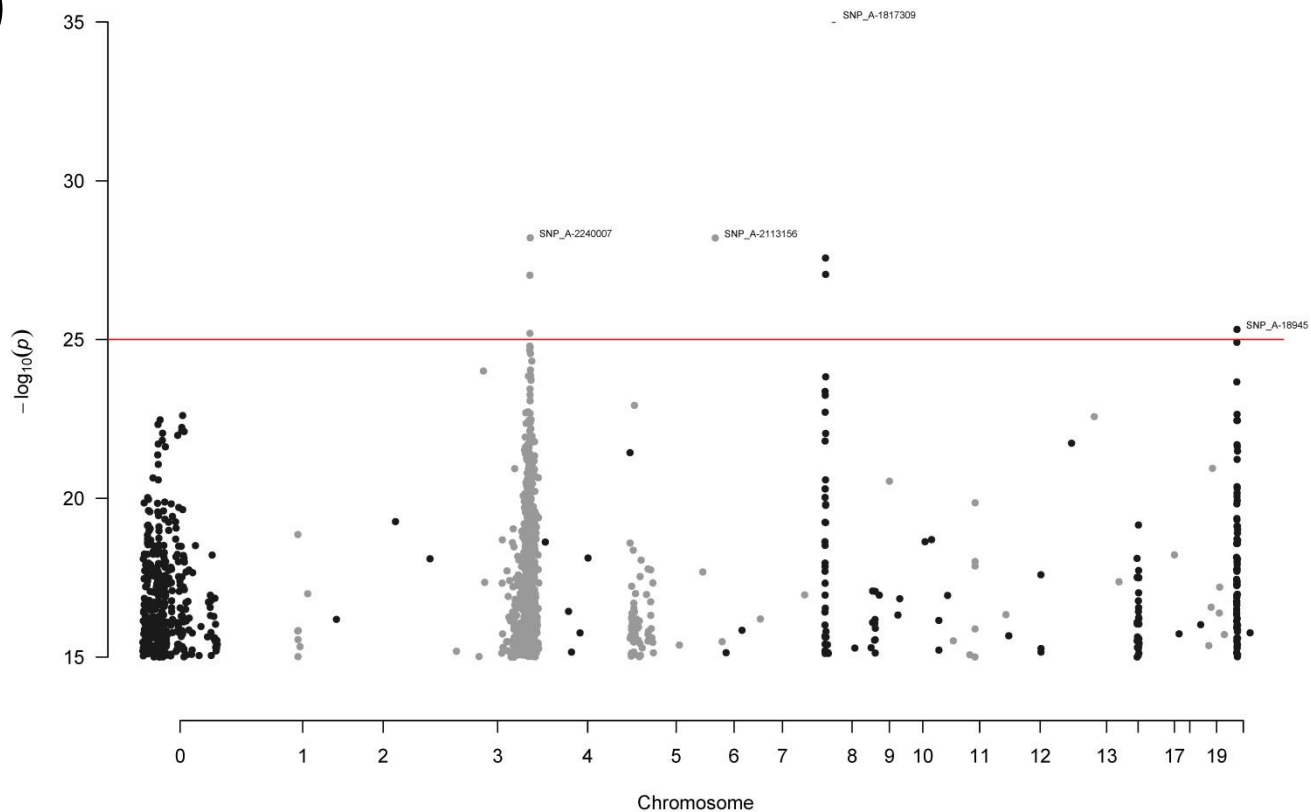

# nQTL Manhattan plot on GSE28571

(B)

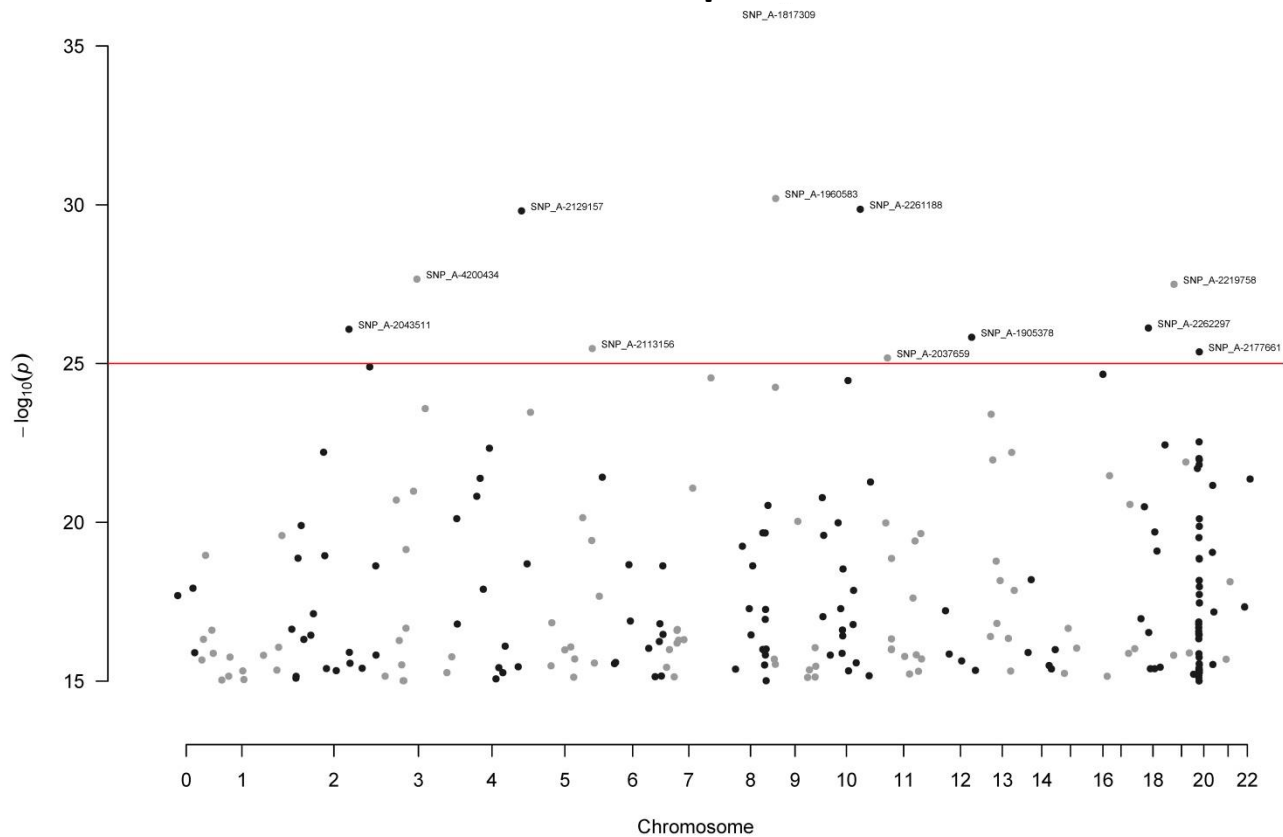

Supplement: Data_Sheet_1.ZIP [file Data_Sheet_1.ZIP]

nqtl-eqtl snps venn plot

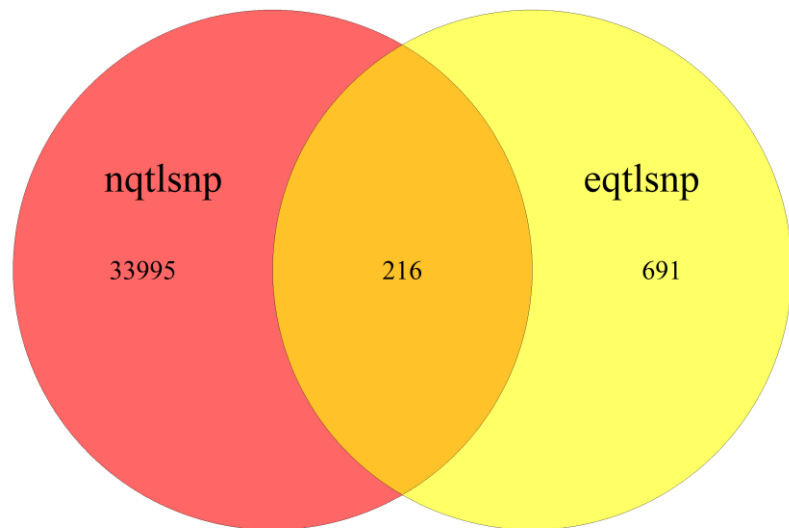

**(A)**

nqtl-eqtl genes venn plot

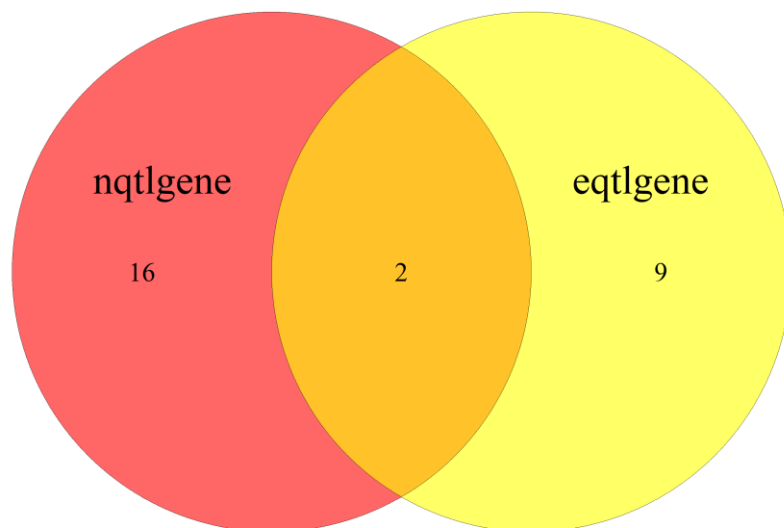

**(B)**

Supplement: Data_Sheet_1.ZIP [file Data_Sheet_1.ZIP]
